# Supplementary material for: Jingmen Tick Virus in Ticks from Kenya
Source: MDPI journal article supplement (doi:10.3390/v14051041), 2022-05-13
Supplement: s1 [file s1]

**Table S1.** Primers, probes and PCR conditions used in the study.

| Primer or Probe Name | Sequence (5'to 3')         | Amplicon Size (nt) | Annealing Temperature °C | Note                                 |
|----------------------|----------------------------|--------------------|--------------------------|--------------------------------------|
| Tick COI F           | TAAACTTCTGGATGTCCAAAAAATCA | 658                | 55                       | Tick identification [1]              |
| Tick COI R           | ATTCAACCAATCATAAAGATATTGG  |                    |                          |                                      |
| F-RMI16S             | AATTGCTGTAGTATTTTGAC       | 450                | 55                       | Tick identification [2]              |
| R-RMI16S             | TCTGAACTCAGATCAAGTAG       |                    |                          |                                      |
| TITS2F1              | CGAGACTTGGTGTGAATTGCA      | 750-2000           | 65                       | Tick identification [3]              |
| TITS2R1              | TCCCATACACCACATTTCCCG      |                    |                          |                                      |
| JMTV-b_F1            | AGYGUGGCRGGACAGGG          | 616                | 64 - 56                  | JMTV screening                       |
| JMTV-b_R1            | GCCAGUACCURUGGGAGC         |                    |                          |                                      |
| JMTV_115_F           | GAGGCGTAAACCCTAGCCTC       | 117                | 60                       | Quantitative TaqMan<br>Real-time PCR |
| JMTV_231_R           | GACTGGCCCCGACTGATAAG       |                    |                          |                                      |
| JMTV_118_Probe       | CGCCTGTTTCCCCTCTCATC       |                    |                          |                                      |

## References

1. Lv, J.; Wu, S.; Zhang, Y.; Chen, Y.; Feng, C.; Yuan, X.; Jia, G.; Deng, J.; Wang, C.; Wang, Q.; Mei, L.; Lin, X. Assessment of Four DNA Fragments (COI, 16S RDNA, ITS2, 12S rDNA) for Species Identification of the Ixodida (Acari: Ixodida). *Parasites and Vectors* **2014**, *7*, 1–11. <https://doi.org/10.1186/1756-3305-7-93/TABLES/4>.
2. Brahma, R. K.; Dixit, V.; Sangwan, A. K.; Doley, R. Identification and Characterization of Rhipicephalus (Boophilus) Microplus and Haemaphysalis Bispinosa Ticks (Acari: Ixodidae) of Northeast India by ITS2 and 16S RDNA Sequences and Morphological Analysis. *Exp. Appl. Acarol.* **2014**, *62*, 253–265. <https://doi.org/10.1007/S10493-013-9732-4>.
3. Chitimia, L.; Lin, R. Q.; Cosoroaba, I.; Braila, P.; Song, H. Q.; Zhu, X. Q. Molecular Characterization of Hard and Soft Ticks from Romania by Sequences of the Internal Transcribed Spacers of Ribosomal DNA. *Parasitol. Res.* **2009**, *105*, 907–911. <https://doi.org/10.1007/S00436-009-1474-1>.
