# Supplementary material for: Jingmen Tick Virus in Ticks from Kenya
Source: MDPI journal article supplement (doi:10.3390/v14051041), 2022-05-13
Supplement: s1 [file s1]

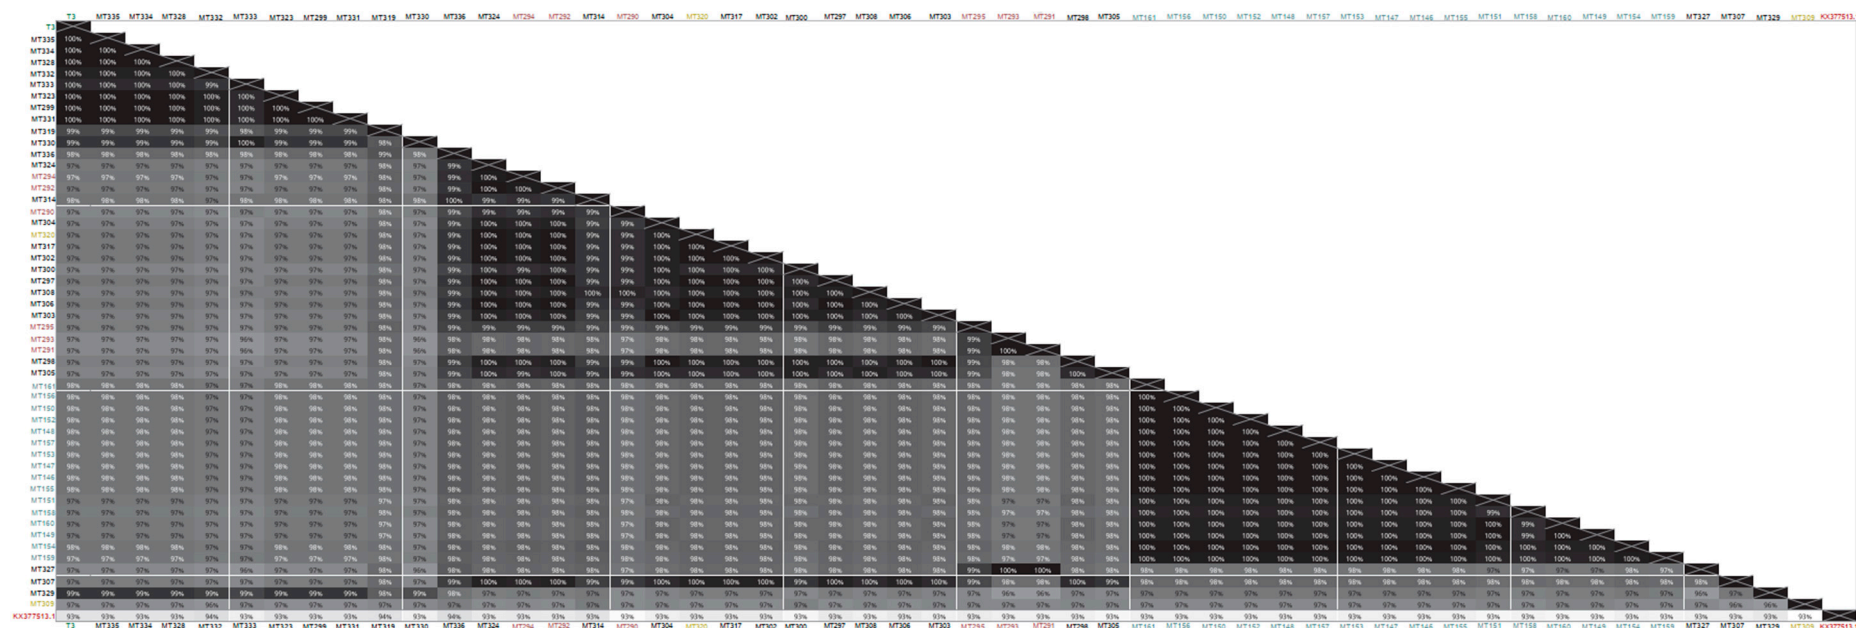

**Figure S2.** JMTV distance matrix. Distance matrix of the NS5 616-bp region of detected JMTV in different tick species, tortoise, and non-human primate (KX377513.1). Black: *Amblyomma* sp.; brown: *Am. sparsum*; orange: *Am. nuttalli*; teal: *Rh. appendiculatus*; green: tortoise. Light grey to dark shades highlights nt distances.
