# Supplementary material for: Jingmen Tick Virus in Ticks from Kenya
Source: MDPI journal article supplement (doi:10.3390/v14051041), 2022-05-13
Supplement: s1 [file s1]

**Table S2.** Sequences generated in this study submitted to GenBank.

>MT326\_ON220154

TCCTAATCCAACATCGAGGTCGCAAACATATTTTGTCTATAAGAACTATCAAAAATTATTACGCTGTTA  
TCCCTAGAGTATTTTCCATATGACCGTTAATAATGGTTCGTATTTTTTTTTTAAATAAAAGTTTAATAT  
ATTTATTAATCGCCCCAATTAAAAATAAATAATTATAAATTTAAATTATTTTTTAAAAAATTCTTAGG  
GTCTTCTTGTCTTAATTTTTTATTGTTGTTTCTTCACAAACAAAATAAACTTTAAATTTTAATTTTAA  
AAAAGTAGTTTTCTGTGGGTCCATTCTCTTAGCACTC

>MT324\_ON220155

TCCTAATCCAACATCGAGGTCGCAAACATATTTTGTCTATAAGAACTATCAAAAATTATTACGCTGTTA  
TCCCTAGAGTATTTTCCATATGACCATTAAATAATGGTTCATATTTTTTTTTTAAATAAAAGTTTAATAT  
ATTTATTAATCGCCCCAATTAAAAATAAATAATTATAAATTTAAATTATCTTTTAAAAAATTCTTAGG  
GTCTTCTTGTCTTAATTTTTTATTGTTGTTTCTTCACAAACAAAATAAACTTTAAATTTTAATTTTAA  
AAAAGTAGTTTTCTGTGGGTCCATTCTCTTAGCACTC

>MT298\_ON220156

TCCTAATCCAACATCGAGGTCGCAAACATATTTTGTCTATAAGAACTATCAAAAATTATTACGCTGTTA  
TCCCTAGAGTATTTTCCATATGACCATTAAATAATGGTTCGTATTTTTTTTTTAAATAAAAGTTTAATAT  
ATTTATTAATCGCCCCAATTAAAAATAAATAATTATAAATTTAAATTATCTTTTAAAAAATTCTTAGG  
GTCTTCTTGTCTTAATTTTTTATTGTTGTTTCTTCACAAACAAAATAAACTTTAAATTTTAATTTTAA  
AAAAGTAGTTTTCTGTGGGTCCATTCTCTTAGCACTC

>MT299\_ON220157

TCCTAATCCAACATCGAGGTCGCAAACATATTTTGTCTATAAGAACTATCAAAAATTATTACGCTGTTA  
TCCCTAGAGTATTTTCCATATGACCATTAAATAATGGTTCGTATTTTTTTTTTAAATAAAAGTTTAATAT  
ATTTATTAATCGCCCCAATTAAAAATAAATAATTATAAATTTAAATTATCTTTTAAAAAATTCTTAGG  
GTCTTCTTGTCTTAATTTTTTATTGTTGTTTCTTCACAAACAAAATAAACTTTAAATTTTAATTTTAA  
AAAAGTAGTTTTCTGTGGGTCCATTCTCTTAGCACTC

>MT331\_ON220158

TCCTAATCCAACATCGAGGTCGCAAACATATTTTGTCTATAAGAACTATCAAAAATTATTACGCTGTTA  
TCCCTAGAGTATTTTCCATATGACCATTAAATAATGGTTCGTATTTTTTTTTTAAATAAAAGTTTAATAT  
ATTTATTAATCGCCCCAATTAAAAATAAATAATTATAAATTTAAATTATCTTTTAAAAAATTCTTAGG  
GTCTTCTTGTCTTAATTTTTTATTGTTGTTTCTTCACAAACAAAATAAACTTTAAATTTTAATTTTAA  
AAAAGTAGTTTTCTGTGGGTCCATTCTCTTAGCACTC

>MT297\_ON220159

TCCTAATCCAACATCGAGGTCGCAAACATATTTTGTCTATAAGAACTATCAAAAATTATTACGCTGTTA  
TCCCTAGAGTATTTTCCATATGACCATTAAATAATGGTTCGTATTTTTTTTTTAAATAAAAGTTTAATAT  
ATTTATTAATCGCCCCAATTAAAAATAAATAATTATAAATTTAAATTATCTTTTAAAAAATTCTTAGG  
GTCTTCTTGTCTTAATTTTTTATTGTTGTTTCTTCACAAACAAAATAAACTTTAAATTTTAATTTTAA  
AAAAGTAGTTTTCTGTGGGTCCATTCTCTTAGCACTC

>MT326\_ON212401

CGGCAAAACGGACGGCTCAAAGGAACGCTGAAGATCCCTCGAAAGACTTTGCGAAAGAGGAGGAGAGT  
GGGTTGAACCCCTCGGCCGCGCGAAAGCGGCAGAGTCGGGTCGCCCTGCGCTGACGTAACGTGGTCCA  
GTGGCTGTCGAGCCATATAACGTCCAGTCTCTGAATGGCGACCGCCGCGAGGAAGGGATTACCTGCAGG

GAAAGAGCGGTCCCAAGGAGAGAAGAGGCACGGGGCGGGTGGCAAAGCGCTGCCTGCTGGACCGCGGA  
GAAGTATCCAAACAGCTGCGAACCGCAGAGACGGGAGCGCCCTGTCCAGGCACGCCTGCGCGAGAAGA  
AGGGAGATCTCGCGCGGGAAGGTGACGGGCGTGAACGCGGTGAGCGCGGCAGTTCGGAGGCGCAGTGG  
CGCGTCGCGACGCGGCAAAGAAGGGATCCTCCGGACCAGAGGAAAAATGGTCCGCCTCCCTGAATGGG  
CGCGAAGTCGAGTACAGGTTGAACGGATGCAGTTTTCGAGCGCAGTCCGCCGTCCGGTCTAAGTGCTTCG  
CAGTCTCTGCCCCGATAAAAACTGGGCCACTCCAGTTGGGGCGGGGGCGACGCAAACTGTTGACGAT  
GCCCCCTCCGCCAGGTCGAGGCCGTCTCTCGAGGGAAAGAGGGACGGCAGGGAATTATTCGGCCGCGG  
CGGTGCGGGGCCCTACTCAACGCTTGTTATCGCGCAAACGCAGGCGCGCTGTCCTGAGCGCCGGCCAG  
CGGTGCCTTCCTGTCTCGCTCCAGTCGCGGAGGGTGTGTCGGCTGAGAGCGGGGAATGGGCGGAAGG  
TGTGGGCCGAGATGGGGAAGGACACACGCGCGCTCGACCGCGCTGGAAACGAGCGAGAGAATGCATA  
TCTGTGACCTCAGATCAGGCGAGACAACCCGCTGAATTTAAGCATATCACTAAGCGGAGGAAAAGAA  
ACCAACA

>MT298\_ON212402

CGGCAAAACGGACGGCTCAAAGGAACGCTGAAGATCCCTCGAAAGACTTTGCGAAAGAGGAGGAGAGT  
GGGTTGAACCTTCGGCCGCGCGAAAGCGGCAGAGTCGGGTGCGCCTGCGCTGACGTAACGTGGTCCA  
GTGGCTGTGAGCCATATAACGTCCAGTCTCTGAATGGCGACCGCCGCAGGAAGGGATTACCTGCAGG  
GAAAGAGCGGTCCCAAGGAGAGAAGAGGCACGGGGCGGGTGGCAAAGCGCTGCCTGCTGGACCGCGGA  
GAAGTATCCAAACAGCTGCGAACCGCAGAGACGGGAGCGCCCTGTCCAGGCACGCCTGCGCGAGAAGA  
AGGGAGATCTCGCGCGGGAAGGTGACGGGCGTGAACGCGGTGAGCGCGGCAGTTCGGAGGCGCAGTGG  
CGCGTCGCGACGCGGCAAAGAAGGGATCCTCCGGACCAGAGGAAAAATGGTCCGCCTCCCTGAATGGG  
CGCGAAGTCGAGTACAGGTTGAACGGATGCAGTTTTCGAGCGCAGTCCGCCGTCCGGTCTAAGTGCTTCG  
CAGTCTCTGCCCCGATAAAAACTGGGCCACTCCAGTTGGGGCGGGGGCGACGCAAACTGTTGACGAT  
GCCCCCTCCGCCAGGTCGAGGCCGTCTCTCGAGGGAAAGAGGGACGGCAGGGAATTATTCGGCCGCGG  
CGGTGCGGGGCCCTACTCAACGCTTGTTATCGCGCAAACGCAGGCGCGCTGTCCTGAGCGCCGGCCAG  
CGGTGCCTTCCTGTCTCGCTCCAGTCGCGGAGGGTGTGTCGGCTGAGAGCGGGGAATGGGCGGAAGG  
TGTGGGCCGAGATGGGGAAGGACACACGCGCGCTCGACCGCGCTGGAAACGAGCGAGAGAATGCATA  
TCTGTGACCTCAGATCAGGCGAGACAACCCGCTGAATTTAAGCATATCACTAAGCGGAGGAAAAGAA  
ACCAACA

>MT297\_ON212403

GGCAAAACGGACGGCTCAAAGGAACGCTGAAGATCCCTCGAAAGACTTTGCGAAAGAGGAGGAGAGTG  
GGTTGAACCTTCGGCCGCGCGAAAGCGGCAGAGTCGGGTGCGCCTGCGCTGACGTAACGTGGTCCAG  
TGGCTGTGAGCCATATAACGTCCAGTCTCTGAATGGCGACCGCCGCAGGAAGGGATTACCTGCAGGG  
AAAGAGCGGTCCCAAGGAGAGAAGAGGCACGGGGCGGGTGGCAAAGCGCTGCCTGCTGGACCGCGGAG  
AAGTATCCAAACAGCTGCGAACCGCAGAGACGGGAGCGCCCTGTCCAGGCACGCCTGCGCGAGAAGAA  
GGGAGATCTCGCGCGGGAAGGTGACGGGCGTGAACGCGGTGAGCGCGGCAGTTCGGAGGCGCAGTGGC  
GCGTCGCGACGCGGCAAAGAAGGGATCCTCCGGACCAGAGGAAAAATGGTCCGCCTCCCTGAATGGGC  
GCGAAGTCGAGTACAGGTTGAACGGATGCAGTTTTCGAGCGCAGTCCGCCGTCCGGTCTAAGTGCTTCGC  
AGTCTCTGCCCCGATAAAAACTGGGCCACTCCAGTTGGGGCGGGGGCGACGCAAACTGTTGACGATG  
CCCCCTCCGCCAGGTCGAGGCCGTCTCTCGAGGGAAAGAGGGACGGCAGGGAATTATTCGGCCGCGGC  
GGTCGGGGGCCCTACTCAACGCTTGTTACCGCGCAAACGCAGGCGCGCTGTCCTGAGCGCCGGCCAGC  
GGTGCCTTCCTGTCTCGCTCCAGTCGCGGAGGGTGTGTCGGCTGAGAGCGGGGAATGGGCGGAAGGT  
GTGGGCCGAGATGGGGAAGGACACACGCGCGCTCGACCGCGCTGGAAACGAGCGAGAGAATGCATAT  
CTGTGACCTCAGATCAGGCGAGACAACCCGCTGAATTTAAGCATATCACTAAGCGGAGGAAAAGAAA  
CCAACA

>MT299\_ON212404

CGGCAAAACGGACGGCTCAAAGGAACGCTGAAGATCCCTCGAAAGACTTTGCGAAAGAGGAGGAGAGT  
GGGTTGAACCCCTTCGGCCGCGCGAAAGCGGCAGAGTCGGGTCGCCCTGCGCTGACGTAACGTGGTCCA  
GTGGCTGTTCGAGCCATATAACGTCCAGTCTCTGAATGGCGACCGCCGCAGGAAGGGATTACCTGCAGG  
GAAAGAGCGGTCCCAAGGAGAGAAGAGGCACGGGGCGGGTGGCAAAGCGCTGCCTGCTGGACCGCGGA  
GAAGTATCCAAACAGCTGCGAACC GCAGAGACGGGAGCGCCCTGTCCAGGCACGCCTGCGCGAGAAGA  
AGGGAGATCTCGCGCGGAAGGTGACGGGCGTGAACGCGGTGAGCGCGGCAGTTTCGGAGGCGCAGTGG  
CGCGTCGCGACGCGGCAAAGAAGGGATCCTCCGGACCAGAGGAAAAATGGTCCGCCTCCCTGAATGGG  
CGCGAAGTCGAGTACAGGTTGAACGGATGCAGTTTCGAGCGCAGTCCGCCGTGCGTCTAAGTGCTTCG  
CAGTCTCTGCCCCGATAAAAACTGGGCCACTCCAGTTGGGGCGGGGGCGACGCAAACTGTTGACGAT  
GCCCCCTCCGCCAGGTTCGAGGCCGTCTCTCGAGGGAAAGAGGGACGGCAGGGAATTATTTCGGCCGCGG  
CGGTTCGGGGGCCCTACTCAACGCTTGTTAYCGCGCAAACGCAGGCGCGCTGTCCTGAGCGCCGGCCAG  
CGGTGCCTTCCTGTCTCGCTCCAGTCGCCGAGGGTGTTCGCCGCTGAGAGCGGGGAATGGGCGGAAGG  
TGTGGGCCGGAGATGGGGAAGGACACACGCGCGCTCGACCGCGCTGGAAACGAGCGAGAGAATGCATA  
TCTGTTCGACCTCAGATCAGGCGAGACAACCCGCTGAATTTAAGCATATCACTAAGCGGAGGAAAAGAA  
ACCAACA

>MT324\_ON212405

GGCAAAACGGACGGCTCAAAGGAACGCTGAAGATCCCTCGAAAGACTTTGCGAAAGAGGAGGAGAGTG  
GGTTGAACCCCTTCGGCCGCGCGAAAGCGGCAGAGTCGGGTCGCCCTGCGCTGACGTAACGTGGTCCAG  
TGGCTGTTCGAGCCATATAACGTCCAGTCTCTGAATGGCGACCGCCGCAGGAAGGGATTACCTGCAGGG  
AAAGAGCGGTCCCAAGGAGAGAAGAGGCACGGGGCGGGTGGCAAAGCGCTGCCTGCTGGACCGCGGAG  
AAGTATCCAAACAGCTGCGAACC GCAGAGACGGGAGCGCCCTGTCCAGGCACGCCTGCGCGAGAAGAA  
GGGAGATCTCGCGCGGGAAGGTGACGGGCGTGAACGCGGTGAGCGCGGCAGTTTCGGAGGCGCAGTGGC  
GCGTCGCGACGCGGCAAAGAAGGGATCCTCCGGACCAGAGGAAAAATGGTCCGCCTCCCTGAATGGGC  
GCGAAGTCGAGTACAGGTTGAACGGATGCAGTTTCGAGCGCAGTCCGCCGTGCGTCTAAGTGCTTCGC  
AGTCTCTGCCCCGATAAAAACTGGGCCACTCCAGTTGGGGCGGGGGCGACGCAAACTGTTGACGATG  
CCCCCTCCGCCAGGTTCGAGGCCGTCTCTCGAGGGAAAGAGGGACGGCAGGGAATTATTTCGGCCGCGGC  
GGTCGGGGGCCCTACTCAACGCTTGTTACCGCGCAAACGCAGGCGCGCTGTCCTGAGCGCCGGCCAGC  
GGTGCTTCCTGTCTCGCTCCAGTCGCCGAGGGTGTTCGCCGCTGAGAGCGGGGAATGGGCGGAAGGT  
GTGGGCCGGAGATGGGGAAGGACACACGCGCGCTCGACCGCGCTGGAAACGAGCGAGAGAATGCATAT  
CTGTTCGACCTCAGATCAGGCGAGACAACCCGCTGAATTTAAGCATATCACTAAGCGGAGGAAAAGAAA  
CCAACA

>T3\_ON158817

GAGATCGAGTAAAGAAGTCAATGGACGCTACCGGCGCCGCTATAGCGGAAGACGTGGCGGGCTGGGAC  
ACAAAGATCTCCAAAGGACTGCTCACCCCTGGAGTCCCACATGTTACCAAGCTGGCGGAGGATGAAGA  
AATGGCGCGGGAGATCCACCACCTCTACCGACTCTACGCAGATCCACACATGGTGGTCCAGAGGGAGA  
TTGAAGGTGAAGTTCATGACGTACTCCTTAGGGGGAGGGGGCAGGTCTCTTCCGGGAGGCAGCCCACC  
TACGCGGCCAACACCATCACCAACTTCATAACGACAACATATGGAATGGCCGTGACCCCTGGTATACC  
TGAGGCCGACTGGCCCCGACTGGTAAGGGACCTCACAGATGAGAGGGGAAACAGGCGTCTCCTCGTCT  
CGGGGGACGACAAGGTTCTTTTCTTAAGAGGAGATGAGGCTAGGGCTTATGCCTCATCGGCCTACCGG  
ATAAGTAACGAC

>MT335\_ON158818

GAGATCGAGTAAAGAAGTCAATGGACGCTACCGGCGCCGCTATAGCGGAAGACGTGGCGGGCTGGGAC  
ACAAAGATCTCCAAAGGACTGCTCACCCCTGGAGTCCCACATGTTACCAAGCTGGCGGAGGATGAAGA  
AATGGCGCGGGAGATCCACCACCTCTACCGACTCTACGCAGATCCACACATGGTGGTCCAGAGGGAGA  
TTGAAGGTGAAGTTCATGACGTACTCCTTAGGGGGAGGGGGCAGGTCTCTTCCGGGAGGCAGCCCACC

TACGCGGCCAACACCATCACCAACTTCATAACGACAACATATGGAATGGCCGTGACCCCTTGGTATACC  
TGAGGCCGACTGGCCCCGACTGGTAAGGGACCTCACAGATGAGAGGGGAAACAGGCGTCTCCTCGTCT  
CGGGGGACGACAAGGTTCTTTTCTTAAGAGGAGATGAGGCTAGGGCTTATGCCTCATCGGCCTACCGG  
ATAAGTAACGAC

>MT334\_ON158819

GAGATCGAGTAAAGAAGTCAATGGACGCTACCGGCGCCGCTATAGCGGAAGACGTGGCGGGCTGGGAC  
ACAAAGATCTCCAAAGGACTGCTCACCCCTGGAGTCCCACATGTTTACCAAGCTGGCGGAGGATGAAGA  
AATGGCGCGGGAGATCCACCACCTCTACCGACTCTACGCAGATCCACACATGGTGGTCCAGAGGGAGA  
TTGAAGGTGAAGTTCATGACGTACTCCTTAGGGGGAGGGGGCAGGTCTCTTCCGGGAGGCAGCCCACC  
TACGCGGCCAACACCATCACCAACTTCATAACGACAACATATGGAATGGCCGTGACCCCTTGGTATACC  
TGAGGCCGACTGGCCCCGACTGGTAAGGGACCTCACAGATGAGAGGGGAAACAGGCGTCTCCTCGTCT  
CGGGGGACGACAAGGTTCTTTTCTTAAGAGGAGATGAGGCTAGGGCTTATGCCTCATCGGCCTACCGG  
ATAAGTAACGAC

>MT328\_ON158820

GAGATCGAGTAAAGAAGTCAATGGACGCTACCGGCGCCGCTATAGCGGAAGACGTGGCGGGCTGGGAC  
ACAAAGATCTCCAAAGGACTGCTCACCCCTGGAGTCCCACATGTTTACCAAGCTGGCGGAGGATGAAGA  
AATGGCGCGGGAGATCCACCACCTCTACCGACTCTACGCAGATCCACACATGGTGGTCCAGAGGGAGA  
TTGAAGGTGAAGTTCATGACGTACTCCTTAGGGGGAGGGGGCAGGTCTCTTCCGGGAGGCAGCCCACC  
TACGCGGCCAACACCATCACCAACTTCATAACGACAACATATGGAATGGCCGTGACCCCTTGGTATACC  
TGAGGCCGACTGGCCCCGACTGGTAAGGGACCTCACAGATGAGAGGGGAAACAGGCGTCTCCTCGTCT  
CGGGGGACGACAAGGTTCTTTTCTTAAGAGGAGATGAGGCTAGGGCTTATGCCTCATCGGCCTACCGG  
ATAAGTAACGAC

>MT323\_ON158821

GAGATCGAGTAAAGAAGTCAATGGACGCTACCGGCGCCGCTATAGCGGAAGACGTGGCGGGCTGGGAC  
ACAAAGATCTCCAAAGGACTGCTCACCCCTGGAGTCCCACATGTTTACCAAGCTGGCGGAGGATGAAGA  
AATGGCGCGGGAGATCCACCACCTCTACCGACTCTACGCAGATCCACACATGGTGGTCCAGAGGGAGA  
TTGAAGGTGAAGTTCATGACGTACTCCTTAGGGGGAGGGGGCAGGTCTCTTCCGGGAGGCAGCCCACC  
TACGCGGCCAACACCATCACCAACTTCATAACGACAACATATGGAATGGCCGTGACCCCTTGGTATACC  
TGAGGCCGACTGGCCCCGACTGGTAAGGGACCTCACAGATGAGAGGGGAAACAGGCGTCTCCTCGTCT  
CGGGGGACGACAAGGTTCTTTTCTTAAGAGGAGATGAGGCTAGGGCTTATGCCTCATCGGCCTACCGG  
ATAAGTAACGAC

>MT299\_ON158822

GAGATCGAGTAAAGAAGTCAATGGACGCTACCGGCGCCGCTATAGCGGAAGACGTGGCGGGCTGGGAC  
ACAAAGATCTCCAAAGGACTGCTCACCCCTGGAGTCCCACATGTTTACCAAGCTGGCGGAGGATGAAGA  
AATGGCGCGGGAGATCCACCACCTCTACCGACTCTACGCAGATCCACACATGGTGGTCCAGAGGGAGA  
TTGAAGGTGAAGTTCATGACGTACTCCTTAGGGGGAGGGGGCAGGTCTCTTCCGGGAGGCAGCCCACC  
TACGCGGCCAACACCATCACCAACTTCATAACGACAACATATGGAATGGCCGTGACCCCTTGGTATACC  
TGAGGCCGACTGGCCCCGACTGGTAAGGGACCTCACAGATGAGAGGGGAAACAGGCGTCTCCTCGTCT  
CGGGGGACGACAAGGTTCTTTTCTTAAGAGGAGATGAGGCTAGGGCTTATGCCTCATCGGCCTACCGG  
ATAAGTAACGAC

>MT331\_ON158823

GAGATCGAGTAAAGAAGTCAATGGACGCTACCGGCGCCGCTATAGCGGAAGACGTGGCGGGCTGGGAC  
ACAAAGATCTCCAAAGGACTGCTCACCCCTGGAGTCCCACATGTTTACCAAGCTGGCGGAGGATGAAGA

AATGGCGCGGGAGATCCACCACCTCTACCGACTCTACGCAGATCCACACATGGTGGTCCAGAGGGAGA  
TTGAAGGTGAAGTTTCATGACGTACTCCTTAGGGGGAGGGGGCAGGTCTCTTCCGGGAGGCAGCCCACC  
TACGCGGCCAACACCATCACCAACTTCATAACGACAACATATGGAATGGCCGTGACCCCTTGGTATAACC  
TGAGGCCGACTGGCCCCGACTGGTAAGGGACCTCACAGATGAGAGGGGAAACAGGCGTCTCCTCGTCT  
CGGGGGACGACAAGGTTCTTTTCTTAAGAGGAGATGAGGCTAGGGCTTATGCCTCATCGGCCTACCGG  
ATAAGTAACGAC

>MT332\_ON158824

GAGATCGAGTAAAGAAGTCAATGGACGCTACCGGCGCCGCTATAGCGGAAGACGTGGCGGGCTGGGAC  
ACAAAGATCTCCAAAGGACTGCTCACCCCTGGAGTCCCACATGTTTACCAAGCTGGCGGAGGATGAAGA  
AATGGCGCGGGAGATCCACCACCTCTACCGACTCTACGCAGATCCACACATGGTGGTCCAGAGGGAGA  
TTGAAGGTGAAGTTTCATGACGTACTCCTTAGGGGGAGGGGGCAGGTCTCTTCCGGGAGGCAGCCCACC  
TACGCGGCCAACACCATCACCAACTTCATAACGACAACATATGGAATGGCCGTGACCCCTTGGTATAACC  
TGAGGCCGACTGGCCCCGACTGGTAAGGGACCTCACAGATGAGAGGGGAAACAGGCGTCTCCTCGTCT  
CGGGGGACGACAAGGTTCTTTTCTTAAGAGGAGATGAGGCTAGGGCTTATGCCTCATCGGCCTACCGG  
ATAAGCAACGAC

>MT333\_ON158825

GAGATCGAGTAAAGAAGTCAATGGACGCTACCGGCGCCGCTATAGCGGAAGACGTGGCGGGCTGGGAC  
ACAAAGATCTCCAAAGGACTGCTCACCCCGGAGTCCCACATGTTTACCAAGCCGGCGGAGGATGAAGA  
AATGGCGCGGGAGATCCACCACCTCTACCGACTCTACGCAGATCCACACATGGTGGTCCAGAGGGAGA  
TTGAAGGTGAAGTTTCATGACGTACTCCTTAGGGGGAGGGGGCAGGTCTCTTCCGGGAGGCAGCCCACC  
TACGCGGCCAACACCATCACCAACTTCATAACGACAACATATGGAATGGCCGTGACCCCTTGGTATAACC  
TGAGGCCGACTGGCCCCGACTGGTAAGGGACCTCACAGATGAGAGGGGAAACAGGCGTCTCCTCGTCT  
CGGGGGACGACAAGGTTCTTTTCTTAAGAGGAGATGAGGCTAGGGCTTATGCCTCATCGGCCTACCGG  
ATAAGTAACGAC

>MT330\_ON158826

GAGATCGAGTAAAGAAGTCAATGGACGCAACCGGCGCCGCTATAGCGGAAGACGTGGCGGGCTGGGAC  
ACAAAGATCTCCAAAGGACTGCTCACCCCGGAGTCCCACATGTTTACCAAGCCGGCGGAGGATGAAGA  
AATGGCGCGGGAGATCCACCACCTCTACCGACTCTACGCAGATCCACACATGGTGGTCCAGAGGGAGA  
TTGAAGGTGAAGTTTCATGACGTACTCCTTAGGGGGAGGGGGCAGGTCTCTTCCGGGAGGCAGCCCACC  
TACGCGGCCAACACCATCACCAACTTCATAACGACAACATATGGAATGGCCGTGACCCCTTGGTATAACC  
TGAGGCCGACTGGCCCCGACTGGTAAGGGACCTCACAGATGAGAGGGGAAACAGGCGTCTCCTCGTCT  
CGGGGGACGACAAGGTTCTTTTCTTAAGAGGAGATGAGGCTAGGGCTTATGCCTCATCGGCCTACCGG  
ATAAGTAACGAC

>MT319\_ON158827

GAGAYCGAGTAAAGAAGTCAATGGACGCCACCGGCGCCGCTATAGCGGAAGACGTGGCGGGCTGGGAC  
ACAAAGATCTCCAAAGGACTGCTCACCCCTGGAGTCCCATATGTTTACCAAGCTGGCGGAGGATGAAGA  
AATGGCGCGGGAGATCCACCACCTCTACCGACTCTACGCAGATCCACACATGGTGGTCCAGAGGGAGA  
TTGAAGGTGAGGTTTCATGACGTACTCCTTAGGGGGAGGGGGCAGGTCTCTTCCGGGAGGCAGCCCACC  
TACGCGGCCAACACCATCACCAACTTCATAACGACAACATATGGAATGGCCGTGACCCCTTGGTATAACC  
TGAGGCCGACTGGCCCCGACTGATAAGGGACCTCACAGATGAGAGGGGAAACAGGCGTCTCCTCGTCT  
CGGGGGACGACAAGGTCCTTTTCTTAAGAGGAGATGAGGCTAGGGCTTATGCCTCATCGGCCTACCGG  
ATAAGTAACGAC

>MT336\_ON158828

GAGATCGAGTAAAGAAGTCAATGGACGCCACCGGCGCCGCTATAGCGGAAGACGTGGCGGGCTGGGAC  
ACCAAGATCTCCAAAGGACTGCTCACCCTGGAGTCCCATATGTTTACCAAGCTGGCGGAGGATGAAGA  
AATGGCGCGGGAGATCCACCACCTCTACCGACTCTACGCAGATCCACACATGGTGGTCCAGAGGGAGA  
TTGAAGGTGAGGTCCATGACGTACTCCTTAGGGGGAGGGGGCAGGTCTCCTCCGGGAGGCAGCCCACC  
TACGCGGCCAACACCATCACCAACTTCATAACGACAACATATGGAATGGCCGTGACCCCTTGGTATAACC  
TGAGGCCGACTGGCCCCGACTGATAAGGGACCTCACAGATGAGAGGGGAAACAGGCGTCTCCTCGTCT  
CGGGGGACGACAAGTCTTTTTCTTAAGGGGAGATGAGGCTAGGGTTTACGCCTCATCGGCCTACCGG  
ATAAGTAACGAC

>MT314\_ON158829

GAGATCGAGTAAAGAAGTCAATGGACGCCACCGGCGCCGCTATAGCGGAAGACGTGGCGGGCTGGGAC  
ACCAAGATCTCCAAAGGACTGCTCACCCTGGAGTCCCATATGTTTACCAAGCTGGCGGAGGATGAAGA  
AATGGCGCGGGAGATCCACCACCTCTACCGACTCTACGCAGATCCACACATGGTGGTCCAGAGGGAGA  
TTGAAGGTGAGGTCCATGACGTACTCCTTAGGGGGAGGGGGCAGGTCTCCTCCGGGAGGCAGCCCACC  
TACGCGGCCAACACCATCACCAACTTCATAACGACAACATATGGAATGGCCGTGACCCCTTGGTATAACC  
TGAGGCCGACTGGCCCCGACTGATAAGGGACCTCACAGATGAGAGGGGAAACAGGCGTCTCCTCGTCT  
CGGGGGACGACAAGTCTTTTTCTTAAGGGGAGATGAGGCTAGGGTTTACGCCTCATCGGCCTACCGG  
ATAAGTAACGAC

>MT324\_ON158830

GAGATCGAGTAAAGAAGTCAATGGACGCCACCGGCGCCGCTATAGCGGAAGACGTGGCGGGCTGGGAC  
ACCAAGATCTCCAAAGGACTGCTCACCCTGGAGTCCCATATGTTTACCAAGCTAGCGGAGGATGAAGA  
AATGGCGCGGGAGATCCACCACCTCTACCGACTCTACGCAGATCCACACATGGTGGTCCAGAGGGAGA  
TTGAAGGTGAGGTCCATGACGTACTCCTTAGGGGGAGGGGGCAGGTCTCCTCCGGGAGGCAGCCCACC  
TACGCGGCCAACACCATCACCAACTTCATAACGACAACATATGGAATGGCCGTGACCCCTTGGTATAACC  
TGAGGCCGACTGGCCCCGACTGATAAGGGACCTCACAGATGAGAGGGGAAACAGGCGTCTCCTCGTCT  
CGGGGGACGACAAGTCTTTTTCTTAAGGGGAGATGAGGCTAGGGTTTACGCCTCGTCGGCCTACCGG  
ATAAGTAACGAC

>MT292\_ON158831

GAGATCGAGTAAAGAAGTCAATGGACGCCACCGGCGCCGCTATAGCGGAAGACGTGGCGGGCTGGGAC  
ACCAAGATCTCCAAAGGACTGCTCACCCTGGAGTCCCATATGTTTACCAAGCTAGCGGAGGATGAAGA  
AATGGCGCGGGAGATCCACCACCTCTACCGACTCTACGCAGATCCACACATGGTGGTCCAGAGGGAGA  
TTGAAGGTGAGGTCCATGACGTACTCCTTAGGGGGAGGGGGCAGGTCTCCTCCGGGAGGCAGCCCACC  
TACGCGGCCAACACCATCACCAACTTCATAACGACAACATATGGAATGGCCGTGACCCCTTGGTATAACC  
TGAGGCCGACTGGCCCCGACTGATAAGGGACCTCACAGATGAGAGGGGAAACAGGCGTCTCCTCGTCT  
CGGGGGACGACAAGTCTTTTTCTTAAGGGGAGATGAGGCTAGGGTTTACGCCTCGTCGGCCTACCGG  
ATAAGTAACGAC

>MT320\_ON158832

GAGATCGAGTAAAGAAGTCAATGGACGCCACCGGCGCCGCTATAGCGGAAGACGTGGCGGGCTGGGAC  
ACCAAGATCTCCAAAGGACTGCTCACCCTGGAGTCCCATATGTTTACCAAGCTAGCGGAGGATGAAGA  
AATGGCGCGGGAGATCCACCACCTCTACCGACTCTACGCAGATCCACACATGGTGGTCCAGAGGGAGA  
TTGAAGGTGAGGTCCATGACGTACTCCTTAGGGGGAGGGGGCAGGTCTCCTCCGGGAGGCAGCCCACC  
TACGCGGCCAACACCATCACCAACTTCATAACGACAACATATGGAATGGCCGTGACCCCTTGGTATAACC  
TGAGGCCGACTGGCCCCGACTGATAAGGGACCTCACAGATGAGAGGGGAAACAGGCGTCTCCTCGTCT  
CGGGGGACGACAAGTCTTTTTCTTAAGGGGAGATGAGGCTAGGGTTTACGCCTCGTCGGCCTACCGG  
ATAAGTAACGAC

>MT317\_ON158833

GAGATCGAGTAAAGAAGTCAATGGACGCCACCGGCGCCGCTATAGCGGAAGACGTGGCGGGCTGGGAC  
ACCAAGATCTCCAAAGGACTGCTCACCTGGAGTCCCATATGTTACCAAGCTAGCGGAGGATGAAGA  
AATGGCGCGGGAGATCCACCACCTCTACCGACTCTACGCAGATCCACACATGGTGGTCCAGAGGGAGA  
TTGAAGGTGAGGTCCATGACGTACTCCTTAGGGGGAGGGGGCAGGTCTCCTCCGGGAGGCAGCCCACC  
TACGCGGCCAACACCATCACCAACTTCATAACGACAACATATGGAATGGCCGTGACCCCTTGGTATAACC  
TGAGGCCGACTGGCCCCGACTGATAAGGGACCTCACAGATGAGAGGGGAAACAGGCGTCTCCTCGTCT  
CGGGGGACGACAAGGTCTTTTCTTAAGGGGAGATGAGGCTAGGGTTTACGCCTCGTCGGCCTACCGG  
ATAAGTAACGAC

>MT302\_ON158834

GAGATCGAGTAAAGAAGTCAATGGACGCCACCGGCGCCGCTATAGCGGAAGACGTGGCGGGCTGGGAC  
ACCAAGATCTCCAAAGGACTGCTCACCTGGAGTCCCATATGTTACCAAGCTAGCGGAGGATGAAGA  
AATGGCGCGGGAGATCCACCACCTCTACCGACTCTACGCAGATCCACACATGGTGGTCCAGAGGGAGA  
TTGAAGGTGAGGTCCATGACGTACTCCTTAGGGGGAGGGGGCAGGTCTCCTCCGGGAGGCAGCCCACC  
TACGCGGCCAACACCATCACCAACTTCATAACGACAACATATGGAATGGCCGTGACCCCTTGGTATAACC  
TGAGGCCGACTGGCCCCGACTGATAAGGGACCTCACAGATGAGAGGGGAAACAGGCGTCTCCTCGTCT  
CGGGGGACGACAAGGTCTTTTCTTAAGGGGAGATGAGGCTAGGGTTTACGCCTCGTCGGCCTACCGG  
ATAAGTAACGAC

>MT297\_ON158835 -

GAGATCGAGTAAAGAAGTCAATGGACGCCACCGGCGCCGCTATAGCGGAAGACGTGGCGGGCTGGGAC  
ACCAAGATCTCCAAAGGACTGCTCACCTGGAGTCCCATATGTTACCAAGCTAGCGGAGGATGAAGA  
AATGGCGCGGGAGATCCACCACCTCTACCGACTCTACGCAGATCCACACATGGTGGTCCAGAGGGAGA  
TTGAAGGTGAGGTCCATGACGTACTCCTTAGGGGGAGGGGGCAGGTCTCCTCCGGGAGGCAGCCCACC  
TACGCGGCCAACACCATCACCAACTTCATAACGACAACATATGGAATGGCCGTGACCCCTTGGTATAACC  
TGAGGCCGACTGGCCCCGACTGATAAGGGACCTCACAGATGAGAGGGGAAACAGGCGTCTCCTCGTCT  
CGGGGGACGACAAGGTCTTTTCTTAAGGGGAGATGAGGCTAGGGTTTACGCCTCGTCGGCCTACCGG  
ATAAGTAACGAC

>MT306\_ON158836

GAGATCGAGTAAAGAAGTCAATGGACGCCACCGGCGCCGCTATAGCGGAAGACGTGGCGGGCTGGGAC  
ACCAAGATCTCCAAAGGACTGCTCACCTGGAGTCCCATATGTTACCAAGCTAGCGGAGGATGAAGA  
AATGGCGCGGGAGATCCACCACCTCTACCGACTCTACGCAGATCCACACATGGTGGTCCAGAGGGAGA  
TTGAAGGTGAGGTCCATGACGTACTCCTTAGGGGGAGGGGGCAGGTCTCCTCCGGGAGGCAGCCCACC  
TACGCGGCCAACACCATCACCAACTTCATAACGACAACATATGGAATGGCCGTGACCCCTTGGTATAACC  
TGAGGCCGACTGGCCCCGACTGATAAGGGACCTCACAGATGAGAGGGGAAACAGGCGTCTCCTCGTCT  
CGGGGGACGACAAGGTCTTTTCTTAAGGGGAGATGAGGCTAGGGTTTACGCCTCGTCGGCCTACCGG  
ATAAGTAACGAC

>MT294\_ON158837

GAGATCGAGTAAAGAAGTCAATGGACGCCACCGGCGCCGCTATAGCGGAAGACGTGGCGGGCTGGGAC  
ACCAAGATCTCCAAAGGACTGCTCACCTGGAGTCCCATATGTTACCAAGCTAGCGGAGGATGAAGA  
AATGGCGCGGGAGATCCACCACCTCTACCGACTCTACGCAGATCCACACATGGTGGTCCAGAGGGAGA  
TTGAAGGTGAGGTCCATGACGTACTCCTTAGGGGGAGGGGGCAGGTCTCCTCCGGGAGGCAGCCCACC  
TACGCGGCCAACACCATCACCAACTTCATAACGACAACATATGGAATGGCCGTGACCCCTTGGTATAACC  
TGAGGCCGACTGGCCCCGACTGATAAGGGACCTCACAGATGAGAGGGGAAACAGGCGTCTCCTCGTCT

CGGGGGACGACAAGGTCCTTTTCTTAAGGGGAGATGAGGCTAGGGTTTACGCCTCGTCGGCCTACCGG  
ATAAGTAACGAC

>MT308\_ON158838

GAGATCGAGTAAAGAAGTCAATGGACGCCACGGGCGCCGCTATAGCGGAAGACGTGGCGGGCTGGGAC  
ACCAAGATCTCCAAAGGACTGCTCACCCCGGAGTCCCATATGTTACCAAGCTAGCGGAGGATGAAGA  
AATGGCGCGGGAGATCCACCACCTCTACCGACTCTACGCAGATCCACACATGGTGGTCCAGAGGGAGA  
TTGAAGGTGAGGTCCATGACGTACTCCTTAGGGGGAGGGGGCAGGTCTCCTCCGGGAGGCAGCCCACC  
TACGCGGCCAACACCATCACCAACTTCATAACGACAACATATGGAATGGCCGTGACCCCTGGTATACC  
TGAGGCCGACTGGCCCCGACTGATAAGGGACCTCACAGATGAGAGGGGAAACAGGCGTCTCCTCGTCT  
CGGGGGACGACAAGGTCCTTTTCTTAAGGGGAGATGAGGCTAGGGTTTACGCCTCGTCGGCCTACCGG  
ATAAGTAACGAC

>MT304\_ON158839

GAGATCGAGTAAAGAAGTCAATGGACGCCACGGGCGCCGCTATAGCGGAAGACGTGGCGGGCTGGGAC  
ACCAAGATCTCCAAAGGACTGCTCACCCCTGGAGTCCCATATGTTACCAAGCTAGCGGAGGATGAAGA  
AATGGCGCGGGAGATCCACCACCTCTACCGACTCTACGCAGATCCACACATGGTGGTCCAGAGGGAGA  
TTGAAGGTGAGGTCCATGACGTACTCCTTAGGGGGAGGGGGCAGGTCTCCTCCGGGAGGCAGCCCACC  
TACGCGGCCAACACCATCACCAACTTCATAACGACAACATATGGAATGGCCGTGACCCCTGGTATACC  
TGAGGCCGACTGGCCCCGACTGATAAGGGACCTCACAGATGAGAGGGGAAACAGGCGTCTCCTCGTCT  
CGGGGGACGACAAGGTCCTTTTCTTAAGGGGAGATGAGGCTAGGGTTTACGCCTCGTCGGCCTACCGG  
ATAAGTAACGAC

>MT303\_ON158840

GAGATCGAGTAAAGAAGTCAATGGACGCCACGGGCGCCGCTATAGCGGAAGACGTGGCGGGCTGGGAC  
ACCAAGATCTCCAAAGGACTGCTCACCCCTGGAGTCCCATATGTTACCAAGCTAGCGGAGGATGAAGA  
AATGGCGCGGGAGATCCACCACCTCTACCGACTCTACGCAGATCCACACATGGTGGTCCAGAGGGAGA  
TTGAAGGTGAGGTCCATGACGTACTCCTTAGGGGGAGGGGGCAGGTCTCCTCCGGGAGGCAGCCCACC  
TACGCGGCCAACACCATCACCAACTTCATAACGACAACATATGGAATGGCCGTGACCCCTGGTATACC  
TGAGGCCGACTGGCCCCGACTGATAAGGGACCTCACAGATGAGAGGGGAAACAGGCGTCTCCTCGTCT  
CGGGGGACGACAAGGTCCTTTTCTTAAGGGGAGATGAGGCTAGGGTTTACGCCTCGTCGGCCTACCGG  
ATAAGTAACGAC

>MT298\_ON158841

GAGATCGAGTAAAGAAGTCAATGGACGCCACGGGCGCCGCTATAGCGGAAGACGTGGCGGGCTGGGAC  
ACCAAGATCTCCAAAGGACTGCTCACCCCTGGAGTCCCATATGTTACCAAGCTAGCGGAGGATGAAGA  
AATGGCGCGGGAGATCCACCACCTCTACCGACTCTACGCAGATCCACACATGGTGGTCCAGAGGGAGA  
TTGAAGGTGAGGTCCATGACGTACTCCTTAGGGGGAGGGGGCAGGTCTCCTCCGGGAGGCAGCCCACC  
TACGCGGCCAACACCATCACCAACTTCATAACGACAACATATGGAATGGCCGTGACCCCTGGTATACC  
TGAGGCCGACTGGCCCCGACTGATAAGGGACCTCACAGATGAGAGGGGAAACAGGCGTCTCCTCGTCT  
CGGGGGACGACAAGGTCCTTTTCTTAAGGGGAGATGAGGCTAGGGTTTACGCCTCGTCGGCCTACCGG  
ATAAGTAACGAC

>MT300\_ON158842

GAGATCGAGTAAAGAAGTCAATGGACGCCACGGGCGCCGCTATAGCGGAAGACGTGGCGGGCTGGGAC  
ACCAAGATCTCCAAAGGACTGCTCACCCCGGAGTCCCATATGTTACCAAGCTAGCGGAGGATGAAGA  
AATGGCGCGGGAGATCCACCACCTCTACCGACTCTACGCAGATCCACACATGGTGGTCCAGAGGGAGA  
TTGAAGGTGAGGTCCATGACGTACTCCTTAGGGGGAGGGGGCAGGTCTCCTCCGGGAGGCAGCCCACC



TACGCGGCCAACACCATCACCAACTTCATAACGACAACATATGGAATGGCCGTGACCCCTTGGTATACC  
TGAGGCCGACTGGCCCCGACTGATAAGGGACCTCACAGATGAGAGGGGAAACAGGCGTCTCCTCGTCT  
CGGGGGACGACAAGGTCTTTTCTTAAGGGGAGATGAGGCTAGGGTTTACGCCTCGTCGGCCTACCGG  
ATAAGTAACGAC

>MT305\_ON158843

GAGATCGAGTAAAGAAGTCAATGGACGCCACAGGCGCCGCTATAGCGGAAGACGTGGCGGGCTGGGAC  
ACCAAGATCTCCAAAGGACTGCTCACCCCGAGTCCCATATGTTACCAAGCTAGCGGAGGATGAAGA  
AATGGCGCGGGAGATCCACCACCTCTACCGACTCTACGCAGATCCACACATGGTGGTCCAGAGGGAGA  
TTGAAGGTGAGGTCCATGACGTACTCCTTAGGGGGAGGGGGCAGGTCTCCTCCGGGAGGCAGCCCACC  
TACGCGGCCAACACCATCACCAACTTCATAACGACAACATATGGAATGGCCGTGACCCCTTGGTATACC  
TGAGGCCGACTGGCCCCGACTGATAAGGGACCTCACAGATGAGAGGGGAAACAGGCGTCTCCTCGTCT  
CGGGGGACGACAAGGTCTTTTCTTAAGGGGAGATGAGGCTAGGGTTTACGCCTCGTCGGCCTACCGG  
ATAAGTAACGAC

>MT290\_ON158844

GAGATCGAGTAAAGAAGTCAATGGACGCCACCGGCGCCGCTATAGCGGAAGACGTGGCGGGCTGGGAC  
ACCAAGATCTCCAAAGGACTGCTCACCCCGAGTCCCATATGTTACCCAGCTAGCGGAGGATGAAGA  
AATGGCGCGGGAGATCCACCACCTCTACCGACTCTACGCAGATCCACACATGGTGGTCCAGAGGGAGA  
TTGAAGGTGAGGTCCATGACGTACTCCTTAGGGGGAGGGGGCAGGTCTCCTCCGGGAGGCAGCCCACC  
TACGCGGCCAACACCATCACCAACTTCATAACGACAACATATGGAATGGCCGTGACCCCTTGGTATACC  
TGAGGCCGACTGGCCCCGACTGATAAGGGACCTCACAGATGAGAGGGGAAACAGGCGTCTCCTCGTCT  
CGGGGGACGACAAGGTCTTTTCTTAAGGGGAGATGAGGCTAGGGTTTACGCCTCGTCGGCCTACCGG  
ATAAGTAACGAC

>MT295\_ON158845

TAAAGAAGTCAATGGACGCCACCGGCGCCGCTATAGCGGAAGACGTGGCGGGCTGGGACACCAAGATC  
TCCAAAGGACTGCTCACCCCTGGAGTCCCATATGTTACCAAGCTGGCGGAGGATGAAGAAATGGCGCG  
GGAGATCCACCACCTCTACCGACTCTACGCAGATCCACACATGGTGGTCCAGAGGGAGATTGAAGGTG  
AGGTCCATGACGTACTCCTTAGGGGGAGGGGGCAGGTCTCCTCCGGGAGGCAGCCCACCTACGCGGCC  
AACACCATCACCAACTTCATAACGACAACATATGGAATGGCCGTGACCCCTTGGTATACCCGAGGCCGA  
CTGGCCCCGACTGATAAGGGACCTCACAGATGAGAGGGGAAACAGGCGCCTCCTCGTCTCGGGGGACG  
ACAAGGTCTTTTCTTAAGGGGAGATGAGGCTAGGGTTTACGCCTCGTCGGCCTACCGGATAAGTAAC  
GAC

>MT293\_ON158846

GAGACCGGGTAAAGAAGTCAATGGACGCCACCGGCGCCGCTATAGCGGAAGACGTGGCGGGCTGGGAC  
ACTAAGATCTCCAAAGGACTACTCACCCCTGGAGTCCCATATGTTACCAAGCTGGCGGAGGATGAAGA  
AATGGCGCGGGAGATCCACCACCTCTACCGACTCTACGCAGATCCACACATGGTGGTCCAGAGGGAGA  
TTGAAGGTGAGGTCCATGACGTACTCCTTAGGGGGAGGGGGCAGGTCTCCTCCGGGAGGCAGCCCACC  
TACGCGGCCAACACCATCACCAACTTCATAACGACAACATATGGAATGGCCGTGACCCCTTGGTATACC  
CGAGGCCGACTGGCCCCGACTGATAAGGGACCTCACAGATGAGAGGGGAAACAGGCGCCTCCTCGTCT  
CGGGGGACGACAAGGTCTTTTCTTAAGAGGAGATGAGGCTAGGGTTTACGCCTCATCGGCCTACCGG  
ATAAGTAACGAC

>MT291\_ON158847

GAGACCGGGTAAAGAAGTCAATGGACGCCACCGGCGCCGCTATAGCGGAAGACGTGGCGGGCTGGGAC  
ACTAAGATCTCCAAAGGACTACTCACCCCTGGAGTCCCATATGTTACCAAGCTGGCGGAGGATGAAGA

AATGGCGCGGGAGATCCACCACCTCTACCGACTCTACGCAGATCCACACATGGTGGTCCAGAGGGAGA  
TTGAAGGTGAGGTCCATGACGTACTCCTTAGGGGGAGGGGGCAGGTCTCCTCCGGGAGGCAGCCCACC  
TACGCGGCCAACACCATCACCAACTTCATAACGACAACATATGGAATGGCCGTGACCCCTTGGTATAACC  
CGAGGCCGACTGGCCCCGACTGATAAGGGACCTCACAGATGAGAGGGGAAACAGGCGCCTCCTCGTCT  
CGGGGGACGACAAGGTCCTTTTCCTAAGAGGAGATGAGGCTAGGGTTTACGCCTCATCGGCCTACCGG  
ATAAGTAACGAC

>MT327\_ON158848

GAGACCGGTAAAGAAGTCAATGGACGCCACCGGCGCCGCTATAGCGGAAGACGTGGCGGGCTGGGAC  
ACTAAGATCTCCAAAGGACTACTCACCTGGAGTCCCATATGTTTACCAAGCTGGCGGAGGATGAAGA  
AATGGCGCGGGAGATCCACCACCTCTACCGACTCTACGCAGATCCACACATGGTGGTCCAGAGGGAGA  
TTGAAGGTGAGGTCCATGACGTACTCCTTAGGGGGAGGGGGCAGGTCTCCTCCGGGAGGCAGCCCACC  
TACGCGGCCAACACCATCACCAACTTCATAACGACAACATATGGAATGGCCGTGACCCCTTGGTATAACC  
CGAGGCCGACTGGCCCCGACTGATAAGGGACCTCACAGATGAGAGGGGAAACAGGCGCCTCCTCGTCT  
CGGGGGACGACAAGGTCCTTTTCCTAAGAGGAGATGAGGCTAGGGTTTACGCCTCATCGGCCTACCGG  
ATAAGTAACGAC

>MT307\_ON158849

GAGATCGAGTAAAGAAGTCAATGGACGCCACCGGCGCCGCTATAGCGGAAGACGTGGCGGGCTGGGAC  
ACCAAGATCTCCAAAGGACTGCTCACCTGGAGTCCCATATGTTTACCAAGCTAGCGGAGGATGAAGA  
AATGGCGCGGGAGATCCACCACCTCTACCGACTCTACGCAGATCCACACATGGTGGTCCAGAGGGAGA  
TTGAAGGTGAGGTCCATGACGTACTCCTTAGGGGGAGGGGGCAGGTCTCCTCCGGGAGGCAGCCCACC  
TACGCGGCCAACACCATCACCAACTTCATAACGACAACATATGGAATGGCCGTGACCCCTTGGTATAACC  
TGAGGCCGACTGGCCCCGACTGATAAGGGACCTCACAGATGAGAGGGGAAACAGGCGTCTCCTCGTCT  
CGGGGGACGACAAGGTCCTTTTCCTAAGGGGAGATGAGGCTAGGGTTTACGCCTCGTCGGCCTACCGG  
ATAAGTAACGAC

>MT161\_ON158850

GAGACCGAGTAAAGAAGTCAATGGACGCTACCGGCGCCGCTATAGCGGAAGACGTGGCGGGCTGGGAC  
ACAAAGATCTCCAAAGGACTGCTCACCTGGAGTCCCATATGTTTACCAAGCTGGCGGAGGATGAAGA  
AATGGCACGGGAGATCCACCACCTCTACCGACTCTACGCAGATCCACACATGGTGGTCCAGAGGGAGA  
TCGAAGGTGAAGTCCATGACGTACTCCTTAGGGGGAGGGGACAGGTCTCCTCCGGGAGGCAGCCCACC  
TACGCGGCCAACACCATCACCAACTTCATAACGACAACATATGGAATGGCCGTGACCCCTTGGTATAACC  
TGAGGCCGACTGGCCCCGACTGATAAGGGACCTCACAGATGAGAGGGGAAACAGGCGTCTCCTCGTCT  
CGGGGGACGACAAGGTCCTTTTCCTAAGGGGAGATGAGGCTAGGGTTTACGCCTCATCGGCCTACCGG  
ATAAGTAACGAC

>MT156\_ON158851

GAGACCGAGTAAAGAAGTCAATGGACGCTACCGGCGCCGCTATAGCGGAAGACGTGGCGGGCTGGGAC  
ACAAAGATCTCCAAAGGACTGCTCACCTGGAGTCCCATATGTTTACCAAGCTGGCGGAGGATGAAGA  
AATGGCACGGGAGATCCACCACCTCTACCGACTCTACGCAGATCCACACATGGTGGTCCAGAGGGAGA  
TCGAAGGTGAAGTCCATGACGTACTCCTTAGGGGGAGGGGACAGGTCTCCTCCGGGAGGCAGCCCACC  
TACGCGGCCAACACCATCACCAACTTCATAACGACAACATATGGAATGGCCGTGACCCCTTGGTATAACC  
TGAGGCCGACTGGCCCCGACTGATAAGGGACCTCACAGATGAGAGGGGAAACAGGCGTCTCCTCGTCT  
CGGGGGACGACAAGGTCCTTTTCCTAAGGGGAGATGAGGCTAGGGTTTACGCCTCATCGGCCTACCGG  
ATAAGTAACGAC

>MT150\_ON158852

GAGACCGAGTAAAGAAGTCAATGGACGCTACCGGCGCCGCTATAGCGGAAGACGTGGCGGGCTGGGAC  
ACAAAGATCTCCAAAGGACTGCTCACCCTGGAGTCCCATATGTTACCAAGCTGGCGGAGGATGAAGA  
AATGGCACGGGAGATCCACCACCTCTACCGACTCTACGCAGATCCACACATGGTGGTCCAGAGGGAGA  
TCGAAGGTGAAGTCCATGACGTACTCCTTAGGGGGAGGGGACAGGTCTCCTCCGGGAGGCAGCCCACC  
TACGCGGCCAACACCATCACCAACTTCATAACGACAACATATGGAATGGCCGTGACCCCTTGGTATACC  
TGAGGCCGACTGGCCCCGACTGATAAGGGACCTCACAGATGAGAGGGGAAACAGGCGTCTCCTCGTCT  
CGGGGGACGACAAGTCTTTTTCTTAAGGGGAGATGAGGCTAGGGTTTACGCCTCATCGGCCTACCGG  
ATAAGTAACGAC

>MT152\_ON158853

GAGACCGAGTAAAGAAGTCAATGGACGCTACCGGCGCCGCTATAGCGGAAGACGTGGCGGGCTGGGAC  
ACAAAGATCTCCAAAGGACTGCTCACCCTGGAGTCCCATATGTTACCAAGCTGGCGGAGGATGAAGA  
AATGGCACGGGAGATCCACCACCTCTACCGACTCTACGCAGATCCACACATGGTGGTCCAGAGGGAGA  
TCGAAGGTGAAGTCCATGACGTACTCCTTAGGGGGAGGGGACAGGTCTCCTCCGGGAGGCAGCCCACC  
TACGCGGCCAACACCATCACCAACTTCATAACGACAACATATGGAATGGCCGTGACCCCTTGGTATACC  
TGAGGCCGACTGGCCCCGACTGATAAGGGACCTCACAGATGAGAGGGGAAACAGGCGTCTCCTCGTCT  
CGGGGGACGACAAGTCTTTTTCTTAAGGGGAGATGAGGCTAGGGTTTACGCCTCATCGGCCTACCGG  
ATAAGTAACGAC

>MT148\_ON158854

GAGACCGAGTAAAGAAGTCAATGGACGCTACCGGCGCCGCTATAGCGGAAGACGTGGCGGGCTGGGAC  
ACAAAGATCTCCAAAGGACTGCTCACCCTGGAGTCCCATATGTTACCAAGCTGGCGGAGGATGAAGA  
AATGGCACGGGAGATCCACCACCTCTACCGACTCTACGCAGATCCACACATGGTGGTCCAGAGGGAGA  
TCGAAGGTGAAGTCCATGACGTACTCCTTAGGGGGAGGGGACAGGTCTCCTCCGGGAGGCAGCCCACC  
TACGCGGCCAACACCATCACCAACTTCATAACGACAACATATGGAATGGCCGTGACCCCTTGGTATACC  
TGAGGCCGACTGGCCCCGACTGATAAGGGACCTCACAGATGAGAGGGGAAACAGGCGTCTCCTCGTCT  
CGGGGGACGACAAGTCTTTTTCTTAAGGGGAGATGAGGCTAGGGTTTACGCCTCATCGGCCTACCGG  
ATAAGTAACGAC

>MT157\_ON158855

GAGACCGAGTAAAGAAGTCAATGGACGCTACCGGCGCCGCTATAGCGGAAGACGTGGCGGGCTGGGAC  
ACAAAGATCTCCAAAGGACTGCTCACCCTGGAGTCCCATATGTTACCAAGCTGGCGGAGGATGAAGA  
AATGGCACGGGAGATCCACCACCTCTACCGACTCTACGCAGATCCACACATGGTGGTCCAGAGGGAGA  
TCGAAGGTGAAGTCCATGACGTACTCCTTAGGGGGAGGGGACAGGTCTCCTCCGGGAGGCAGCCCACC  
TACGCGGCCAACACCATCACCAACTTCATAACGACAACATATGGAATGGCCGTGACCCCTTGGTATACC  
TGAGGCCGACTGGCCCCGACTGATAAGGGACCTCACAGATGAGAGGGGAAACAGGCGTCTCCTCGTCT  
CGGGGGACGACAAGTCTTTTTCTTAAGGGGAGATGAGGCTAGGGTTTACGCCTCATCGGCCTACCGG  
ATAAGTAACGAC

>MT153\_ON158856

GAGACCGAGTAAAGAAGTCAATGGACGCTACCGGCGCCGCTATAGCGGAAGACGTGGCGGGCTGGGAC  
ACAAAGATCTCCAAAGGACTGCTCACCCTGGAGTCCCATATGTTACCAAGCTGGCGGAGGATGAAGA  
AATGGCACGGGAGATCCACCACCTCTACCGACTCTACGCAGATCCACACATGGTGGTCCAGAGGGAGA  
TCGAAGGTGAAGTCCATGACGTACTCCTTAGGGGGAGGGGACAGGTCTCCTCCGGGAGGCAGCCCACC  
TACGCGGCCAACACCATCACCAACTTCATAACGACAACATATGGAATGGCCGTGACCCCTTGGTATACC  
TGAGGCCGACTGGCCCCGACTGATAAGGGACCTCACAGATGAGAGGGGAAACAGGCGTCTCCTCGTCT  
CGGGGGACGACAAGTCTTTTTCTTAAGGGGAGATGAGGCTAGGGTTTACGCCTCATCGGCCTACCGG  
ATAAGTAACGAC

>MT147\_ON158857

GAGACCGAGTAAAGAAGTCAATGGACGCTACCGGCGCCGCTATAGCGGAAGACGTGGCGGGCTGGGAC  
ACAAAGATCTCCAAAGGACTGCTCACCCCTGGAGTCCCATATGTTACCAAGCTGGCGGAGGATGAAGA  
AATGGCACGGGAGATCCACCACCTCTACCGACTCTACGCAGATCCACACATGGTGGTCCAGAGGGAGA  
TCGAAGGTGAAGTCCATGACGTACTCCTTAGGGGGAGGGGACAGGTCTCCTCCGGGAGGCAGCCCACC  
TACGCGGCCAACACCATCACCAACTTCATAACGACAACATATGGAATGGCCGTGACCCCTTGGTATAACC  
TGAGGCCGACTGGCCCCGACTGATAAGGGACCTCACAGATGAGAGGGGAAACAGGCGTCTCCTCGTCT  
CGGGGGACGACAAGGTCTTTTCTTAAGGGGAGATGAGGCTAGGGTTTACGCCTCATCGGCCTACCGG  
ATAAGTAACGAC

>MT146\_ON158858

GAGACCGAGTAAAGAAGTCAATGGACGCTACCGGCGCCGCTATAGCGGAAGACGTGGCGGGCTGGGAC  
ACAAAGATCTCCAAAGGACTGCTCACCCCTGGAGTCCCATATGTTACCAAGCTGGCGGAGGATGAAGA  
AATGGCACGGGAGATCCACCACCTCTACCGACTCTACGCAGATCCACACATGGTGGTCCAGAGGGAGA  
TCGAAGGTGAAGTCCATGACGTACTCCTTAGGGGGAGGGGACAGGTCTCCTCCGGGAGGCAGCCCACC  
TACGCGGCCAACACCATCACCAACTTCATAACGACAACATATGGAATGGCCGTGACCCCTTGGTATAACC  
TGAGGCCGACTGGCCCCGACTGATAAGGGACCTCACAGATGAGAGGGGAAACAGGCGTCTCCTCGTCT  
CGGGGGACGACAAGGTCTTTTCTTAAGGGGAGATGAGGCTAGGGTTTACGCCTCATCGGCCTACCGG  
ATAAGTAACGAC

>MT155\_ON158859

GAGACCGAGTAAAGAAGTCAATGGACGCTACCGGCGCCGCTATAGCGGAAGACGTGGCGGGCTGGGAC  
ACAAAGATCTCCAAAGGACTGCTCACCCCTGGAGTCCCATATGTTACCAAGCTGGCGGAGGATGAAGA  
AATGGCACGGGAGATCCACCACCTCTACCGACTCTACGCAGATCCACACATGGTGGTCCAGAGGGAGA  
TCGAAGGTGAAGTCCATGACGTACTCCTTAGGGGGAGGGGACAGGTCTCCTCCGGGAGGCAGCCCACC  
TACGCGGCCAACACCATCACCAACTTCATAACGACAACATATGGAATGGCCGTGACCCCTTGGTATAACC  
TGAGGCCGACTGGCCCCGACTGATAAGGGACCTCACAGATGAGAGGGGAAACAGGCGTCTCCTCGTCT  
CGGGGGACGACAAGGTCTTTTCTTAAGGGGAGATGAGGCTAGGGTTTACGCCTCATCGGCCTACCGG  
ATAAGTAACGAC

>MT154\_ON158860

GAGACCGAGTAAAGAAGTCAATGGACGCTACCGGCGCCGCTATAGCGGAAGACGTGGCGGGCTGGGAC  
ACAAAGATCTCCAAAGGACTGCTCACCCCTGGAGTCCCATATGTTACCAAGCTGGCGGAGGATGAAGA  
AATGGCACGGGAGATCCACCACCTCTACCGACTCTACGCAGATCCACACATGGTGGTCCAGAGGGAGA  
TCGAAGGTGAAGTCCATGACGTACTCCTTAGGGGGAGGGGACAGGTCTCCTCCGGGAGGCAGCCCACC  
TACGCGGCCAACACCATCACCAACTTCATAACGACAACATATGGAATGGCCGTGACCCCTTGGTATAACC  
TGAGGCCGACTGGCCCCGACTGATAAGGGACCTCACAGATGAGAGGGGAAACAGGCGTCTCCTCGTCT  
CGGGGGACGACAAGGTCTTTTCTTAAGGGGAGATGAGGCTAGGGTTTACGCCTCATCGGCCTACCGG  
ATAAGTAACGAC

>MT159\_ON158861

GAGACCGAGTAAAGAAGTCAATGGACGCTACCGGCGCCGCTATAGCGGAAGACGTGGCGGGCTGGGAC  
ACAAAGATCTCCAAAGGACTGCTCACCCCTGGAGTCCCATATGTTACCAAGCTGGCGGAGGATGAAGA  
AATGGCACGGGAGATCCACCACCTCTACCGACTCTACGCAGATCCACACATGGTGGTCCAGAGGGAGA  
TCGAAGGTGAAGTCCATGACGTACTCCTTAGGGGGAGGGGACAGGTCTCCTCCGGGAGGCAGCCCACC  
TACGCGGCCAACACCATCACCAACTTCATAACGACAACATATGGAATGGCCGTGACCCCTTGGTATAACC  
TGAGGCCGACTGGCCCCGACTGATAAGGGACCTCACAGATGAGAGGGGAAACAGGCGTCTCCTCGTCT

CGGGGGACGACAAGGTCCTTTTCTTAAGGGGAGATGAGGCTAGGGTTTACGCCTCATCGGCCTACCGG  
ATAAGTAACGAC

>MT151\_ON158862

GAGACCGAGTAAAGAAGTCAATGGACGCTACGGGCGCCGCTATAGCGGAAGACGTGGCGGGCTGGGAC  
ACAAAGATCTCCAAAGGACTGCTCACCCCTGGAGTCCCATATGTTACCAAGCTGGCGGAGGATGAAGA  
AATGGCACGGGAGATCCACCACCTCTACCGACTCTACGCAGATCCACACATGGTGGTCCAGAGGGAGA  
TCGAAGGTGAAGTCCATGACGTACTCCTTAGGGGGAGGGGACAGGTCTCCTCCGGGAGGCAGCCCACC  
TACGCGGCCAACACCATCACCAACTTCATAACGACAACATATGGAATGGCCGTGACCCCTGGTATAACC  
TGAGGCCGACTGGCCCCGACTGATAAGGGACCTCACAGATGAGAGGGGAAACAGGCGTCTCCTCGTCT  
CGGGGGACGACAAGGTCCTTTTCTTAAGGGGAGATGAGGCTAGGGTTTACGCCTCATCGGCCTACCGG  
ATAAGTAACGAC

>MT160\_ON158863

GAGACCGAGTAAAGAAGTCAATGGACGCTACGGGCGCCGCTATAGCGGAAGACGTGGCGGGCTGGGAC  
ACAAAGATCTCCAAAGGACTGCTCACCCCTGGAGTCCCATATGTTACCAAGCTGGCGGAGGATGAAGA  
AATGGCACGGGAGATCCACCACCTCTACCGACTCTACGCAGATCCACACATGGTGGTCCAGAGGGAGA  
TCGAAGGTGAAGTCCATGACGTACTCCTTAGGGGGAGGGGACAGGTCTCCTCCGGGAGGCAGCCCACC  
TACGCGGCCAACACCATCACCAACTTCATAACGACAACATATGGAATGGCCGTGACCCCTGGTATAACC  
TGAGGCCGACTGGCCCCGACTGATAAGGGACCTCACAGATGAGAGGGGAAACAGGCGTCTCCTCGTCT  
CGGGGGACGACAAGGTCCTTTTCTTAAGGGGAGATGAGGCTAGGGTTTACGCCTCATCGGCCTACCGG  
ATAAGTAACGAC

>MT149\_ON158864

GAGACCGAGTAAAGAAGTCAATGGACGCTACGGGCGCCGCTATAGCGGAAGACGTGGCGGGCTGGGAC  
ACAAAGATCTCCAAAGGACTGCTCACCCCTGGAGTCCCATATGTTACCAAGCTGGCGGAGGATGAAGA  
AATGGCACGGGAGATCCACCACCTCTACCGACTCTACGCAGATCCACACATGGTGGTCCAGAGGGAGA  
TCGAAGGTGAAGTCCATGACGTACTCCTTAGGGGGAGGGGACAGGTCTCCTCCGGGAGGCAGCCCACC  
TACGCGGCCAACACCATCACCAACTTCATAACGACAACATATGGAATGGCCGTGACCCCTGGTATAACC  
TGAGGCCGACTGGCCCCGACTGATAAGGGACCTCACAGATGAGAGGGGAAACAGGCGTCTCCTCGTCT  
CGGGGGACGACAAGGTCCTTTTCTTAAGGGGAGATGAGGCTAGGGTTTACGCCTCATCGGCCTACCGG  
ATAAGTAACGAC

>MT158\_ON158865

GAGACCGAGTAAAGAAGTCAATGGACGCAACCGGCGCCGCTATAGCGGAAGACGTGGCGGGCTGGGAC  
ACAAAGATCTCCAAAGGACTGCTCACCCCTGGAGTCCCATATGTTACCAAGCTGGCGGAGGATGAAGA  
AATGGCACGGGAGATCCACCACCTCTACCGACTCTACGCAGATCCACACATGGTGGTCCAGAGGGAGA  
TCGAAGGTGAAGTCCATGACGTACTCCTTAGGGGGAGGGGACAGGTCTCCTCCGGGAGGCAGCCCACC  
TACGCGGCCAACACCATCACCAACTTCATAACGACAACATATGGAATGGCCGTGACCCCTGGTATAACC  
TGAGGCCGACTGGCCCCGACTGATAAGGGACCTCACAGATGAGAGGGGAAACAGGCGTCTCCTCGTCT  
CGGGGGACGACAAGGTCCTTTTCTTAAGGGGAGATGAGGCTAGGGTTTACGCCTCATCGGCCTACCGG  
ATAAGTAACGAC

>MT309\_ON158866

GAGACCGAGTAAAGAAGTCAATGGACGCCACGGGCGCCGCTATAGCGGAAGACGTGGCGGGCTGGGAC  
ACAAAGATCTCCAAAGGACTGCTCACCCCGGAGTCCCACATGTTACCAAGTGGGCGGAGGATGAAGA  
AATGGCGCGGGAGATCCACCACCTCTACCGACTCTACGCAGATCCACACATGGTGGTCCAGAGGGAGA  
TTGAAGGTGAAGTCCATGACGTACTCCTTAGGGGGAGGGGGACAGGTCTCCTCCGGGAGGCAGCCCACC

TACGCGGCCAACACCATCACCAACTTCATAACGACAACATATGGAATGGCCGTGACCCCTTGGTATACC  
TGAGGCCGACTGGCCCCGACTGATAAGGGACCTCACAGATGAGAGGGGAAACAGGCGTCTCCTCGTCT  
CGGGGGACGACAAGGTCTTTTCTTAAGGGGAGATGAGGCTAGGATCTACGCCTCATCGGCCTACCGG  
ATAAGTAACGAC

>MT329\_ON158867

GAGATCGAGTAAAGAAGTCAATGGACGCTACCGGCGCCGCTATAGCGGAAGACGTGGCGGGCTGGGAC  
ACAAAGATCTCCAAAGGACTGCTCACCCCTGGAGTCCCACATGTTACCAAGCTGGCGGAGGATGAAGA  
AATGGCGCGGGAGATCCACCACCTCTACCGACTCTACGCAGATCCACACATGGTGGTCCAGAGGGAGA  
TTGAAGGTGAAGTTCATGACGTACTCCTTAGGGGGAGGGGGCAGGTCTCTTCCGGGAGGCAGCCCACC  
TACGCGGCCAACACCATCACCAACTTCATAACGACAACATATGGAATGGCCGTGACCCCTTGGTATACC  
TGAGGCCGACTGGCCCCGACTGGTAAGGGACCTCACAGATGAGAGGGGAAACAGGCGTCTCCTCGTCT  
CGGGGGACGACAAGGTCTTTTCTTAAGGGGAGATGAGGCTAGGGCTTATGCCTCATCGGCCTACCGG  
ATAAGTAACGAC

>MT328\_ON186499

TTAAGGAATCCGCCTCAGACTCAAACGCAGACGAAACAACAAGACAGATAATCGTAAGAAATACA  
ATGGACACAGACACCGTGATCGCTGGATTGGCCATGGTGATGCTTATTCTGCTGGCTACGCTCCTGCA  
GATGGCATCACACTACAGAGAACATGCCACCTTCATCTACACCCCAGGAGGAAAGCTGGAGGAGTATA  
AAGGAGATGGGCTCAAAGTATGGAGGTTAGAGCCACGTTGGGGGATCCGACCGAAGTGGGTAGGCAG  
GCAAAGAAAGAGATGAACGCCATGACCTATGAGGAATTCGATAGAATGAAGTTCAGGGGAGTGGTGGC  
CGAAGTGTTTCGAGGAGATAAAACCATCAAAGGGCTACGATAAACTCAGGATACTACTAGACATAATGG  
ACAGACCCAAGTTAGGAACGACGGTTGACCTTTGCGCGGGCCGAGGGGGCTGGAGCCAGCTAGTCAGA  
GAGCTAGAGGGACAGGCGACATCACCGCTGTCTCCCTATGGGAGAGAGGTAGAGAGGAATGGATGGC  
TGACCCCGCCATAAGGAGGATCAATGCCAATGTGAAGAATGTCAAGCCCTGGCGTGTAGATACGTTAC  
TATTCGACGGGGGGGAGACCTTCAAAGGGACCAAACATCATGAAGGAAGAGAGCTACAACGACGCC  
CTACTGGACGCTGTGGACGCATGGATGATGCAGGCCACACCTCCCAAAACTTCGTGATAAAAATACA  
GGTTCCCTATACACAAAAGCGATGAGACTCATAGAAAAGTGGCAAGTGAAAACCAAGAAGGGAAGAC  
TGGTTAGGCTGGCGGGAGACAGGCTGTCTAATACCGTGATGTACTTCATATCAGATAGGCTGGAAACA  
CAGATTCGGGGAAGAATAACCAGCTTCCCTCAGGGAGCTCCGGGAGCGAAGAGCGGACAGATCTCTGAC  
GTCTGACCCGGCCCTGCAATACGAACGCATAACGCCAGAGTGGACAGCAGAGGCTGTGATCGAGGGGT  
GTGCCCCACTCACACCGCTGAACATGACTAGATCTATAGCAGAGATGCATATGGAACACCCACCCTTG  
GGGATAACCAGATTCTTCAAAGAGCTCGGCTACAAGATTGCAAAAAGAAGGGCTCAGAGGGCACGCG  
AAGAAACAGGTTTCGTGGGCCAGCTCATAGAGCCCCTAAGACGAGTGCTAGAACGACATCACCTCTTCG  
GAGCATGGCAACTCACTTCGACAACACCTCGAGCCGTGTTCAACATCTTCAGAAGCAAGGTGGACAGG  
GCTCCGGTGGAGCTCCACTCGCACTATCCGGGACTAAGAAAGATGTACGACATTCTCGCTGACCTCTG  
GCTGGAGAGGTACGGAAGCATGAAGCGATTAACCGAAGATGAGATGGCCTCAGCGATAAACAGGAGAG  
GTGCCATGGGTTACCAGATGGACAACAGGAACTACGGAGACCTCGGGGCCTACTGGGACTCGGGGGAC  
TGGAGACAAGATGTCAACACGTTCAAGAGGGCTCTGCTCAGTGGAACACCGACTCACGCTGTTTACAA  
TACCACCGCAAAGAAGGAAAAAACAAGAATTTGACCAGGCAGGTGAACAAAGGAAGCCGCATAATCC  
AGTACTTACCTGCGGACGCCCCGGCTCTACGAGCTGAAAGTGCTGGGCGGGCTGCACAAGTATCTGGAG  
AAGTGCGGATGGAGTGTGGCGGGACAGGGCCTGTACAAGTACGGAGATCGAGTAAAGAAGTCAATGGA  
CGCTACCGGCGCCGCTATAGCGGAAGACGTGGCGGGCTGGGACACAAAGATCTCAAAGGACTGCTCA  
CCCTGGAGTCCCACATGTTACCAAGCTGGCGGAGGATGAAGAAATGGCGCGGGAGATCCACCACCTC  
TACCGACTCTACGCAGATCCACACATGGTGGTCCAGAGGGAGATTGAAGGTGAAGTTCATGACGTACT  
CCTTAGGGGGAGGGGGCAGGTCTCTTCCGGGAGGCAGCCCACCTACGCGGCCAACACCATCACCAACT  
TCATAACGACAACATATGGAATGGCCGTGACCCCTTGGTATACCTGAGGCCGACTGGCCCCGACTGGTA

AGGGACCTCACAGATGAGAGGGGAAACAGGCGTCTCCTCGTCTCGGGGGACGACAAGGTTCTTTTCTT  
AAGAGGAGATGAGGCTAGGGCTTATGCCTCATCGGCCTACCGGATAAGTAACGACATGGGACTGGTGA  
GAAAGGACATGGCCCTGGAACAGGAATCTGAGATCATTGTGGACGTGAAAGAAATATCCTTCTGCTCC  
CACAGGTACTGGCCGGTGAAGTACGGCAATGAGACTCACTACATGCCGGTCAGGGACGTGGGGGAGAT  
CTTCGCCAAGGCCACCATGGCCTTGGGCGTCTACAAGGATGACATGACCCAGGAGGCGTGGGCTAGAG  
TGCAAGGCCTTAACATGCTGGTGAACCTACCATCACATCCCAGAATGCAGAATGTTGGCTCTGGCCATC  
CTCTCGGTGACACGGATCGGCCTAAACCTGAAAGGGATCACCAAGGGCTGGATGATGAGCACCGAGTG  
GCTTAGAGACGACTTAGACACCAGACACCATCCACGCTCTCATCACCGAAGGGAGAACCTCGGGATGGG  
ACCAATTAGGCTACGTGGATTTTAAGGATAGGAAGGGTATCCTACTACGACCCGATGCTAGCTACAAG  
AACTGGAGGAGAGACCTCCCTGGAAGAGTGCGACAACCTCAGGGAGGATGGACAATACAAGGATTGGCT  
ACAGAGGATGGCAGTGTTCGGTTAGAGACTAACCACACCGACACGAAACACACACAAACACACTAGAG  
TAGAGCGCCCTGGAAGAACAGGTTGCGGTGTTAGCGCCACCGTACATAAATACGACAAAACCTGAATT  
GGGGGAAAAAGCAAAATCTGCGGTATCTGCAGGCAGCGACTAAGGG

>MT308\_ON186500

TTAAGGAATCCGCCTCAGACTCAAACGCAGACAAAACAACAACAAGACAGACAATCGTAAGAAATACA  
ATGGACACAGACACCGTGATCGCTGGGTTGGCCATGGTGATGCTTATTCTGCTGGCTACGCTCCTGCA  
GATGGCATCACACTACAGAGAACATGCCACCTTCATCTACACCCCAGGAGGAAAGCTGGAGGAGTATA  
AAGGAGATGGGCTCAAAGTGTGGAGGTTAGAGCCACGTTGGGGGATCCGACCGAACTGGGTAGGCAG  
GCAAAGAAAGAGATGAACGCCATGACCTATGAGGAATTTGACAGAATGAAGTTCAGGGGAGTGGTGGC  
CGAAGTGTACGCAGGAGATAAACCATCAAAGGGCTACGATAAACTTAGGATACTACTAGACATAATGG  
ACAGACCCAAGTTGGGAACGACGGTTGACCTTTGCGCGGGCCGAGGGGGCTGGAGCCAGCTAGTTAGA  
GAGCTAGAGGGACCAGGCGAAAATCACTGCTGTCTCCCTATGGGAGAGAGGTAGAGAGGAATGGATGGC  
TGACCCCGCTATAAGGAGAATCAATGCCAATGTGAAGAATGTCAAGCCCTGGCGTGTAGACACGTTAC  
TATTCGACGGGGGGGAGACCTTCAAAGGGGACAAAACATCATGAAGGAAGAGAGCTACAACGACGCC  
CTACTGGATGTTGTGGACGCATGGATGATGCAGGCCACACCTCCCACAACTTTTGTGATAAAAATACA  
GGTTCCCTATACACAAAAGCGATGAGACTCATAGAAAAGTGGCAAGTGAAAACCAAGAAGGGAAGAC  
TGGTTAGGCTGGCGGGAGACAGGCTGTCCAACACTGTGATGTACTTTATATCAGATAGGCTGGAAACG  
CAGATTCGGGGAAGAATAACCAGCTTCCTCAGGGAGCTCCGGGAGCGAAGAGCGGACAGATCTCTGAC  
GTCTGACCCGGCCCTGCAATACGAACGCATAGCGCCGGAGTGGACAGCAGAGGCTGTGATTGAGGGGT  
GCGCCCCACTCACACCGCTGAACATGACCAGATCTATAGCAGAGATGCATATGGAATACCCACCTTTG  
GGGATAACCAGATTCTTCAAAGAGCTCGGTTACAAGATCGCAAAAAGAAGGGCTCAGAAGGCACGCG  
AAGAAACAGGTTCTGTTGGGCCAGCTCATAGAGCCCCTAAGACGAGTGCTAGAACGACACCACCTCTTCG  
GAGCATGGCAACTCACTTCGACAACACCTCGAGCCGTGTTCAATATCTTCAGAAGTAAAGTGGACAGG  
GCTCCGGTGGAGCTCCACTCGCACTATCCGGGACTAAGAAAGATGTACGACATTCTCGCTGACCTCTG  
GCTGGAAGGTACGGAAGCATGAAGCGACTAACCGAAGATGAGATGGCCTCAGCGATAAACAGGAGAG  
GTGCCATGGGTTACCAGATGGACAACAGGAACCTACGGAGACCTCGGGGCCTACTGGGACTCGGGGGAC  
TGGAGACAAGACGTCAACACGTTCCAGGAGGGCTCTGCTCAGTGGAACACCGACTCACGCTGTTTACAA  
CACCACCGCAAAGAAGGAAAAAACAAAGAATTTGACCAGACAGGTGAACAAAGGAAGCCGCATAATCC  
AGTACTTACCTGCAGACGCCCCGGCTCTATGAGCTGAAAGTGCTGGGCGGGCTGCACAAGTATCTGGAG  
AAGTGCGGATGGAGTGTGGCGGGACAGGGCCTGTACAAGTACGGAGATCGAGTAAAGAAGTCAATGGA  
CGCCACCGGCGCCGCTATAGCGGAAGACGTGGCGGGCTGGGACACCAAGATCTCCAAAGGACTGCTCA  
CCCTGGAGTCCCATATGTTTACCAAGCTAGCGGAGGATGAAGAAATGGCGCGGGAGATCCACCACCTC  
TACCGACTCTACGCAGATCCACACATGGTGGTCCAGAGGGAGATTGAAGGTGAGGTCCATGACGTACT  
CCTTAGGGGGAGGGGGCAGGTCTCCTCCGGGAGGCAGCCACCTACGCGGCCAACACCATCACCAACT  
TCATAACGACAACATATGGAATGGCCGTGACCTTGGTATACCTGAGGCCGACTGGCCCCGACTGATA  
AGGGACCTCACAGATGAGAGGGGAAACAGGCGTCTCCTCGTCTCGGGGGACGACAAGGTCCTTTTCTT  
AAGGGGAGATGAGGCTAGGGTTACGCCTCGTCGGCCTACCGGATAAGTAACGACATGGGACTGGTGA

GAAAGGACATGGCCCTGGAACAGGAATCTGAGATCATTGTGGACGTGAAAGAAATATCCTTCTGCTCC  
CACAGGTACTGGCCGGTGAAGTACGGCAATGAGATTCACTACATGCCGGTCAGGGACGTGGGGGAGAT  
CTTTGCCAAGGCCACCATGGCCTTGGGCGTCTACAAGGACGACATGACCCAGGAGGCGTGGGCTAGAG  
TGCAAGGCCTTAACATGCTGGTGAACATACCATCACATTCCAGAATGCAGAATGTTGGCTCTGGCCATC  
CTCTCAGTGACACGGATCGGCCTAAACCTGAAAGGGATCACCAAGGGCTGGATGATGAGCACCGAGTG  
GCTTAGAGACGACTTAGCACCAGACACCATCCACGCTCTCATCACCGAAGGGAGAACCTCGGGGTGGG  
ACCAATTAGGCTACGTGGATTTCAAGGATAGGAAGGGTATCCTACTACGACCTGATGCCAGCTACAAG  
AACTGGAGGAGAGACCTCCCTGAAAAAGTGCGACAACCTCAGGGAGGATGGACAATACAAGGACTGGTT  
ACAGAGGATGGCAGTGTGTTGGTTAGAGACCGATCACACCGACACGAAACACACACAAACACACTAGAG  
TAGAGCGCCCTGGAAAAACCAGTTGCGGTGTTAGCGCCACCGTGCATGAATACGACAAAACCTGAATT  
GGGGGAAAAAGTAAAATCTGCGGTATCTGCAGGCAGCGACTAAGGG

>MT297\_ON186501

TTAAGGAATCCGCCTCAGACTCAAACGCAGACAAAACAACAACAAGACAGACAATCGTAAGAAATACA  
ATGGACACAGACACCGTGATCGCTGGGTGGCCATGGTGATGCTTATTCTGCTGGCTACGCTCCTGCA  
GATGGCATCACACTACAGAGAACATGCCACCTTCATCTACACCCCAGGAGGAAAGCTGGAGGAGTATA  
AAGGAGATGGGCTCAAAGTGTGGAGTTAGAGCCACGTTGGGGGATCCGACCGAACTGGGTAGGCAG  
GCAAAGAAAGAGATGAACGCCATGACCTATGAGGAATTTGACAGAATGAAGTTCAGGGGAGTGGTGGC  
CGAAGTGTACGCAGGAGATAAACCATCAAAGGGCTACGATAAACTTAGGATACTACTAGACATAATGG  
ACAGACCCAAGTTGGGAACGACGGTTGACCTTTGCGCGGGCCGAGGGGGCTGGAGCCAGCTAGTTAGA  
GAGCTAGAGGGACCAGGCGAAATCACTGCTGTCTCCCTATGGGAGAGAGGTAGAGAGGAATGGATGGC  
TGACCCCGCTATAAGGAGAATCAATGCCAATGTGAAGAATGTCAAGCCCTGGCGTGTAGACACGTTAC  
TATTCGACGGGGGGGAGACCTTCAAAGGGGACCAAACATCATGAAGGAAGAGAGCTACAACGACGCC  
CTACTGGATGTTGTGGACGCATGGATGATGCAGGCCACACCTCCACAAACTTTGTGATAAAAATACA  
GGTTCCTTATACACAAAAAGCGATGAGACTCATAGAAAAGTGGCAAGTGAAAACCAAGAAGGGAAGAC  
TGGTTAGGCTGGCGGGAGACAGGCTGTCCAACACTGTGATGTACTTTATATCAGATAGGCTGGAAACG  
CAGATTCGGGGAAGAATAACCAGCTTCCTCAGGGAGCTCCGGGAGCGAAGAGCGGACAGATCTCTGAC  
GTCTGACCCGGCCCTGCAATACGAACGCATAGCGCCGGAGTGGACAGCAGAGGCTGTGATTGAGGGGT  
GCGCCCCACTCACACCGCTGAACATGACCAGATCTATAGCAGAGATGCATATGGAATACCCACCTTTG  
GGGATAACCAGATTCTTCAAAGAGCTCGGTTACAAGATCGCAAAAAGAAGGGCTCAGAAGGCACGCG  
AAGAAACAGGTTTCGTGGGCCAGCTCATAGAGCCCCTAAGACGAGTGCTAGAACGACACCACCTCTTCG  
GAGCATGGCAACTCACTTCGACAACACCTCGAGCCGTGTTCAATATCTTCAGAAGTAAAGTGGACAGG  
GCTCCGGTGGAGCTCCACTCGCACTATCCGGGACTAAGAAAGATGTACGACATTCTCGCTGACCTCTG  
GCTGGAAAGGTACGGAAGCATGAAGCGACTAACCGAAGATGAGATGGCCTCAGCGATAAACAGGAGAG  
GTGCCATGGGTTACCAGATGGACAACAGGAACTACGGAGACCTCGGGGCCTACTGGGACTCGGGGGAC  
TGGAGACAAGACGTCAACACGTTTCAGGAGGGCTCTGCTCAGTGGAAACACCGACTCACGCTGTTTACAA  
CACCACCGCAAAGAAGGAAAAAACAAGAATTTGACCAGACAGGTGAACAAAGGAAGCCGCATAATCC  
AGTACTTACCTGCAGACGCCCGGCTCTATGAGCTGAAAGTGCTGGGCGGGCTGCACAAGTATCTGGAG  
AAGTGCGGATGGAGTGTGGCGGGACAGGGCCTGTACAAGTACGGAGATCGAGTAAAGAAGTCAATGGA  
CGCCACCGGCGCCGCTATAGCGGAAGACGTGGCGGGCTGGGACACCAAGATCTCCAAAGGACTGCTCA  
CCCTGGAGTCCCATATGTTTACCAAGCTAGCGGAGGATGAAGAAATGGCGCGGGAGATCCACCACCTC  
TACCGACTCTACGCAGATCCACACATGGTGGTCCAGAGGGAGATTGAAGGTGAGGTCCATGACGTACT  
CCTTAGGGGGAGGGGGCAGGTCTCCTCCGGGAGGCAGCCACCTACGCGGCCAACACCATCACCAACT  
TCATAACGACAACATATGGAATGGCCGTGACCCTTGGTATACCTGAGGCCGACTGGCCCCGACTGATA  
AGGGACCTCACAGATGAGAGGGGAAACAGGCGTCTCCTCGTCTCGGGGGACGACAAGGTCCTTTTCTT  
AAGGGGAGATGAGGCTAGGGTTACGCCTCGTCGGCCTACCGGATAAGTAACGACATGGGACTGGTGA  
GAAAGGACATGGCCCTGGAACAGGAATCTGAGATCATTGTGGACGTGAAAGAAATATCCTTCTGCTCC  
CACAGGTACTGGCCGGTGAAGTACGGCAATGAGATTCACTACATGCCGGTCAGGGACGTGGGGGAGAT



CTTTGCCAAGGCCACCATGGCCTTGGGCGTCTACAAGGACGACATGACCCAGGAGGCGTGGGCTAGAG  
TGCAAGGCCTTAACATGCTGGTGAACCTACCATCACATTCCAGAATGCAGAATGTTGGCTCTGGCCATC  
CTCTCAGTGACACGGATCGGCCTAAACCTGAAAGGGATCACCAAGGGCTGGATGATGAGCACCGAGTG  
GCTTAGAGACGACTTAGCACCAGACACCATCCACGCTCTCATCACCGAAGGGAGAACCTCGGGGTGGG  
ACCAATTAGGCTACGTGGATTTCAAGGATAGGAAGGGTATCCTACTACGACCTGATGCCAGCTACAAG  
AACTGGAGGAGAGACCTCCCTGAAAAAGTGCGACAACCTCAGGGAGGATGGACAATACAAGGACTGGTT  
ACAGAGGATGGCAGTGTGTTGGTTAGAGACCGATCACACCGACACGAAACACACACAAACACACTAGAG  
TAGAGCGCCCTGGAAAAACCAGGTTGCGGTGTTAGCGCCACCGTGCATGAATACGACAAAACCTGAATT  
GGGGGAAAAAGTAAAATCTGCGGTATCTGCAGGCAGCGACTAAGGG

>MT290\_ON186502

TTAAGGAATCCGCCTCAGACTCAAACGCAGACAAAACAACAAGACAGACAATCGTAAGAAATACA  
ATGGACACAGACACCGTGATCGCTGGGTTGGCCATGGTGATGCTTATTCTGCTGGCTACGCTCCTGCA  
GATGGCATCACACTACAGAGAACATGCCACCTTCATCTACACCCCAGGAGGAAAGCTGGAGGAGTATA  
AAGGAGATGGGCTCAAAGTGTGGAGGTTAGAGCCACGTTGGGGGATCCGACCGAACTGGGTAGGCAG  
GCAAAGAAAGAGATGAACGCCATGACCTATGAGGAATTTGACAGAATGAAGTTCAGGGGAGTGGTGGC  
CGAAGTGTACGCAGGAGATAAACCATCAAAGGGCTACGATAAACTTAGGATACTACTAGACATAATGG  
ACAGACCCAAGTTGGGAACGACGTTGACCTTTGCGCGGGCCGAGGGGGCTGGAGCCAGCTAGTTAGA  
GAGCTAGAGGGACCAGGCGAAATCACTGCTGTCTCCCTATGGGAGAGAGGTAGAGAGGAATGGATGGC  
TGACCCCGCTATAAGGAGAATCAATGCCAATGTGAAGAATGTCAAGCCCTGGCGTGTAGACACGTTAC  
TATTGACGGGGGGGAGACCTTCAAAGGGGACCAAACATCATGAAGGAAGAGAGCTACAACGACGCC  
CTACTGGATGTTGTGGACGCATGGATGATGCAGGCCACACCTCCCAAACTTTGTGATAAAAATACA  
GGTTCCCTATACACAAAAGCGATGAGACTCATAGAAAAGTGGCAAGTGAAAACCAAGAAGGGAAGAC  
TGGTTAGGCTGGCGGGAGACAGGCTGTCCAACACTGTGATGTACTTTATATCAGATAGGCTGGAAACG  
CAGATTCGGGGAAGAATAACCAGCTTCCTCAGGGAGCTCCGGGAGCGAAGAGCGGACAGATCTCTGAC  
GTCTGACCCGCGCCCTGCAATACGAACGCATAGCGCCGGAGTGGACAGCAGAGGCTGTGATTGAGGGGT  
GCGCCCCACTCACACCGCTGAACATGACCAGATCTATAGCAGAGATGCATATGGAATACCCACCTTTG  
GGGATAACCAGATTCTTCAAAGAGCTCGGTTACAAGATCGCAAAAAGAAGGGCTCAGAAGGCACGCG  
AAGAAACAGGTTCTGTGGGCCAGCTCATAGAGCCCCTAAGACGAGTGCTAGAACGACACCACCTCTTCG  
GAGCATGGCAACTCACTTCGACAACACCTCGAGCCGTGTTCAATATCTTCAGAAGTAAAGTGGACAGG  
GCTCCGGTGGAGCTCCACTCGCACTATCCGGGACTAAGAAAGATGTACGACATTCTCGCTGACCTCTG  
GCTGGAAGGTACGGAAGCATGAAGCGACTAACCGAAGATGAGATGGCCTCAGCGATAAACAGGAGAG  
GTGCCATGGGTTACCAGATGGACAACAGGAACTACGGAGACCTCGGGGCTACTGGGACTCGGGGGAC  
TGGAGACAAGACGTCAACACGTTCAGGAGGGCTCTGCTCAGTGGAACACCGACTCACGCTGTTTACAA  
CACCACCGCAAAGAAGGAAAAAACAAAGAATTTGACCAGACAGGTGAACAAAGGAAGCCGCATAATCC  
AGTACTTACCTGCAGACGCCCCGGCTCTATGAGCTGAAAGTGCTGGGCGGGCTGCACAAGTATCTGGAG  
AAGTGCGGATGGAGTGTGGCGGGACAGGGCCTGTACAAGTACGGAGATCGAGTAAAGAAGTCAATGGA  
CGCCACCGGCGCCGCTATAGCGGAAGACGTGGCGGGCTGGGACACCAAGATCTCCAAAGGACTGCTCA  
CCCTGGAGTCCCATATGTTTACCAAGCTAGCGGAGGATGAAGAAATGGCGCGGGAGATCCACCACCTC  
TACCGACTCTACGCAGATCCACACATGGTGGTCCAGAGGGAGATTGAAGGTGAGGTCCATGACGTACT  
CCTTAGGGGGAGGGGGCAGGTCTCCTCCGGGAGGCAGCCACCTACGCGGCCAACACCATCACCAACT  
TCATAACGACAACATATGGAATGGCCGTGACCTTGGTATACCTGAGGCCGACTGGCCCCGACTGATA  
AGGGACCTCACAGATGAGAGGGGAAACAGGCGTCTCCTCGTCTCGGGGGACGACAAGGTCCTTTTCTT  
AAGGGGAGATGAGGCTAGGGTTACGCCTCGTCGGCCTACCGGATAAGTAACGACATGGGACTGGTGA  
GAAAGGACATGGCCCTGGAACAGGAATCTGAGATCATTGTGGACGTGAAAGAAATATCCTTCTGCTCC  
CACAGGTACTGGCCGGTGAAGTACGGCAATGAGATTCACTACATGCCGGTCAGGGACGTGGGGGAGAT  
CTTTGCCAAGGCCACCATGGCCTTGGGCGTCTACAAGGACGACATGACCCAGGAGGCGTGGGCTAGAG  
TGCAAGGCCTTAACATGCTGGTGAACCTACCATCACATTCCAGAATGCAGAATGTTGGCTCTGGCCATC

CTCTCAGTGACACGGATCGGCCTAAACCTGAAAGGGATCACCAAGGGCTGGATGATGAGCACCGAGTG  
GCTTAGAGACGACTTAGACACCAGACACCATCCACGCTCTCATCACCGAAGGGAGAACCTCGGGGTGGG  
ACCAATTAGGCTACGTGGATTTCAAGGATAGGAAGGGTATCCTACTACGACCTGATGCCAGCTACAAG  
AACTGGAGGAGAGACCTCCCTGAAAAAGTGCGACAACTCAGGGAGGATGGACAATACAAGGACTGGTT  
ACAGAGGATGGCAGTGTGTTGGTTAGAGACCGATCACACCGACACGAAACACACACAAACACACTAGAG  
TAGAGCGCCCTGAAAAACCAGGTTGCGGTGTTAGCGCCACCGTGCATGAATACGACAAAACCTGAATT  
GGGGGAAAAAGTAAAATCTGCGGTATCTGCAGGCAGCGACTAAGGG

>MT304\_ON186503

TTAAGGAATCCGCCTCAGACTCAAACGCAGACAAAACAACAAGACAGACAATCGTAAGAAATACA  
ATGGACACAGACACCGTGATCGCTGGGTGGCCATGGTGATGCTTATTCTGCTGGCTACGCTCCTGCA  
GATGGCATCACACTACAGAGAACATGCCACCTTCATCTACACCCCAGGAGGAAAGCTGGAGGAGTATA  
AAGGAGATGGGCTCAAAGTGTGGAGTTAGAGCCACGTTGGGGGATCCGACCGAACTGGGTAGGCAG  
GCAAAGAAAGAGATGAACGCCATGACCTATGAGGAATTTGACAGAATGAAGTTCAGGGGAGTGGTGGC  
CGAAGTGTACGCAGGAGATAAACCATCAAAGGGCTACGATAAACTTAGGATACTACTAGACATAATGG  
ACAGACCCAAGTTGGGAACGACGTTGACCTTTGCGCGGGCCGAGGGGGCTGGAGCCAGCTAGTTAGA  
GAGCTAGAGGGACAGGCGAAATCACTGCTGTCTCCCTATGGGAGAGAGGTAGAGAGGAATGGATGGC  
TGACCCCGCTATAAGGAGAATCAATGCCAATGTGAAGAATGTCAAGCCCTGGCGTGTAGACACGTTAC  
TATTCGACGGGGGGGAGACCTTCAAAGGGACCAAACATCATGAAGGAAGAGAGCTACAACGACGCC  
CTACTGGATGTTGTGGACGCATGGATGATGCAGGCCACACCTCCCACAACTTTGTGATAAAAATACA  
GGTTCCTTATACAAAAAGCGATGAGACTCATAGAAAAGTGGCAAGTGAAAACCAAGAAGGGAAGAC  
TGGTTAGGCTGGCGGGAGACAGGCTGTCCAACACTGTGATGTACTTTATATCAGATAGGCTGGAAACG  
CAGATTCGGGGAAGAATAACCAGCTTCCTCAGGGAGCTCCGGGAGCGAAGAGCGGACAGATCTCTGAC  
GTCTGACCCGGCCCTGCAATACGAACGCATAGCGCCGGAGTGGACAGCAGAGGCTGTGATTGAGGGGT  
GCGCCCCACTCACACCGCTGAACATGACCAGATCTATAGCAGAGATGCATATGGAATACCCACCTTTG  
GGGATAACCAGATTCTTCAAAGAGCTCGGTTACAAGATCGCAAAAAGAAGGGCTCAGAAGGCACGCG  
AAGAAACAGGTTCTGTGGGCCAGCTCATAGAGCCCCTAAGACGAGTGCTAGAACGACACCACCTCTTCG  
GAGCATGGCAACTCACTTCGACAACACCTCGAGCCGTGTTCAATATCTTCAGAAGTAAAGTGGACAGG  
GCTCCGGTGGAGCTCCACTCGCACTATCCGGGACTAAGAAAGATGTACGACATTCTCGCTGACCTCTG  
GCTGGAAGGTACGGAAGCATGAAGCGACTAACCGAAGATGAGATGGCCTCAGCGATAAACAGGAGAG  
GTGCCATGGGTTACCAGATGGACAACAGGAACTACGGAGACCTCGGGGCCTACTGGGACTCGGGGGAC  
TGGAGACAAGACGTCAACACGTTCAAGAGGGCTCTGCTCAGTGGAACACCGACTCACGCTGTTTACAA  
CACCACCGCAAAGAAGGAAAAACAAGAATTTGACCAGACAGGTGAACAAAGGAAGCCGCATAATCC  
AGTACTTACCTGCAGACGCCCGGCTCTATGAGCTGAAAGTGCTGGGCGGGCTGCACAAGTATCTGGAG  
AAGTGCGGATGGAGTGTGGCGGGACAGGGCCTGTACAAGTACGGAGATCGAGTAAAGAAGTCAATGGA  
CGCCACCGGCGCCGCTATAGCGGAAGACGTGGCGGGCTGGGACACCAAGATCTCCAAAGGACTGCTCA  
CCCTGGAGTCCCATATGTTACCAAGCTAGCGGAGGATGAAGAAATGGCGCGGGAGATCCACCACCTC  
TACCGACTCTACGCAGATCCACACATGGTGGTCCAGAGGGAGATTGAAGGTGAGGTCCATGACGTACT  
CCTTAGGGGGAGGGGGCAGGTCTCCTCCGGGAGGCAGCCCACCTACGCGGCCAACACCATCACCAACT  
TCATAACGACAACATATGGAATGGCCGTGACCCTTGGTATACCTGAGGCCGACTGGCCCCGACTGATA  
AGGGACCTCACAGATGAGAGGGGAAACAGGCGTCTCCTCGTCTCGGGGGACGACAAGGTCCTTTTCTT  
AAGGGGAGATGAGGCTAGGGTTTACGCCTCGTCGGCCTACCGGATAAGTAACGACATGGGACTGGTGA  
GAAAGGACATGGCCCTGGAACAGGAATCTGAGATCATTGTGGACGTGAAAGAAATATCCTTCTGCTCC  
CACAGTACTGGCCGGTGAAGTACGGCAATGAGATTCACTACATGCCGGTCAGGGACGTGGGGGAGAT  
CTTTGCCAAGGCCACCATGGCCTTGGGCGTCTACAAGGACGACATGACCCAGGAGGCGTGGGCTAGAG  
TGCAAGGCCTTAACATGCTGGTGAACATCCATCACATTCCAGAATGCAGAATGTTGGCTCTGGCCATC  
CTCTCAGTGACACGGATCGGCCTAAACCTGAAAGGGATCACCAAGGGCTGGATGATGAGCACCGAGTG  
GCTTAGAGACGACTTAGACACCAGACACCATCCACGCTCTCATCACCGAAGGGAGAACCTCGGGGTGGG

ACCAATTAGGCTACGTGGATTTCAAGGATAGGAAGGGTATCCTACTACGACCTGATGCCAGCTACAAG  
AACTGGAGGAGAGACCTCCCTGAAAAAGTGCGACAACCTCAGGGAGGATGGACAATACAAGGACTGGTT  
ACAGAGGATGGCAGTGTGTTGGTTAGAGACCGATCACACCGACACGAAACACACACAAACACACTAGAG  
TAGAGCGCCCTGGAAAAACCAGGTTGCGGTGTTAGCGCCACCGTGTCATGAATACGACAAAACTGAATT  
GGGGGAAAAAGTAAAATCTGCGGTATCTGCAGGCAGCGACTAAGGG

>MT293\_ON186504

TTAAGGAATCCGCCTCAGACTCAAACGCAGACAAAACAACAACAAGACAGACAATCGTAAGAAATACA  
ATGGACACAGACACCGTGATCGCTGGGTTGGCCATGGTGATGCTTATTCTGCTGGCTATGCTCCTGCA  
GATGGCATCACACTACAGAGAACATGCCACCTTCATCTACACCCCAGGAGGAAAGCTGGAGGAGTATA  
AAGGAGATGGGCTCAAAGTGTGGAGGTTAGAGCCACGTTGGGGGATCCGACCGAACTGGGTAGGCAG  
GCAAAGAAAGAGATGAACGCCATGACCTATGAGGAATTTGACAGAATGAAGTTCAGGGGAGTGGTGGC  
CGAAGTGTACGCAGGAGATAAAACCATCAAAGGGCTACGATAAACTCAGGATACTACTAGACATAATGG  
ACAGACCCAAGTTGGGAACGACGTTGACCTTTGCGCGGGCCGAGGGGGCTGGAGCCAGCTAGTTAGA  
GAGCTAGAGGGACCAGGCGACATCACTGCTGTCTCCCTATGGGAGAGAGGTAGAGAGGAATGGATGGC  
TGACCCCGCTATAAGGAGGATCAATGCCAATGTGAAGAATGTCAAGCCCTGGCGTGTAGACACGTTAC  
TATTCGACGGGGGGGAGACCTTCAAAGGGACCAAACATCATGAAGGAAGAGAGCTACAACGACGCC  
CTACTGGATGTTGTGGACGCATGGATGATGCAGGCCACACCTCCCAAAAATTTGTGATAAAAATACA  
GGTTCCCTATACACAAAAAGCGATGAGACTCATAGAAAAGTGGCAAGTGAAAACCAAGAAGGGAAGAC  
TGGTTAGGCTGGCGGGAGACAGGCTGTCCAACACCGTGATGTACTTTATATCAGATAGGCTGGAAACG  
CAGATTCGGGGAAGAATAACCAGCTTCCTCAGGGAGCTCCGGGAGCGAAGAGCGGACAGATCTCTGAC  
GTCTGACCCGGCCCTGCAATACGAACGCATAGCGCCGGAGTGGACAGCAGAGGCTGTGATTGAGGGGT  
GCGCCCCACTCACACCGCTGAACATGACCAGATCTATAGCAGAGATGCATATGGAACACCCACCTTTG  
GGGATAACCAGATTCTTCAAAGAGCTCGGTTACAAGATCGCAAAAAGAAGGGCTCAGAAGGCACGCG  
AAGAAACAGGTTTCGTGGGCCAGCTCATAGAGCCCCTAAGACGAGTGCTAGAACGACACCACCTCTTCG  
GAGCATGGCAACTCACTTCGACAACACCTCGAGCCGTGTTCAACATCTTCAGAAGTAAAGTGGACAGG  
GCTCCGGTGGAGCTCCACTCGCACTATCCGGGACTAAGAAAGATGTACGACATTCTCGCTGACCTCTG  
GCTGGAGAGGTACGGAAGCATGAAGCGACTAACCGAAGATGAGATGGCCTCAGCGATAAACAGGAGAG  
GTGCCATGGGTTACCAGATGGACAACAGGAACTACGGAGACCTCGGGGCCTACTGGGACTCGGGGGAT  
TGGAGACAAGACGTCAACACGTTTCAAGAGGGCTCTGCTCAGCGGAACACCGACTCACGCTGTTTACAA  
CACCACCGCAAGAAGGAAAAAACAAGAATCTGACCAGACAGGTGAACAAAGGAAGCCGCATAATCC  
AGTACTTACCTGCAGACGCCCCGACTCTATGAGCTGAAAGTGCTGGGCGGGCTGCACAAGTATCTGGAG  
AAGTGCGGATGGAGTGTGGCGGGACAGGGCTGTACAAGTACGGAGACCGGGTAAAGAAGTCAATGGA  
CGCCACCGGCGCCGCTATAGCGGAAGACGTGGCGGGCTGGGACACTAAGATCTCCAAGGACTACTCA  
CCCTGGAGTCCCATATGTTTACCAAGCTGGCGGAGGATGAAGAAATGGCGCGGGAGATCCACCACCTC  
TACCGACTCTACGCAGATCCACACATGGTGGTCCAGAGGGAGATTGAAGGTGAGGTCCATGACGTACT  
CCTTAGGGGGAGGGGGCAGGTCTCCTCCGGGAGGCAGCCACCTACGCGCCAACACCATCACCAACT  
TCATAACGACAACATATGGAATGGCCGTGACCCTTGGTATACCCGAGGCCGACTGGCCCCGACTGATA  
AGGGACCTCACAGATGAGAGGGGAAACAGGCGCCTCCTCGTCTCGGGGGACGACAAGGTCCTTTTCCCT  
AAGAGGAGATGAGGCTAGGGTTTACGCCTCATCGGCCTACCGGATAAGTAACGACATGGGACTGGTGA  
GAAAGGACATGGCCCTGGAACAGGAATCTGAGATCATTGTGGACGTGAAAGAAATATCCTTCTGCTCC  
CACAGGTACTGGCCGGTGAAGTACGGCAATGAGATTACCCACATGCCGGTCAGGGACGTGGGGGAGAT  
CTTTGCCAAGGCCACCATGGCCTTGGGCGTCTACAAGGATGACATGACCAGGAGGCGTGGGCTAGAG  
TGCAAGGCCTTAACATGCTGGTGAACCTACCATCACATTCCAGAATGCAGAATGTTGGCTCTGGCCATC  
CTCTCGGTGACACGGATCGGCCTAAACCTGAAAGGGATCACCAGGGCTGGATGATGAGCACCGAGTG  
GCTTAGAGACGACTTAGACACCAGACACCATCCACGCTCTCATCACCAGAGGAGAACCTCGGGATGGG  
ACCAATTAGGCTACGTGGATTTCAAGGATAGAAAGGGTATCCTACTACGACCTGATGCCAGCTACAAG  
AACTGGAGGAGAGACCTCCCTGAAAAAGTGCGACAACCTCAGGGAAGATGGACAATACAAGGACTGGCT

ACAGAGGATGGCAGTGT TTTGGTTAGAGACTGATCACACCGACACGAAACACACACAAACACACTAGAG  
TAGAGCGCCCTGGAAAAACCAGGTTGCGGTGTTAGCGCCACCGTACATGAATACGACAAAACCTGAATT  
GGGGGAAAAAGTAAAATCTGCGGTATCTGCAGGCAGCGACTAAGGG

>MT299\_ON186505

TTAAGGAATCCGCCTCAGACTCAAACGCAGACAAAACAACAACAAGACAGACAATCGTAAGAAATACA  
ATGGACACAGACACCGTGATCGCTGGGTTGGCCATGGTGATGCTTATTCTGCTGGCTATGCTCCTGCA  
GATGGCATCACACTACAGAGAACATGCCACCTTCATCTACACCCCAGGAGGAAAGCTGGAGGAGTATA  
AAGGAGATGGGCTCAAAGTGTGGAGGTTAGAGCCCACGTTGGGGGATCCGACCGAACTGGGTAGGCAG  
GCAAAGAAAGAGATGAACGCCATGACCTATGAGGAATTTGACAGAATGAAGTTCAGGGGAGTGGTGGC  
CGAAGTGTACGCAGGAGATAAACCATCAAAGGGCTACGATAAACTCAGGATACTACTAGACATAATGG  
ACAGACCCAAGTTGGGAACGACGGTTGACCTTTGCGCGGGCCGAGGGGGCTGGAGCCAGCTAGTTAGA  
GAGCTAGAGGGACCAGGCGACATCACTGCTGTCTCCCTATGGGAGAGAGGTAGAGAGGAATGGATGGC  
TGACCCCGCTATAAGGAGGATCAATGCCAATGTGAAGAATGTCAAGCCCTGGCGTGTAGACACGTTAC  
TATTCGACGGGGGGGAGACCTTCAAAGGGGACAAAACATCATGAAGGAAGAGAGCTACAACGACGCC  
CTACTGGATGTTGTGGACGCATGGATGATGCAGGCCACACCTCCCAAACTTTGTGATAAAAATACA  
GGTTCCTTATACACAAAAGCGATGAGACTCATAGAAAAGTGGCAAGTGAAAACCAAGAAGGGAAGAC  
TGGTTAGGCTGGCGGGAGACAGGCTGTCCAACACCGTGATGTACTTTATATCAGATAGGCTGGAAACG  
CAGATTCGGGGAAGAATAACCAGCTTCCTCAGGGAGCTCCGGGAGCGAAGAGCGGACAGATCTCTGAC  
GTCTGACCCGGCCCTGCAATACGAACGCATAGCGCCGGAGTGGACAGCAGAGGCTGTGATTGAGGGGT  
GCGCCCCACTCACACCGCTGAACATGACCAGATCTATAGCAGAGATGCATATGGAACACCCACCTTTG  
GGGATAACCAGATTCTTCAAAGAGCTCGGTTACAAGATCGCAAAAAGAAGGGCTCAGAAGGCACGCG  
AAGAAACAGGTTCTGTGGGCCAGCTCATAGAGCCCCTAAGACGAGTGCTAGAACGACACCACCTCTTCG  
GAGCATGGCAACTCACTTCGACAACACCTCGAGCCGTGTTCAACATCTTCAGAAGTAAAGTGGACAGG  
GCTCCGGTGGAGCTCCACTCGCACTATCCGGGACTAAGAAAGATGTACGACATTCTCGCTGACCTCTG  
GCTGGAGAGGTACGGAAGCATGAAGCGACTAACCGAAGATGAGATGGCCTCAGCGATAAACAGGAGAG  
GTGCCATGGGTTACCAGATGGACAACAGGAACTACGGAGACCTCGGGGCCTACTGGGACTCGGGGGAT  
TGGAGACAAGACGTCAACACGTTTCAGGAGGGCTCTGCTCAGCGGAACACCGACTCACGCTGTTTACAA  
CACCACCGCAAAGAAGGAAAAAACAAGAATCTGACCAGACAGGTGAACAAAGGAAGCCGCATAATCC  
AGTACTTACCTGCAGACGCCCAGCTCTATGAGCTGAAAGTGCTGGGCGGGCTGCACAAGTATCTGGAG  
AAGTGCGGATGGAGTGTGGCGGGACAGGGCCTGTACAAGTACGGAGACCGGGTAAAGAAAGTCAATGGA  
CGCCACCGGCGCCGCTATAGCGGAAGACGTGGCGGGCTGGGACACTAAGATCTCCAAAGGACTACTCA  
CCCTGGAGTCCCATATGTTTACCAAGCTGGCGGAGGATGAAGAAATGGCGCGGGAGATCCACCACCTC  
TACCGACTCTACGCAGATCCACACATGGTGGTCCAGAGGGAGATTGAAGGTGAGGTCCATGACGTACT  
CCTTAGGGGGAGGGGGCAGGTCTCCTCCGGGAGGCAGCCACCTACGCGGCCAACACCATCACCAACT  
TCATAACGACAACATATGGAATGGCCGTGACCCTTGGTATACCCGAGGCCGACTGGCCCCGACTGATA  
AGGGACCTCACAGATGAGAGGGGAAACAGGCGCCTCCTCGTCTCGGGGGACGACAAGGTCCTTTTCCT  
AAGAGGAGATGAGGCTAGGGTTTACGCCTCATCGGCCTACCGGATAAGTAACGACATGGGACTGGTGA  
GAAAGGACATGGCCCTGGAACAGGAATCTGAGATCATTGTGGACGTGAAAGAAATATCCTTCTGCTCC  
CACAGGTACTGGCCGGTGAAGTACGGCAATGAGATTACCCACATGCCGGTCAGGGACGTGGGGGAGAT  
CTTTGCCAAGGCCACCATGGCCTTGGGCGTCTACAAGGATGACATGACCCAGGAGGCGTGGGCTAGAG  
TGCAAGGCCTTAACATGCTGGTGAACATACCATCACATTCCAGAATGCAGAATGTTGGCTCTGGCCATC  
CTCTCGGTGACACGGATCGGCCTAAACCTGAAAGGGATACCAAGGGCTGGATGATGAGCACCGAGTG  
GCTTAGAGACGACTTAGACACCAGACACCATCCACGCTCTCATACCGAAGGGAGAACCTCGGGATGGG  
ACCAATTAGGCTACGTGGATTTCAAGGATAGAAAGGGTATCCTACTACGACCTGATGCCAGCTACAAG  
AACTGGAGGAGAGACCTCCCTGAAAAAGTGCGACAACCTCAGGGAAGATGGACAATACAAGGACTGGCT  
ACAGAGGATGGCAGTGT TTTGGTTAGAGACTGATCACACCGACACGAAACACACACAAACACACTAGAG

TAGAGCGCCCTGGAAAAACCAGGTTGCGGTGTTAGCGCCACCGTACATGAATACGACAAAACCTGAATT  
GGGGGAAAAAGTAAAATCTGCGGTATCTGCAGGCAGCGACTAAGGG

>MT328\_ON186506

CGTCCTGAAACAAGTTGGGGAAAGGAAAGAATAACAAACAGAAAAGAACAAAAAATAGAGAAAGAAA  
CTGCTAAGACAAAACAAGAATGGCAAATGACACCATTGCCAACACCATCAACAATGCTGCAGAGAAGG  
TTCAGGCAGTGGTCCAGAAGCTTCTGGGCGGTTCATCCTTTAACACTGTTTACTTGCTCGTGCTTGCT  
GCTGCTTGTTCTTTCACAGGAGACGTCTATATCACCATCTTCAGCGCCATCACCGCTGTGGGACCGGC  
TTCTAGGGCGGACGCAGCGCTCGTCCCACTCATCGCCGCAATCATCATTCGCAGACAAAACCGCATTC  
TTTCGCGCGCAGCTCTCGCGCTCGCGGCAGCTTGCTATGTGCGGGCTCATGCCGTCACTGGCAGCTTAG  
TTCATCTGTGGGCTCCACGAGCGAGCCTGGCCCCCTCTGGGACCAGGTTCTCGAGTGAGATTCTGGG  
TGGTCCCTGAGTATGGGGTCCCCCTACGGCAAAGTCGTGACCGGAATAAAGGACATCGGGCCCTGGCCG  
GACCACTCTGAACCCACGGGTGTGCGATTCTGTGAGGATGCGAAATATGCCCTGCACATGAACACGAC  
TTTCTACTGCTCTGACGAGAAGGCTTACGGATGGGACTGCGACGAAAAGACTCAAACTTCCTCTCCA  
CATATGAGTACAGCTTGAATGTTGATAGGAGCAGGGCCATCTGGAAGTACTCCATCTACACTAGACCG  
GTGGGGCTCCAATTGGGAAACTGCACTGTCAATTGACAGAGTGTATGTTGGAACCATGTGGGGCAGTCA  
CAAGGAGTTGTACCCCTGGTTGAGTTCGACGAGGACCCGCTGCCGGATGGCAGCAACAGGTATAGTG  
TTAGGGTGCTTCCCAACGGGAGATGTCAACTTCTGCCAAATCAGCACGCCTCATTGGCCCTCAAGGCC  
TCTGAGGTGCAAGAGCCCAAAGTGAAATATCGAGCACCATTTACGTCTATGACCAGCTAACCCCTCA  
TGGCCCTCCATCGGTGGTTTGACCAGGTGTGGCCCGACCCATATGCCTGCATCAGGGAAGGGCAGT  
GCCAGAGCTACCCCATGAGTAGGGAGCCGTGCAGCGGAGAGAATGACGTCCAAGTGAGGCAGACTCTG  
GGAGTGACTAGGGGAGGCGTGAAGCACAGGCTCACCATCAGAGTCACGGGAAGGAAAGGGCCTTGCGA  
TCCAATCATAACAGCTGACAGTGGCTACCATGAGGTCACTCGGCGCCATGAGGGGAATACCCTCGTGG  
TGGTTTTCGACCTCCCTCTACATCAGACTGTGGTCACAGTGAGGGCTGGAGACACCTGGAAGGAACAT  
CGAATTGCCAAGGATGCTTATCAGACTATTACGAACAGGAAGACGATTTTGGCCACATCCCTCCGCA  
GTGGGTGGCTTGGCTGAAGAACTGGTTTCGGGGGACTTACTTCGGGGTTAGCCCGGGCCTTTGGCCTGA  
TCAGCCGTCTAGTGATTTAGTGGTCAACAACTTGCCAACAGTGCTTGTGGCCGTTGTGCTGGCTACC  
CCATTGGGTTTCGGCCTTGCTCCCTGCTCTCCGGGTATTTGTCATCGTTTTTAACATACAGGTCACCAG  
AGTTAAGGCAGACGGTGGAACATCCGACGAGGACGTCTTGAGCGTACCTTTAGAACTCTTCTTGCACG  
TGGCCATTGCCATGTTCCAGGGACGAGATGTCGCCAACCCTGTTTCGCTTGCTCTGACGGCCCTATCC  
AACCTCATGCCCATGCCATGCCACTTGTCTTCTTCACTCTGACGCATCTCCTCATGATCAACAGAGA  
CTGGACCCTAGCGCTGGCAGGGGCCCTGGCCACCGGGGGGGCTGCCCGGCGTTGCTCTCTACCACA  
TGGCCAACAGTGCGCGCCTTCGCAGGTGGGCCCAGGATCTGGCAAAAAAGGCTGAGGCGGAGGCTGTG  
GAGCAGCTCCCGGAGAGTCACCCATGGTTTGACCCACCCATCCGAGGCCTTTGGCAGGATCTGGTGGG  
GCTGCAGTACCACTCTCAAGGGTACGTAGCATCCACACTGCAGGCGTTTCTCAGCGCCAGCAGGGCCA  
AGAGAGAGAAAAAGTACCGTAGGGTTGCATTCGTGAGAAAGGAGACATCAGGTCCTTCAAAAACCTTT  
TTTCTTTATCCGGGAGAGTATCACAGGCTCATGCCACACCTCCTGGCCATGTCAACCATCGCAGCGTAA  
AGTGTTTCAGAAACAACATACCTACCATCCTCACTCGTAGAGAGGGTGAGTATGGTCCACTACTTCACG  
GCTTAAAAATAGCTGGATACGTGGGAGACCTAGCCGCCGCCAGCTAGGCTCCTTACACAGAGGCGGGA  
ACGGAGTCTGACCCAGGAAAGGTACCGGACACTCGAACACGGAACGAATTTCTCTCTATTTATTTTT  
CCTTGTTCTATTCTTTTTTTTGTTTAATTTCTTTTCCCCTCTTCCCCGCTACCGGCTTGGGGGTTTAA  
GAGGGAGCTTAATCTTATGCTATGACG

>MT308\_ON186507

CGTCCTGAAACAAGTTGGGGAAAGGAAAGAATAACAAACAGAAAAGAACAAAAAATAGAGAAAGAAA  
CTGCTAAGACAAAACAAGAATGGCAAATGACACCATTGCCAATACCATCAACAATGCTGCAGAGAAGG  
TTCAGGCAGTGGTCCAGAAGCTTCTGGGTGGTTTCATCCTTTAACACTGTTTACCTGCTCGTGCTTGCT  
GCTGCTTGTTCTTTCACAGGAGACGTCTATATCACCATCTTCAGCGCCATCACCGCTGTGGGACCGGC

TTCTAGGGCGGACGCGGCGCTCGTCCCCTCATCGCCGCAATCATCATTCGCAGACAAAACCGCATTC  
TTTCGCGCGCAGCTCTCGCGCTCGCGGCAGCTTGCTATGTGGGCTCATGCCGTCACTGGCAGCTTAG  
TTCATCTGTGGGCTCCGCGAGCGAACCTGGCCCCCTCTGGGACCAGGTTCTCGAGTGGAGATTCTGGG  
TGGTCCCTGAGTATGGGGTCCCCCTACGGCAAAGTCGTGACCGGAATAAAGGACATCGGGCCCTGGCCG  
GACCACTCTGAACCCACGGGTGTGCGATTCTGTGAGGATGCAAAATATGCCCTGCACATGAACACGAC  
TTTCTACTGCTCTGACGAGAAGGCTTACGGATGGGACTGCGACGAAAAGACTCAAACTTCCTCTCCA  
CATATGAGTACAGCTTGAATGTTGATAGGAGCAGGGCCATCTGGAAGTACTCCATCTACACTAGACCG  
GTGGGGCTCCAACCTGGGAAACTGCACTGTCATTGACAGAGTGTATGTTGGAACCATGTGGGGCAGCCA  
CAAGGAGTTGTACCCCTGGTTGAGTTCGACGAGGACCCGCTGCCGGATGGCAGCAACAGGTATAGTG  
TTAGGGTGCTTCCCAACGGGAGATGTCAACTTCTGCCAAACCAGCACGCCTCATTGGCCCTCAAGGCC  
TCTGAGGTGCAAGAGCCCAAAGTGAAATATCGAGCACCATTTCATGTCTATGACCAGCTAACCCCTCA  
TGGCCCCCTCCATCGGGTGGTTTGACCAGGTGTGGCCCGACCCATATGCTTGCATTAGGGAAGGGCAGT  
GCCAGAGCTACCCCATGAGTAGGGAGCCGTGCAGCGGAGAGAATGATGTCCAAATGAGGCAGACTCTG  
GGAGTGA CTAGGGGAGGCGTGAAGCACAGGCTTACCATCAGAGTCACGGGAAGGAGAGGGCCTTGCGA  
TCCAATCATAACAGCTGACAGTGGCTACCATGAGGTCAACCGCGCCATGAAGGGAACACCCTCGTGG  
TGATTTGCGACCTCCCTCTACATCAGACTGTGGTCACAGTGAGGGCCGGAGACACCTGGAAGGAACAT  
CGAATTGCCAAGGATGCTTATCAGACTATTACGAACAGGAAGACGATTTTGCCACATCCCTCCGCA  
GTGGGTGGCTTGGCTGAAGAACTGGTTGCGGGGACTCACCTCGGGGCTAGCCCGGGCCTTTGGCCTGA  
TCAGCCGTCTAGCGGATTTAGTGGTCAACAACTTGCCAACAGTGCTTGTGGCCGTGGTGCTGGCTACC  
CCATTGGGTTTCGGCCTTGCTCCCTGCTCTCCGGGTCTTTGTCATCGTCCTAACATACACGGTCACCAG  
AGCCAAGGCAGACGGTGGAACATCCGACGAGGACGTCTTGAGCGTACCTCTAGA ACTCTTCTTGACG  
TGGCCATTGCCATGTTCCAGGGACGAGATGTCGCCAACCCTGTTTCGCTTGCTTTGACGGCCCTATCC  
AACCTCGTGCCCATGCCCATGCCACTTGTCTTCTTCACTCTGACGCATCTCCTCATGATCAACAGAGA  
CTGGACCCTAGCGTTGGCAGGGGCCCTGGCCACCGGGGGGGCTGCCCGCGCTTGCTCTCTACCACA  
TGGTCAACAGTGGCCGCTTCGCAGGTGGGCCCAGGATCTGGCAAAAAGGCTGAGGCGGAGGCTGTG  
GAGCAGCTCCCGGAGAGCCACCCATGGTTTGACCCACCCATCCGAGGCCTTTGGCAAGATCTGGTGGG  
GCTGCAGTACCATTCCCAAGGTACGTAGCATCCACACTGCAGGCGTTCTCAGCGCCAGCAGGGCCA  
AGAGAGAAAAAAATACCGTAGGGTCGCATTCTGTGAGAAAGGAGACATCAGGTCCTTCAAAACTTT  
TTTCTTTATCCGGGAGAGTATCACAGGCTCATGCCACACCTCCTGGCCATGTCACCATCGCAGCGTAA  
AGTGTTCAGAAATAACATACCCACCATCCTCACTCGTAGAGAGGGTGAGTATGGTCCACTACTTCACG  
GCTTAAAAATAGCTGGATATGTGGGAGACCTAGCCGCCGCCAGCTAGGCTCCTTACACAGAGGCGGGA  
ACGGAGTCTGACCTAGGAAAGGTACCGGACACTCGAACACGGAACGAATTCCTCCTCATTTATTTTC  
CCTTGTTCTATTCTTTTTTTGTTTAATTTCTTTTCCCCTCTTCCCCGCCTACCGGCTTGGGGGTTTAA  
AGGGAGCTCAATCTTATGCTATGACG

>MT304\_ON186508

CGTCCTGAAACAAGTTGGGGAAAGGAAAGAATAACAAACAGAAAAGAACAAAAAATAGAGAAAGAAA  
CTGCTAAGACAAAACAAGAATGGCAAATGACACCATTGCCAATACCATCAACAATGCTGCAGAGAAGG  
TTCAGGCAGTGGTCCAGAAGCTTCTGGGTGGTTCATCCTTTAACACTGTTTACCTGCTCGTGCTTGCT  
GCTGCTTGGTTCTTCACAGGAGACGTCTATATCACCATCTTCAGCGCCATCACCGCTGTGGGACCGGC  
TTCTAGGGCGGACGCGGCGCTCGTCCCCTCATCGCCGCAATCATCATTCGCAGACAAAACCGCATTC  
TTTCGCGCGCAGCTCTCGCGCTCGCGGCAGCTTGCTATGTGGGCTCATGCCGTCACTGGCAGCTTAG  
TTCATCTGTGGGCTCCGCGAGCGAACCTGGCCCCCTCTGGGACCAGGTTCTCGAGTGGAGATTCTGGG  
TGGTCCCTGAGTATGGGGTCCCCCTACGGCAAAGTCGTGACCGGAATAAAGGACATCGGGCCCTGGCCG  
GACCACTCTGAACCCACGGGTGTGCGATTCTGTGAGGATGCAAAATATGCCCTGCACATGAACACGAC  
TTTCTACTGCTCTGACGAGAAGGCTTACGGATGGGACTGCGACGAAAAGACTCAAACTTCCTCTCCA  
CATATGAGTACAGCTTGAATGTTGATAGGAGCAGGGCCATCTGGAAGTACTCCATCTACACTAGACCG  
GTGGGGCTCCAACCTGGGAAACTGCACTGTCATTGACAGAGTGTATGTTGGAACCATGTGGGGCAGCCA

CAAGGAGTTGTACCCCCTGGTTGAGTTCGACGAGGACCCGCTGCCGGATGGCAGCAACAGGTATAGTG  
TTAGGGTGCTTCCCAACGGGAGATGTCAACTTCTGCCAAACCAGCACGCCTCATTGGCCCTCAAGGCC  
TCTGAGGTGCAAGAGCCCAAAGTGAAATATCGAGCACCATTTCATGTCTATGACCAGCTAACCCCTCA  
TGGCCCTCCATCGGGTGGTTTGACCAGGTGTGGCCGACCCATATGCTTGCAATTAGGGAAGGGCAGT  
GCCAGAGCTACCCCATGAGTAGGGAGCCGTGCAGCGGAGAGAATGATGTCCAAATGAGGCAGACTCTG  
GGAGTGACTAGGGGAGGCGTGAAGCACAGGCTTACCATCAGAGTCACGGGAAGGAGAGGGCCTTGCGA  
TCCAATCATAACAGCTGACAGTGGCTACCATGAGGTCAACCGGCGCCATGAAGGGAACACCCTCGTGG  
TGATTTGCGACCTCCCTCTACATCAGACTGTGGTCACAGTGAGGGCCGAGACACCTGGAAGGAACAT  
CGAATTGCCAAGGATGCTTATCAGACTATTACGAACAGGAAGACGATTTTGGCCACATCCCTCCGCA  
GTGGGTGGCTTGGCTGAAGAACTGGTTCTGGGGGACTCACCTCGGGGCTAGCCCGGGCCTTTGGCCTGA  
TCAGCCGTCTAGCGGATTTAGTGGTCAACAACTTGCCAACAGTGCTTGTGGCCGTGGTGCTGGCTACC  
CCATTGGGTTTCGGCCTTGTCCCTGCTCTCCGGGTCTTTGTCTATCGTCTAACATAACAGGTACCCAG  
AGCCAAGGCAGACGGTGGAACATCCGACGAGGACGTCTTGAGCGTACCTCTAGAACTCTTCTTGACG  
TGGCCATTGCCATGTTCCAGGGACGAGATGTCGCCAACCCTGTTTCGCTTGCTTTGACGGCCCTATCC  
AACCTCGTGCCCATGCCCATGCCACTTGTCTTCTTCACTCTGACGCATCTCCTCATGATCAACAGAGA  
CTGGACCCTAGCGTTGGCAGGGGCCCTGGCCACCGGGGGGGGCTGCCCGGCGTTGCTCTCTACCACA  
TGGTCAACAGTGCGCCCTTCGCAGGTGGGCCAGGATCTGGCAAAAAGGCTGAGGCGGAGGCTGTG  
GAGCAGCTCCCGGAGAGCCACCCATGGTTTGACCCACCCATCCGAGGCCTTTGGCAAGATCTGGTGGG  
GCTGCAGTACCATTCCCAAGGGTACGTAGCATCCACACTGCAGGCGTTCCTCAGCGCCAGCAGGGCCA  
AGAGAGAAAAAAATACCGTAGGGTCGCATTCGTGAGAAAGGAGACATCAGGTCCTTCAAAAACCTTT  
TTTCTTTATCCGGGAGAGTATCACAGGCTCATGCCACACCTCCTGGCCATGTACCATCGCAGCGTAA  
AGTGTTCAGAAATAACATACCCACCATCCTCACTCGTAGAGAGGGTGAGTATGGTCCACTACTTCACG  
GCTTAAAAATAGCTGGATATGTGGGAGACCTAGCCGCCCGCCAGCTAGGCTCCTTACACAGAGGCGGGA  
ACGGAGTCTGACCTAGGAAAGGTACCGGACACTCGAACACGGAACGAATTTCTCTCTATTTATTTTC  
CCTTGTTCTATTCTTTTTTGTTTAATTTCTTTTCCCCTCTTCCCCGCCTACCGGCTTGGGGGTTTAA  
AGGGAGCTCAATCTTATGCTATGACG

>MT297\_ON186509

CGTCCTGAAACAAGTTGGGGAAAGGAAAGAATAACAAACAGAAAAGAACAAAAAATAGAGAAAGAAA  
CTGCTAAGACAAAACAAGAATGGCAAATGACACCATTGCCAATACCATCAACAATGCTGCAGAGAAGG  
TTCAGGCAGTGGTCCAGAAGCTTCTGGGTGGTTCATCCTTTAACACTGTTTACCTGCTCGTGCTTGCT  
GCTGCTTGGTTCTTCACAGGAGACGTCTATATCACCATCTTCAGCGCCATCACCGCTGTGGGACCGGC  
TTCTAGGGCGGACGCGGCGCTCGTCCCACTCATCGCCGCAATCATCATTGCGAGACAAAACCGCATTC  
TTTCGCGCGCAGCTCTCGCGCTCGCGGCAGCTTGCTATGTCGGGCTCATGCCGTCACTGGCAGCTTAG  
TTCATCTGTGGGCTCCGCGAGCGAACCTGGCCCCCTCTGGGACCAGGTTCTCGAGTGAGATTCTGGG  
TGGTCCCTGAGTATGGGGTCCCCCTACGGCAAAGTCGTGACCGGAATAAAGGACATCGGGGCCCTGGCCG  
GACCACTCTGAACCCACGGGTGTGCGATTCTGTGAGGATGCAAAATATGCCCTGCACATGAACACGAC  
TTTCTACTGCTCTGACGAGAAGGCTTACGGATGGGACTGCGACGAAAAGACTCAAAACTTCCTCTCCA  
CATATGAGTACAGCTTGAATGTTGATAGGAGCAGGGCCATCTGGAAGTACTCCATCTACACTAGACCG  
GTGGGGCTCCAACCTGGGAAACTGCACTGTCAATTGACAGAGTGATGTTGGAACCATGTGGGGCAGCCA  
CAAGGAGTTGTACCCCCTGGTTGAGTTCGACGAGGACCCGCTGCCGGATGGCAGCAACAGGTATAGTG  
TTAGGGTGCTTCCCAACGGGAGATGTCAACTTCTGCCAAACCAGCACGCCTCATTGGCCCTCAAGGCC  
TCTGAGGTGCAAGAGCCCAAAGTGAAATATCGAGCACCATTTCATGTCTATGACCAGCTAACCCCTCA  
TGGCCCTCCATCGGGTGGTTTGACCAGGTGTGGCCGACCCACATGCTTGCAATTAGGGAAGGGCAGT  
GCCAGAGCTACCCCATGAGTAGGGAGCCGTGCAGCGGAGAGAATGATGTCCAAATGAGGCAGACTCTG  
GGAGTGACTAGGGGAGGCGTGAAGCACAGGCTTACCATCAGAGTCACGGGAAGGAGAGGGCCTTGCGA  
TCCAATCATAACAGCTGACAGTGGCTACCATGAGGTCAACCGGCGCCATGAAGGGAACACCCTCGTGG  
TGATTTGCGACCTCCCTCTACATCAGACTGTGGTCACAGTGAGGGCCGAGACACCTGGAAGGAACAT

CGAATTGCCAAGGATGCTTATCAGACTATTACGAACAGGAAGACGATTTTGGCCACATCCCTCCGCA  
GTGGGTGGCTTGGCTGAAGAACTGGTTCGGGGGACTCACCTCGGGGCTAGCCCGGGCCTTTGGCCTGA  
TCAGCCGTCTAGCGGATTTAGTGGTCAACAACCTTGCCAACAGTGCTTGTGGCCGTGGTGCTGGCTACC  
CCATTGGGTTTCGGCCTTGTCCCCTGCTCTCCGGGTCTTTGTTCATCGTCCTAACATAACAGGTCACCAG  
AGCCAAGGCAGACGGTGGAACATCCGACGAGGACGTCTTGAGCGTACCTCTAGAACTCTTCTTGACAG  
TGGCCATTGCCATGTTCCAGGGACGAGATGTCGCCAACCCTGTTTTCGCTTGCTTTGACGGCCCTATCC  
AACCTCGTGCCCATGCCCATGCCACTTGTCTTCTTCACTCTGACGCATCTCCTCATGATCAACAGAGA  
CTGGACCCTAGCGTTGGCAGGGGCCCTGGCCCACCGGGGGGGGCTGCCCCGCGGTTGCTCTCTACCACA  
TGGTCAACAGTGCGCCGCTTCGCAGGTGGGCCCAGGATCTGGCAAAAAAGGCTGAGGCGGAGGCTGTG  
GAGCAGCTCCCGGAGAGCCACCCATGGTTTGACCCACCCATCCGAGGCCTTTGGCAAGATCTGGTGGG  
GCTGCAGTACCATTCCCAAGGGTACGTAGCATCCACACTGCAGGCGTTTCTCAGCGCCAGCAGGGCCA  
AGAGAGAAAAAAATACCGTAGGGTCGCATTCGTGAGAAAGGAGACATCAGGTCCTTCAAAAACCTTT  
TTTCTTTTATCCGGGAGAGTATCACAGGCTCATGCCACACCTCCTGGCCATGTCACCATCGCAGCGTAA  
AGTGTTTCAAGAAATAACATAACCCACCATCCTCACTCGTAGAGAGGGTGAGTATGGTCCGCTACTTCACG  
GCTTAAAAATAGCTGGATATGTGGGAGACCTAGCCGCCGCCAGCTAGGCTCCTTACACAGAGGCGGGA  
ACGGAGTCTGACCTAGGAAAGGTACCGGACACTCGAACACGGAACGAATTTCTCCTCATTTATTTTC  
CCTTGTTCTATTCTTTTTTTGTTTAATTTCTTTTCCCCTCTTCCCCGCCTACCGGCTTGGGGGTTTAAAG  
AGGGAGCTCAATCTTATGCTATGACG

>MT290\_ON186510

CGTCCTGAAACAAGTTGGGGAAAGGAAAGAATAACAAACAGAAAAGAACAAAAAATAGAGAAAGAAA  
CTGCTAAGACAAAACAAGAATGGCAAATGACACCATTGCCAATACCATCAACAATGCTGCAGAGAAGG  
TTCAGGCAGTGGTCCAGAAGCTTCTGGGTGGTTCATCCTTTAACACTGTTTACCTGCTCGTGCTTGCT  
GCTGCTTGGTTCTTCACAGGAGACGTCTATATCACCATCTTCAGCGCCATCACCGCTGTGGGACCGGC  
TTCTAGGGCGGACGCGGCGCTCGTCCCCTCATCGCCGCAATCATCATTCGCAGACAAAACCGCATTC  
TTTCGCGCGCAGCTCTCGCGCTCGCGGCAGCTTGCTATGTCGGGCTCATGCCGTCACTGGCAGCTTAG  
TTCATCTGTGGGCTCCGCGAGCGAACCTGGCCCCCTCTGGGACCAGGTTCTCGAGTGAGATTCTGGG  
TGGTCCCTGAGTATGGGGTCCCCCTACGGCAAAAGTCGTGACCGGAATAAAGGACATCGGGGCCCTGGCCG  
GACCACTCTGAACCCACGGGTGTGCGATTCTGTGAGGATGCAAAATATGCCCTGCACATGAACACGAC  
TTTCTACTGCTCTGACGAGAAGGCTTACGGATGGGACTGCGACGAAAAGACTCAAACTTCTCTCCA  
CATATGAGTACAGCTTGAATGTTGATAGGAGCAGGGCCATCTGGAAGTACTCCATCTACACTAGACCG  
GTGGGGCTCCAACCTGGGAAACTGCACTGTCAATTGACAGAGTGATGTTGGAACCATGTGGGGCAGCCA  
CAAGGAGTTGTACCCCTGGTTGAGTTCGACGAGGACCCGCTGCCGGATGGCAGCAACAGGTATAGTG  
TTAGGGTGCTTCCCAACGGGAGATGTCAACTTCTGCCAAACCAGCACGCCTCATTGGCCCTCAAGGCC  
TCTGAGGTGCAAGAGCCCAAAGTGAAATATCGAGCACCATTTTCATGTCTATGACCAGCTAACCCCTCA  
TGGCCCCCTCCATCGGGTGGTTTGACCAGGTGTGGCCCGACCCATATGCTTGCAATTAGGGAAGGGCAGT  
GCCAGAGCTACCCCATGAGTAGGGAGCCGTGCAGCGGAGAGAATGATGTCAAATGAGGCAGACTCTG  
GGAGTGACTAGGGGAGGCGTGAAGCACAGGCTTACCATCAGAGTCACGGGAAGGAGAGGGCCTTGCGA  
TCCAATCATAACAGCTGACAGTGCGTACCATGAGGTACCCGGCGCCATGAAGGGAACACCCTCGTGG  
TGATTTGCGACCTCCCTCTACATCAGACTGTGGTCACAGTGAGGGCCGGAGACACCTGGAAGGAACAT  
CGAATTGCCAAGGATGCTTATCAGACTATTACGAACAGGAAGACGATTTTGGCCACATCCCTCCGCA  
GTGGGTGGCTTGGCTGAAGAACTGGTTCGGGGGACTCACCTCGGGGCTAGCCCGGGCCTTTGGCCTGA  
TCAGCCGTCTAGCGGATTTAGTGGTTAACAACCTTGCCAACAGTGCTTGTGGCCGTGGTGCTGGCTACC  
CCATTGGGTTTCGGCCTTGTCCCCTGCTCTCCGGGTCTTTGTTCATCGTCCTAACATAACAGGTCACCAG  
AGCCAAGGCAGACGGTGGAACATCCGACGAGGACGTCTTGAGCGTACCTCTAGAACTCTTCTTGACAG  
TGGCCATTGCCATGTTCCAGGGACGAGATGTCGCCAACCCTGTTTTCGCTTGCTTTGACGGCCCTATCC  
AACCTCGTGCCCATGCCCATGCCACTTGTCTTCTTCACTCTGACGCATCTCCTCATGATCAACAGAGA  
CTGGACCCTAGCGTTGGCAGGGGCCCTGGCCCACCGGGGGGGGCTGCCCCGCGGTTGCTCTCTACCACA



TGGTCAACAGTGGCCGCTTCGCAGGTGGGCCCAGGATCTGGCAAAAAAGGCTGAGGCGGAGGCTGTG  
GAGCAGCTCCCGGAGAGCCACCCATGGTTTGACCCACCCATCCGAGGCCTTTGGCAAGATCTGGTGGG  
GCTGCAGTACCATTCCCAAGGGTACGTAGCATCCACACTGCAGGCGTTCCTCAGCGCCAGCAGGGCCA  
AGAGAGAAAAAATAACCGTAGGGTCGCATTCGTGAGAAAGGAGACATCAGGTCCTTCAAAAACTTT  
TTTCTTTATCCGGGAGAGTATCACAGGCTCATGCCACACCTCCTGGCCATGTACCATCGCAGCGTAA  
AGTGTTTCAGAAATAACATACCCACCATCCTCACTCGTAGAGAGGGTGAGTATGGTCCACTACTTCACG  
GCTTAAAAATAGCTGGATATGTGGGAGACCTAGCCGCCGCCAGCTAGGCTCCTTACACAGAGGCGGGA  
ACGGAGTCTGACCTAGGAAAGGTACCGGACACTCGAACACGGAACGAATTCCTCCTCATTTATTTTC  
CCTTGTTCTATTCTTTTTTGTTTAATTTCTTTTCCCCTCTTCCCCGCCTACCGGCTTGGGGGTTTAA  
AGGGAGCTCAATCTTATGCTATGACG

>MT293\_ON186511

CGTCCTGAAACAAGTTGGGGAAAGGAATAAATAACAAACAGAAAAGAACAAAAAATAGAGAAAGAAA  
CTGCTAAGACAAAACAAGAATGGCAAATGACACCATTGCCAATACCATCAACAATGCTGCAGAGAAGG  
TGCAGGCAGTGGTCCAGAAGCTTCTGGGCGGTTTCATCCTTTAACAAGTGTTCCTACTCGTGCTTGCT  
GCTGCTTGTTCTTCACTGGAGACGTCTACATCATCATCTTCAGCGCCATCACCGCTGTGGGACCGGC  
TTCTAGGGCGGACGCGGCGCTCGTCCCCCTCATCGCCGCAATCATCATTGCAGACAAAACCGCATTC  
TTTCGCGCGCAGCTCTCGCGCTCGCGGCAGCTTGCTACGTGGGCTCATGCCGTCACTGGCAGCTTAG  
TTCATCTGTGGGCTCCGCGAGTGAGCCTGGCCCCCTCTGGGACCAGGCTCTCGAGTGAGGTTCTGGG  
TGGTCCCTGAGTATGGGGTCCCCCTACGGCAAAGTTGTGACCGGAATAAAAGACATCGGGCCCTGGCCG  
GACTACTCTGAACCCACAGGCGTGCGATTCTGTGAGGATGCAAAATATGCCCTACACATGAACACGAC  
TTTCCATTGCTCTGATGAGAAGGCCTATGGATGGGACTGTGACGAAAAGACTCAAACCTTCCTCTCCA  
CATATGAGTACAGCTTGAATGTGGATAGGAGTAGGGCTATCTGGAAGTACTCCATCTACACCAGACCG  
GTAGGGCTCCAACCTGGGAAACTGCACTGTCACCGACAGAGTGATGTTGGAACCATGTGGGGCAGCCA  
CAAGGAATTGTACCCCTGGTTGAGTTTGATGAGGACCCGCTGCCGGATGGCAGTAACAGATACAGTG  
TTAGAGTGCTCCCCAACGGGAGATGCCAACTTCTGCCAAACCAGCATGCCTCGTTGGCTTTTAGGGCC  
TCCGAGGTCCTAGAGCCCAAGGTGAAATATCGAGCACCATTCCATGTCTATGACCAGCTAACCCCTCA  
TGGCCCCCTCTATCGGGTGGTTTCGACCAGGCGTGGCCCGACCCTTATGCTTGTCATCAGGGAAGGGCAGT  
GTCAGAGCTACCCCATGAGCAGGGAGCCGTGTAGCGGAGAGAACGAAGTCAAATGAGGCAAACCTCTG  
GGAGTGACTAGGGGAGGTGTGAAGCATAGGCTCACCATCAGGGTCACGGGAAGGAGAGGGCCTTGCGA  
TCCAATCATAACAGCTGACAGTGGCTACCATGAGGTCACCCGGCGCCATGAGGGGAACACCCTCGTGG  
TGGTTTGTGACCTCCCTTTACATCAGACTGTGGTTCACAGTGAGGGCCGGAGACACCTGGAGGGAACAC  
CGAATCGTTAAGGATGTGTACCAGACTATCCACGAACAGGAAGACGATTTTGGCCATATCCCCCGCA  
ATGGGTGGCCTGGCTGAAGAACTGGTTTGGGGGGCTCACCTCGGGATTGGCCCGGGCATTGGCCCTAA  
TCAGCCGTCTAGTGGATCTAGTGGTCAACAATTTACCAACAGTACTTGTGGCCGTGGTGCTGGCCACC  
CCATTGGGTTTCGGCCTTGCTCCCTGCTCTCAGGGTTTTTCGTTCATCGTCCTAACGTACACAGTTACCAG  
GGCCAAGGCAGATGGGGGAACATCTGACGGGGACGTCTTGAGCGTACCCCTGGAACCTCTTCTTGACG  
TGGCTATTGCTATGTTCCAGGGACGGGACGTGCTAACCCTGTCTCGCTGGCTCTGACGGCCCTATCC  
AACCTCATGCCCATGCCATGCCACTTGTCTTCTTCACTCTGACGCATCTCCTCATAGTCAACAGAGA  
CTGGACCCTAGCGCTGGCAGGGGCCCTGGCCACCGGGGGGGCTGCCCGCGTCGCTCTCTACCACA  
TGGTCAACAGTGGTCGCCTCCGCAGGCTGGGCCAGGATTTGGCAAAAAAGGCTGAGGCGGAGGCTGTG  
GAACAGCTCCCAGAGAGCCACCCGTGGTTTGACCCACCTATTTCGAGGCCTCTGGCAGGACCTGGTGGG  
GCTGCAGTACCCTCTCAAGGGTATGTAGCATCCACACTGCAGGCGTTTCTCAGCGCCAGCAGGGCCA  
AGAGAGAGAAAAAGTACCGCAGGGTCGCATTTGTGAGAAAGGAGACATCAGGTCCTTTAAAAAATTT  
TTTCTTTATCCGGGAGAGTACCACAGACTCATGCCACATCTCCTAGCTATGTCACCATCACAGCGTAA  
AGTGTTTCAGAAACAACATACCTACCATCCTCACTCGTAGAGAGGGTGAGTATGGTCCACTACTTCACG  
GCCTAAAAATAGCTGGATACGTGGGAGACCTGGCCGCCGCCAGCTAGGCTCCTAACACAAAGGCGGGA  
ACGGAACTCGACCCAGGAAAGGCACCAGACACTCGGACGCGGAACGGTCTTCCTCCTCATTTATTTTT

TCTTGTTCTATTCTTTTTTGTTTAACTTCTTTTCCCCTCTTCCCCACCTACTGGCTTGGGGGCTTAAG  
AGGGAGCTTAGTCTTATGCTATGACG

>MT299\_ON186512

CGTCCTGAAACAAAGTTGGGGAAAGGAATAAAATAACAAACAGAAAAGAACAAAAAATAGAGAAAGAAA  
CTGCTAAGACAAAACAAGAATGGCAAATGACACCATTGCCAATACCATCAACAATGCTGCAGAGAAGG  
TGCAGGCAGTGGTCCAGAAGCTTCTGGGCGGTTCATCCTTTAACAAGTGTACCTACTCGTGCTTGCT  
GCTGCTTGGTTCTTCACTGGAGACGTCTACATCATCATCTTCAGCGCCATCACCGCTGTGGGACCGGC  
TTCTAGGGCGGACGCGGCGCTCGTCCCCCTCATCGCCGCAATCATCATTCGCAGACAAAACCGCATTC  
TTTCGCGCGCAGCTCTCGCGCTCGCGGCAGCTTGCTACGTGGGCTCATGCCGTCACTGGCAGCTTAG  
TTCATCTGTGGGCTCCGCGAGTGAGCCTGGCCCCCTCTGGGACCAGGCTCTCGAGTGAGGTTCTGGG  
TGGTCCCTGAGTATGGGGTCCCCCTACGGCAAAGTTGTGACCGGAATAAAAGACATCGGGCCCTGGCCG  
GACTACTCTGAACCCACAGGCGTGCGATTCTGTGAGGATGCAAAATATGCCCTACACATGAACACGAC  
TTTCCATTGCTCTGATGAGAAGGCCTATGGATGGGACTGTGACGAAAAGACTCAAACCTTCCTCTCCA  
CATATGAGTACAGCTTGAATGTGGATAGGAGTAGGGCTATCTGGAAGTACTCCATCTACACCAGACCG  
GTAGGGCTCCAACCTGGGAAACTGCACTGTCAACGACAGAGTGTATGTTGGAACCATGTGGGGCAGCCA  
CAAGGAATTGTACCCCTGGTTGAGTTTGATGAGGACCCGCTGCCGGATGGCAGTAACAGATACAGTG  
TTAGAGTGCTCCCCAACGGGAGATGCCAACTTCTGCCAAACAGCATGCCTCGTTGGCTTTTAGGGCC  
TCCGAGGTCCTAGAGCCCAAGGTGAAATATCGAGCACCATTCATGTCTATGACCAGCTAACCCCTCA  
TGGCCCCCTCTATCGGGTGGTTTCGACCAGGCGTGGCCCGACCCCTATGCTTGTCATCAGGGAAGGGCAGT  
GTCAGAGCTACCCCATGAGCAGGGAGCCGTGTAGCGGAGAGAACGAAGTCCAAATGAGGCAAACCTCTG  
GGAGTGACTAGGGGAGGTGTGAAGCATAGGCTCACCATCAGGGTCACGGGAAGGAGAGGGCCTTGCGA  
TCCAATCATAACAGCTGACAGTGGCTACCATGAGGTCAACCGGCGCCATGAGGGGAACACCCTCGTGG  
TGGTTTGTGACCTCCCTTTACATCAGACTGTGGTCACAGTGAGGGCCGGAGACACCTGGAGGGAACAC  
CGAATCGTTAAGGATGTGTACCAGACTATCCACGAACAGGAAGACGATTTTGGCCATATCCCCCGCA  
ATGGGTGGCCTGGCTGAAGAACTGGTTTGGGGGGGCTCACCTCGGGATTGGCCCGGCATTCGGCCCTAA  
TCAGCCGTCTAGTGATCTAGTGGTCAACAATTTACCAACAGTACTTGTGGCCGTGGTGCTGGCCACC  
CCATTGGGTTTCGGCCTTGCTCCCTGCTCTCAGGGTTTTCGTCATCGTCCTAACGTACACAGTTACCAG  
GGCCAAGGCAGATGGGGGAACATCTGACGGGGACGTCTTGAGCGTACCCCTGGAACCTCTTCTTGACG  
TGGCTATTGCTATGTTCCAGGGACGGGACGTGCTAACCCTGTCTCGCTGGCTCTGACGGCCCTATCC  
AACCTCATGCCCATGCCATGCCACTTGTCTTCTTCACTCTGACGCATCTCCTCATAGTCAACAGAGA  
CTGGACCCTAGCGCTGGCAGGGGCCCTGGCCACCGGGGGGGGCTGCCCGGCGTCTGCTCTTACCACA  
TGGTCAACAGTGGTCGCCTCCGCAGGCTGGGCCAGGATTTGGCAAAAAAGGCTGAGGCGGAGGCTGTG  
GAACAGCTCCCAGAGAGCCACCCGTGGTTTGACCCACCTATTCGAGGCCTCTGGCAGGACCTGGTGGG  
GCTGCAGTACCACTCTCAAGGTATGTAGCATCCACACTGCAGGCGTTTCTCAGCGCCAGCAGGGCCA  
AGAGAGAGAAAAAGTACCGCAGGGTCGCATTTGTGAGAAAGGAGACATCAGGTCCTTTAAAAACTTT  
TTTCTTTATCCGGGAGAGTACCACAGACTCATGCCACATCTCCTAGCTATGTACCATCACAGCGTAA  
AGTGTTTCAGAAACAACATACCTACCATCCTCACTCGTAGAGAGGGTGAGTATGGTCCACTACTTCACG  
GCCTAAAAATAGCTGGATACGTGGGAGACCTGGCCGCCCGCCAGCTAGGCTCCTAACACAAAGGCGGGA  
ACGGAACTCGACCCAGGAAAGGCACCAGACACTCGGACGCGGAACGGTCTTCCTCCTCATTTATTTTT  
TCTTGTTCTATTCTTTTTTGTTTAACTTCTTTTCCCCTCTTCCCCACCTACTGGCTTGGGGGCTTAAG  
AGGGAGCTTAGTCTTATGCTATGACG

>MT328\_ON186513

AAACAGAAAAAACTCACAAGTGATTGTTGAGAACTTGACATGGCTACCCAGTGGTAGCAGCCTTGAG  
CTGCGTATTGGCCGAGTGGACAAGGGACTGGCTCCCAATGTGGGGGCCAAGGGTCTCTTAGCTATGG  
CGGCAGCATCCGCGTTGGCACCGGAATTGGTGCTGGCTGCAGCTTGGCTCTCCATACTGAAAGGAAAC  
TCACCAGGTGGGAAATGAACTACACACAAAGACACTTCATGGAGCTGCTGCCCACCATCGGGTGGCT

ATCTCTGGAATACGCGGCTCCACTGGATATCGTCCTAAACGAAGAAGACACACCACACCAGGAGGACA  
GAAGACTATATGAGAAGGCACTGAACCTCTCCTACATAGGGAGAACCAGAACTATCTGCTGACAGCG  
ATAGTGGTGTGACAATGGCGAGCGTGTCTACAGCCCGTCTGCGGGCGTTCTGGGGGCCGTCTCAT  
TCTGACGGTATCCTTCCTGCCACGAGGAGATTTGGGGGGAAGAACGCTGGATGACAGTGCGCCAGTTG  
GAGAGGCAGAGGGGATCTACCGGGTTTTTGGAGCACATCGGACCATGGGCCTTCATGAAAGGTGTGCT  
ACTGTGACGGGGGGGAGCATCGTGTCTCGCTTCATGTGACAGGGGATAGAGCAGTATGGATAGAGGA  
CCGCAGGTATGAGCCCAGCGTGGTTCAACCTAGCGGCGACTTCATAGCTTGGGGGAGACCGCCGGTCA  
TAAACCTCTAAAGGAGGACGACGAGGTGGTGGCCCTGGCACTACACCCAATCACGGACACGGTGCTG  
CCACTGAGATCGAGAACAGCCAGAATGCAGGGAAATGCTATCTACCGCATCAGCAAAACCTCACCAGG  
AGTGAGCGGGTCACCGCTCTTTGTGGTTGACCTTAATGAGAATGGAGACCGCACCTTCGCACTAGCGG  
GGACAATAGGGAGAAGTATACGTGCAGGACCCTACCATCAATATGAGATCCAATCACATCTGCCGTTG  
CCTACCACACCATATGACACTATACTCAGAGCAGGCATAGTCCTCCAGCTATTTAGCCATCCGGGGGC  
GGGAAAGACCCGTGCAATACCGGAGTACGTGAGGCAGCTTATGACCTGGTCCAACAAGGTCTATGTGCG  
CCGGCCCAACCCGGGTGGTTGCTAGAGAGATGCTGGAGGCGCTGGAGGGCACCCGGTGGGTGTGCGCC  
ATGGTAAAGGGCTTCCAAAACCCACGCCTTGGCTAGAGTGGTCGTTACAACACACCAAACCTTACT  
CCGCTACGCGCTCACCTCCGGGCTCTTGGCCTCGCGAGATGTGTTCATATGTGCTGGATGAGACGCATG  
TCGACTCAGCGCAGACCAAGGTTCTGCGAGCACTGGCACATCAGGCTGTGGGAAAGGACAAAAGCAAG  
GCAGCTTGATAGAGATGACTGCCACCGGGAGAGACTCCACCAGCGGAGAGATAAGAGTGGCGACGGA  
TAGCAACTACCACATCGAAGAGCACGTCTATACCACACCTGTGGCCCAGGCAGTTAAACAGTATGCTG  
ACACATACGGACCGAGGCGAATTGCGGTCTTCGTGCCAGGCCCTGACGGGGAAGAGCGGAGCCTTACAG  
GTAGCTAAACAGGTCAGGCAGCTCACCGACTACGCCACGGTGGTCCTGAGTAGGAAGACGTATGAAAA  
GAACATCAAGCTGATCTTTAGGGGCTACCCTAGAGGGCTGTGCATAGTGACCACCTCCATCAGTGAAT  
GTGGAGCCAACCTATGACCTAGACGCAGTTTTTGGACACATGCCAACAATACCACTACCTTGTACGGCT  
TCAGGAACCAAGGGAATGATAACCCCTCCACCCAAGCCCAGACCTGCCAAAGGAGAGGCAGGGTTGG  
AAGGAGAAAGGAGGGCCAGTACTACCGGCCAGCAAATTATGATCTGTTGCAAGCCCCTCCCCTGGATC  
ACCCCGACTCGGTACGCTGCTGGAGGCCAATGTGCCTTAGGGCACTGGGGCTCCCAGAGGAGCCG  
TGTGGAAGAGTTGTTGAGGAGGCGATGCTAAAAATGCAGCCCTCCAAGGACCAGGTGTATAGGTGGCT  
GACCGAGGGAGACACGGAGACTCTAACAGAGACCATGGCCATGTACAATGTTGAAGGTGGAAGAAGAA  
GCCGTGAGCAGGAGAGAACAGTTCGAAATAGGATGAAAACCTACTTCCATGACGTCAGATGGGAGAGA  
GTGGAAGATCAAGAAGAAACACCACAACCAAGACCAGGAGAATACATCTGGGATGAAGAGGGCCCTGA  
GATGATACAAGGAGCATCGTATGCTAGGGCCCCACCACCTCACAGAATACGAGTGAACGAAGCCACCT  
ACCTCAGGGGCACAGTCATAGAGACCCTGAGAGAGGAGGCGGACAGAGAGCTGAGAGAGACGGTGGCT  
GAGCAGCGGGAAGAATAGGCCGCGCTACGTAGCCACACGGACGCGACTCGGACTGTACACGGAACA  
GAGGACAAGGATTACAAGTTTAAGACAAACACTGGCGCCCTAGCAAAGACTAGGTTGCGGCTAGCGCC  
ACCGCAAACAAAAAATAGAAAAACGAAACACAAAAGTCTGTAGTTAAAGCG

>MT293\_ON186514

AAACAGAAAAAACTCACAAGTGATTGTTGAGAACTTGACATGGCTACCCAGTGGTAGCAGCCTTGAG  
CTGCGTATTGGCCGAGTGGAACAAGGATTGGCTCCCAATGTGGGGGCCAAGGGTCTCTTAGCTATGG  
CGGCAGCATCTGCGTTGGCACCGGAATTGGTGCTGGCTGCGGCTTGGCTCTCCATACTGAAAGGAAAC  
TCACCAGGTGCGGGAATGAACTACACACAAAGACACTTCATGGAGCTGCTGCCCACCATCGGGTGGCT  
ATCTCTGGAATACGCGGCTCCACTGGATATCGTCCTAAACGAAGAAGACACACCACACCAGGAGGACA  
GAAGACTATATGAGAAGGCACTGAACCTCTCCTACATAGGGAGAACCAGAACTATTTGCTGACAGCG  
ATAGTGGTGTGACATTGGCGAGCGTGTCTACAGCCCGTCTGCGGGCGTTCTGGGGGCCGTCTCAT  
TCTGACGGTATCCTTCCTGCCACGAGGAGATTTGGGGGGAAGAACGCTGGATGACAGTGCGCCAGTTG  
GAGAGGCAGAGGGGATCTACCGGGTTTTTGGAGCACATCGGACCATGGGCCTTCATGAAAGGTGTGCT  
ACTGTGACGGGGGGGAGCATCGTGTCTCGCTTCATGTGACAGGGGATAGAGCAGTATGGATAGAGGA  
CCGCAGGTATGAGCCCAGCGTGGTTCAACCTAGCGGCGACTTCATAGCTTGGGGGAGACCACCGGTCA

TAAAACCTCTAAAGGAGGACGACGAGGTGGTGGCCCTGGCACTACACCCAATCACGGACACGGTGCTG  
CCACTGAGATCGAGAACAGCCAGAATGCAGGGGAATGCTATCTACCGCATCAGCAAAACCTCACCAGG  
AGTGAGCGGGTCACCGCTCTTTGTGGTTGACCTTAATGAGAATGGAGACCGCACCTTCGCACTAGCGG  
GGACAATAGGGAGAAGTATACGTGCAGGACCCTACCATCAATATGAGATCCAATCACATCTGCCGTTG  
CCTACCACACCATATGACACTATACTCAGAGCAGGCATAGTCCTCCAGCTATTTAGCCATCCGGGGGC  
GGGAAAGACCCGTGCAATACCGGAGTACGTGAGGCAGCTTATGACCTGGTCCAACAAGGTCTATGTGCG  
CCGGCCCAACCCGGGTGGTTGCTAGAGAGATGCTGGAGGCGCTGGAGGGCACCCGGTGGGTGTGCGCC  
ATGGTAAAGGGGCTTCCAAAACCCACGCCTTGGCCAGAGTGGTCGTTACAACACACCAAACCTTACT  
CCGCTACGCGCTCACCTCCGGGCTCTTGGCCTCGCGAGATGTGTCATATGTGCTGGATGAGACGCATG  
TCGACTCAGCGCAGACCAAGGTTCTGCGAGCACTGGTACATCAGGCTGTGGGAAAGGACAAAAGCAAG  
GCAGCTTGCATAGAGATGACTGCCACCGGGAGAGACTCCACCAGCGGAGAGATAAGAGTGGCGACGGA  
TAGCAACTACCACATCGAAGAGCACGTCTATAACACACCTGTGGCCCAGGCAGTTAAACAGTATGCTG  
ACACATACGGACCGAGGCGAATTGCGGTCTTCGTGCCAGGCCTGACGGGGAAGAGCGGAGCCTTACAG  
GTAGCTAAACAGGTCAGGCAGCTCACCGACTACGCCACGGTGGTCCTGAGTAGGAAGACGTATGAAAA  
GAACATCAAGCTGATCTTTAGGGGCTACCTTAGAGGGCTGTGCATAGTGACCACCTCCATCAGTGAAT  
GTGGAGCCAACTATGACCTAGACGCAGTTTTTTGACACATGCCAACAATACCACTACCTTGTTACGGCT  
TCAGGAACCAAGGGAATGATAACCCCTCCACCCAAGCCCAGACCTGCCAAAGGAGAGGCAGGGTTGG  
AAGGAGAAAGGAGGGCCAGTACTACCGGCCAGCAAATTATGATCTGTTGCAAGCCCCTCCCCTGGATC  
ACCCGACTCGGTACGCTGCTGGAGGCCAACATGTGCCTTAGGGCACTGGGGCTCCCAGAGGAGCCG  
TGTGGAAGAGTTGTTGAGGAGGCGATGCTAAAAATGCAGCCCTCCAAGGACCAGGTGTATAGGTGGCT  
GACCGAGGGAGACACGGAGACTCTAACAGAGACCATGGCCATGTACAATGTTGAAGGTGGAAGAAGAA  
GCCGTGAGCAGGAGAGAACAGTTTCGAAATAGGATGAAAACCTACTTCCATGACGTGAGATGGGAGAGA  
GTGGAAGATCAAGAAGAAACACCACAACCAAGACCAGGAGAGTACATCTGGGATGAAGAGGGCCCTGA  
GATGATACAAGGAGCATCGTATGCTAGGGCCCCACCACCTCACAGAATACGAGTGAACGAAGCCACCT  
ACCTCAGGGGCACAGTCATAGAGACCCTGAGAGAGGAGGCGGACAGAGAGCTGAGAGAGACGGTGGCT  
GAGCAGCGGGAAGAATAGGCCGCGCTCACGTAGCCACACGGACGCGACTCGGACTGTACACGGAACA  
GAGGACAAGGATCACAAGTTTAAGACAAACACTGGCGCCCTAGCAAAGACTAGGTTGCGGCTAGCGCC  
ACCGCAAACAAAAAATAGAAAAAACGAAACACAAAAGTCTGTAGTTAAAGCG

>MT299\_ON186515

AAACAGAAAAAACTCACAAGTGATTGTTGAGAACTTGACATGGCTACCCAGTGGTAGCAGCCTTGAG  
CTGCGTATTGGCCGAGTGGACAAGGGATTGGCTCCCAATGTGGGGGCAAGGCTCTCTTAGCTATGG  
CGGCAGCATCTGCGTTGGCACCGGAATTGGTGCTGGCTGCGGCTTGGCTCTCCATACTGAAAGGAAAC  
TCACCAGGTCGGGAAATGAACTACACACAAAGACACTTCATGGAGCTGCTGCCCACCATCGGGTGGCT  
ATCTCTGGAATACGCGGCTCCACTGGATATCGTCCTAAACGAAGAAGACACACCACACCAGGAGGACA  
GAAGACTATATGAGAAGGCACTGAACCTCTCCTACATAGGGAGAACCAGAACTATTTGCTGACAGCG  
ATAGTGGTGTGACATTGGCGAGCGTGTCTACAGCCCGTCTGCGGGCGTTCTGGGGGCGTCTGTCAT  
TCTGACGGTATCCTTTCCTGCCACGAGGAGATTTGGGGGGAAGAACGCTGGATGACAGTGCGCCAGTTG  
GAGAGGCAGAGGGGATCTACCGGGTTTTTTGAGCACATCGGACCATGGGCCTTCATGAAAGGTGTGCGT  
ACTGTGACGGGGGGGAGCATCGTGCTCCTCGCTTCATGTGACAGGGGATAGAGCAGTATGGATAGAGGA  
CCGCAGGTATGAGCCCAGCGTGGTTCAACCTAGCGGCGACTTCATAGCTTGGGGGAGACCACCGGTCA  
TAAAACCTCTAAAGGAGGACGACGAGGTGGTGGCCCTGGCACTACACCCAATCACGGACACGGTGCTG  
CCACTGAGATCGAGAACAGCCAGAATGCAGGGGAATGCTATCTACCGCATCAGCAAAACCTCACCAGG  
AGTGAGCGGGTCACCGCTCTTTGTGGTTGACCTTAATGAGAATGGAGACCGCACCTTCGCACTAGCGG  
GGACAATAGGGAGAAGTATACGTGCAGGACCCTACCATCAATATGAGATCCAATCACATCTGCCGTTG  
CCTACCACACCATATGACACTATACTCAGAGCAGGCATAGTCCTCCAGCTATTTAGCCATCCGGGGGC  
GGGAAAGACCCGTGCAATACCGGAGTACGTGAGGCAGCTTATGACCTGGTCCAACAAGGTCTATGTGCG  
CCGGCCCAACCCGGGTGGTTGCTAGAGAGATGCTGGAGGCGCTGGAGGGCACCCGGTGGGTGTGCGCC

ATGGTAAAGGGGCTTCCAAAACCCACGCCTTGGCCAGAGTGGTCGTTACAACACACCAAACCTTACT  
CCGCTACGCGCTCACCTCCGGGCTCTTGGCCTCGCGAGATGTGTTCATATGTGCTGGATGAGACGCATG  
TCGACTCAGCGCAGACCAAGGTTCTGCGAGCACTGGTACATCAGGCTGTGGGAAAGGACAAAAGCAAG  
GCAGCTTGCATAGAGATGACTGCCACCGGGAGAGACTCCACCAGCGGAGAGATAAGAGTGGCGACGGA  
TAGCAACTACCACATCGAAGAGCACGTCTATACCACACCTGTGGCCCAGGCAGTTAAACAGTATGCTG  
ACACATACGGACCGAGGCGAATTGCGGTCTTCGTGCCAGGCCTGACGGGGAAGAGCGGAGCCTTACAG  
GTAGCTAAACAGGTCAGGCAGCTCACCGACTACGCCACGGTGGTCCTGAGTAGGAAGACGTATGAAAA  
GAACATCAAGCTGATCTTTAGGGGCTACCCTAGAGGGCTGTGCATAGTGACCACCTCCATCAGTGAAT  
GTGGAGCCAACTATGACCTAGACGCAGTTTTTGACACATGCCAACAAATACCACTACCTTGTTACGGCT  
TCAGGAACCAAGGGAATGATAACCCCTCCACCCAAGCCCAGACCTGCCAAAGGAGAGGCAGGGTTGG  
AAGGAGAAAGGAGGGCCAGTACTACCGGCCAGCAAATTATGATCTGTTGCAAGCCCCCTCCCCTGGATC  
ACCCGACTCGGTACGCTGCTGGAGGCCAACATGTGCCTTAGGGCACTGGGGCTCCCAGAGGAGCCG  
TGTGGAAGAGTTGTTGAGGAGGCGATGCTAAAAATGCAGCCCTCCAAGGACCAGGTGTATAGGTGGCT  
GACCGAGGGAGACACGGAGACTCTAACAGAGACCATGGCCATGTACAATGTTGAAGGTGGAAGAAGAA  
GCCGTGAGCAGGAGAGAACAGTTCGAAATAGGATGAAAACCTACTTCCATGACGTCAGATGGGAGAGA  
GTGGAAGATCAAGAAGAAACACCACAACCAAGACCAGGAGAGTACATCTGGGATGAAGAGGGCCCTGA  
GATGATACAAGGAGCATCGTATGCTAGGGCCCCACCACCTCACAGAATACGAGTGAACGAAGCCACCT  
ACCTCAGGGGCACAGTCATAGAGACCCTGAGAGAGGAGGCGGACAGAGAGCTGAGAGAGACGGTGGCT  
GAGCAGCGGGAAGAATAGGCCGCGCTCACGTAGCCACACGGACGCGACTCGGACTGTCACACGGAACA  
GAGGACAAGGATCACAAGTTTAAGACAAACACTGGCGCCCTAGCAAAGACTAGGTTGCGGCTAGCGCC  
ACCGCAAACAAAAAATAGAAAAAACGAAACACAAAAGTCTGTAGTTAAAGCG

>MT308\_ON186516

AAACAGAAAAAACTCACAAGTGATTGTTGAGAACTTGACATGGCTACCCAGTGGTAGCAGCCTTGAG  
CTGCGTATTGGCCGAGTGGACAAGGGATTGGCTCCCAATGTGGGGGCCAAGGGTCTCTTAGCTATGG  
CGGCAGCATCTGCGTTGGCACCGGAATTGGTGCTGGCTGCAGCTTGGCTCTCCATACTGAAAGGAAAC  
TCACCAGGTCGGGAAATGAACTACACACAAAGACACTTCATGGAGCTGCTGCCCACCATCGGATGGCT  
ATCTCTGGAATACGCGGCTCCACTGGATATCGTCCTAAACGAAGAAGACACACCACACCAGGAGGACA  
GAAGACTATATGAGAAGGCACTGAGCCTCTCCTACATAGGGAGAACCAGAACTATTTGCTGACAGCG  
ATAGTGGTGTGACATTGGCGAGCGTGTTCTACAGCCCGTCTGCGGGCGTTCTGGGGGCCGTTGTTCAT  
TCTGACGGTATCCTTTCCTGCCACGAGGAGATCTGGGGGGAAGAACGCTGGATGACAGTGCGCCAGTTG  
GAGAGGCAGAGGGGATCTACCGGGTTTTTGAGCACATCGGACCATGGGCCTTCATGAAAGGTGTGCT  
ACTGTGACGGGGGGGAGCATCGTGTCCTCGCTTCATGTGACAGGGGATAGAGCAGTATGGATAGAGGA  
CCGCAGGTATGAGCCCAGCGTGGTTCAGCCTAGCGGCGACTTCATAGCTTGGGGGAGACCACCGGTCA  
TAAAACCTCTAAAGGAGGACGACGAGGTGGTGGCCCTGGCACTACACCCAATCACGGACACGGTGTCTG  
CCACTGAGATCGAGAACAGCCAGAATGCAGGGAAATGCTATCTACCGCATCAGCAAAACCTCACCAGG  
AGTGAGCGGGTCACCGCTCTTTGTGGTTGACCTTAATGAGAATGGAGACCGCACCTTCGCACTAGCGG  
GGACAATAGGGAGAAGTATACGTGCAGGACCCTACCATCAATATGAGATCCAATCACATTTGCCGTTG  
CCTACCACACCATATGACACTATACTCAGAGCAGGCATAGTCCTCCAGCTATTTAGCCATCCGGGGGC  
GGGAAAGACCCGTGCAATACCGGAGTACGTACGGCAGCTTATGACCTGGTCCAACAAGGTCTATGTCTG  
CCGGCCCAACCCGGGTGGTTGCTAGAGAGATGCTGGAGGCGCTGGAGGGCACCCGGTGGGTGTGCGCC  
ATGGTAAAGGGGCTTCCAAAACCCACGCCTTGGCCAGAGTGGTTGTTACAACACACCAAACCTTACT  
CCGCTACGCGCTCACCTCCGGGCTCTTGGCCTCGCGAGATGTGTTCATATGTGCTGGATGAGACGCATG  
TCGACTCAGCGCAGACCAAGGTTCTGCGAGCACTGGTACATCAGGCTGTGGGAAAGGACAAAAGCAAG  
GCAGCTTGCATAGAGATGACTGCCACCGGGAGAGACTCCACCAGCGGAGAGATAAGAGTGGCGACGGA  
TAGCAACTACCACATCGAAGAGCACGTCTATACCACACCTGTGGCCCAGGCAGTTAAACAGTATGCTG  
ACACATACGGACCGAGGCGAATTGCGGTCTTCGTGCCAGGCCTGACGGGGAAGAGCGGAGCCTTACAG  
GTAGCTAAACAGGTCAGGCAGCTCACCGACTACGCCACGGTGGTCCTGAGTAGGAAGACGTATGAAAA

GAACATCAAGCTGATCTTTAGGGGCTACCCTAGAGGGCTGTGCATAGTGACCACCTCCATCAGTGAAT  
GTGGAGCCAACTATGACCTAGACGCAGTTTTTGTACACATGCCAACAATACCACTACCTTGTTACGGCT  
TCAGGAACTAAGGGAATGATAACCCCTCCACCCAAGCCCAGACCTGCCAAAGGAGAGGCAGGGTTGG  
AAGGAGAAAGGAGGGCCAGTACTACCGGCCAGCAAATTATGATCTGCTGCAAGCCCCTCCCCTGGATC  
ACCCCGACTCGGTCACTCTGCTGGAGGCCAACATGTGCCTTAGGGCACTGGGGCTCCCGGAGGAGCCG  
TGTGGAAGAGTTGTTGAGGAGGCGATGCTAAAAATGCAGCCCTCCAAGGATCAGGTGTATAGGTGGCT  
GACCGAGGGAGACACGGGAGACTCTAACAGAGACCATGGCCATGTACAACGTTGAAGGTGGAAGAAGAA  
GCCGTGAGCAGGAGAGAACAGTTCGAAATAGGATGAAAACCTACTTCCATGACGTCAGATGGGAGAGA  
GTGGAAGATCAAGAAGAAACACCACAACCAAGACCAGGAGAATACATCTGGGATGAAGAGGGCCCTGA  
GATGATACAAGGAGCATCGTATGCTAGGGCCCCACCACCTCACAGAATACGAGTGAACGAAGCCACCT  
ACCTCAGGGGCACAGTCATAGAGACCCTGAGAGAGGAGGCGGACAGAGAGCTGAGAGAGACGGTGGCT  
GAGCAGCGGGAAGAATAGGCCGCGCTCACGTAGCCACACGGACGCGACTCGGACTGTCACACGGAACA  
GAGGACAAGGATCACAAGTTCAAGACAAACACTGGCGCCCTAGCAAAGACTAGGTTGCGGCTCGCGCC  
ACCGCAAACAAAAAATAGAAAAACGAAACACAAAAGTCTGTAGTTAAAGCG

>MT290\_ON186517

AAACAGAAAAAACTCACAAGTGATTGTTGAGAACTTGACATGGCTACCCAGTGGTAGCAGCCTTGAG  
CTGCGTATTGGCCGCAGTGGACAAGGGATTGGCTCCCAATGTGGGGGCCAAGGGTCTCTTAGCTATGG  
CGGCAGCATCTGCGTTGGCACCGGAATTGGTGCTGGCTGCAGCTTGGCTCTCCATACTGAAAGGAAAC  
TCACCAGGTCCGGAAATGAACTACACACAAAGACACTTCATGGAGCTGCTGCCACCATCGGATGGCT  
ATCTCTGGAATACGCGGCTCCACTGGATATCGTCCTAAACGAAGAAGACACACCACACCAGGAGGACA  
GAAGACTATATGAGAAGGCACTGAGCCTCTCCTACATAGGGAGAACCAGAACTATTTGCTGACAGCG  
ATAGTGGTGTGACATTGGCGAGCGTGTCTACAGCCCGTCTGCGGGCGTTCTGGGGGCCGTTGTTCAT  
TCTGACGGTATCCTTCCTGCCACGAGGAGATCTGGGGGGAAGAACGCTGGATGACAGTGCGCCAGTTG  
GAGAGGCAGAGGGGATCTACCGGGTTTTTGTAGCACATCGGACCATGGGCCTTCATGAAAGGTGTGCT  
ACTGTGACGGGGGGGAGCATCGTGTCTCGCTTCATGTGACAGGGGATAGAGCAGTATGGATAGAGGA  
CCGCAGGTATGAGCCCAGCGTGGTTCAGCCTAGCGGCGACTTCATAGCTTGGGGGAGACCACCGGTCA  
TAAAACCTCTAAAGGAGGACGACGAGGTGGTGGCCCTGGCACTACACCCAATCACGGACACGGTGCTG  
CCACTGAGATCGAGAACAGCCAGAATGCAGGGAAATGCTATCTACCGCATCAGCAAAACCTCACCAGG  
AGTGAGCGGGTCACCGCTCTTTGTGGTTGACCTTAATGAGAATGGAGACCGCACCTTCGCACTAGCGG  
GGACAATAGGGAGAAGTATACGTGCAGGACCCTACCATCAATATGAGATCCAATCACATTTGCCGTTG  
CCTACCACACCATATGACACTATACTCAGAGCAGGCATAGTCCTCCAGCTATTTAGCCATCCGGGGGC  
GGGAAAGACCCGTGCAATACCGGAGTACGTGAGGAGCTTATGACCTGGTCCAACAAGGTCTATGTGCG  
CCGGCCCAACCCGGGTGGTTGCTAGAGAGATGCTGGAGGCGCTGGAGGGCACCCGGTGGGTGTGCGCC  
ATGGTAAAGGGGCTTCCAAAACCCACGCCTTGGCCAGAGTGGTTGTTACAACACACCAAACCTTACT  
CCGCTACGCGCTCACCTCCGGGCTCTTGGCCTCGCGAGATGTGTTCATATGTGCTGGATGAGACGCATG  
TCGACTCAGCGCAGACCAAGGTTCTGCGAGCACTGGTACATCAGGCTGTGGGAAAGGACAAAAGCAAG  
GCAGCTTGATAGAGATGACTGCCACCGGGAGAGACTCCACCAGCGGAGAGATAAGAGTGGCGACGGA  
TAGCAACTACCACATCGAAGAGCACGTCTATACCACACCTGTGGCCCAGGCAGTTAAACAGTATGCTG  
ACACATACGGACCGAGGCGAATTGCGGTCTTCGTGCCAGGCCTGACGGGGAAGAGCGGAGCCTTACAG  
GTAGCTAAACAGGTCAGGCAGCTCACCGACTACGCCACGGTGGTCTGAGTAGGAAGACGTATGAAAA  
GAACATCAAGCTGATCTTTAGGGGCTACCCTAGAGGGCTGTGCATAGTGACCACCTCCATCAGTGAAT  
GTGGAGCCAACTATGACCTAGACGCAGTTTTTGTACACATGCCAACAATACCACTACCTTGTTACGGCT  
TCAGGAACTAAGGGAATGATAACCCCTCCACCCAAGCCCAGACCTGCCAAAGGAGAGGCAGGGTTGG  
AAGGAGAAAGGAGGGCCAGTACTACCGGCCAGCAAATTATGATCTGCTGCAAGCCCCTCCCCTGGATC  
ACCCCGACTCGGTCACTCTGCTGGAGGCCAACATGTGCCTTAGGGCACTGGGGCTCCCGGAGGAGCCG  
TGTGGAAGAGTTGTTGAGGAGGCGATGCTAAAAATGCAGCCCTCCAAGGATCAGGTGTATAGGTGGCT  
GACCGAGGGAGACACGGGAGACTCTAACAGAGACCATGGCCATGTACAACGTTGAAGGTGGAAGAAGAA

GCCGTGAGCAGGAGAGAACAGTTCGAAATAGGATGAAAACCTACTTCCATGACGTCAGATGGGAGAGA  
GTGGAAGATCAAGAAGAAACACCACAACCAAGACCAGGAGAATACATCTGGGATGAAGAGGGCCCTGA  
GATGATACAAGGAGCATCGTATGCTAGGGCCCCACCACCTCACAGAATACGAGTGAACGAAGCCACCT  
ACCTCAGGGGCACAGTCATAGAGACCCTGAGAGAGGAGGCGGACAGAGAGCTGAGAGAGACGGTGGCT  
GAGCAGCGGGAAGAATAGGCCGCGCTCACGTAGCCACACGGACGCGACTCGGACTGTCACACGGAACA  
GAGGACAAGGATCACAAGTTCAAGACAAACACTGGCGCCCTAGCAAAGACTAGGTTGCGGCTCGCGCC  
ACCGCAAACAAAAAATAGAAAAAACGAAACACAAAAGTCTGTAGTTAAAGCG

>MT304\_ON186518

AAACAGAAAAAACTCACAAAGTGATTGTTGAGAACTTGACATGGCTACCCAGTGGTAGCAGCCTTGAG  
CTGCGTATTGGCCGAGTGGACAAGGGATTGGCTCCCAATGTGGGGGCCAAGGTCTCTTAGCTATGG  
CGGCAGCATCTGCGTTGGCACCGGAATTGGTGCTGGCTGCAGCTTGGCTCTCCATACTGAAAGGAAAC  
TCACCAGGTCGGGAAATGAACTACACACAAAGACACTTCATGGAGCTGCTGCCACCATCGGATGGCT  
ATCTCTGGAATACGCGGCTCCACTGGATATCGTCTTAAACGAAGAAGACACACCACACCAGGAGGACA  
GAAGACTATATGAGAAGGCACTGAGCCTCTCTACATAGGGAGAACCAGAACTATTTGCTGACAGCG  
ATAGTGGTGTGACATTGGCGAGCGTGTCTTACAGCCCGTCTGCGGGCGTTCTGGGGGCGTTGTTCAT  
TCTGACGGTATCCTTCTGCCACGAGGAGATCTGGGGGGAAGAACGCTGGATGACAGTGCGCCAGTTG  
GAGAGGCAGAGGGGATCTACCGGGTTTTTGAGCACATCGGACCATGGGCCTTCATGAAAGGTGTGCT  
ACTGTGACGGGGGGGAGCATCGTGTCTCGCTTCATGTGACAGGGGATAGAGCAGTATGGATAGAGGA  
CCGCAGGTATGAGCCAGCGTGGTTCAGCCTAGCGGCGACTTCATAGCTTGGGGGAGACCACCGGTCA  
TAAAACCTCTAAAGGAGGACGACGAGGTGGTGGCCCTGGCACTACACCCAATCACGGACACGGTGCTG  
CCACTGAGATCGAGAACAGCCAGAATGCAGGGAAATGCTATCTACCGCATCAGCAAAACCTCACCAGG  
AGTGAGCGGGTCACCGCTCTTTGTGGTTGACCTTAATGAGAATGGAGACCGCACCTTCGCACTAGCGG  
GGACAATAGGGAGAAGTATACGTGCAGGACCCTACCATCAATATGAGATCCAATCACATTTGCCGTTG  
CCTACCACACCATATGACACTATACTCAGAGCAGGCATAGTCTCCAGCTATTTAGCCATCCGGGGGC  
GGGAAAGACCCGTGCAATACCGGAGTACGTCAGGCAGCTTATGACCTGGTCCAACAAGGTCTATGTGCG  
CCGGCCCAACCCGGGTGGTTGCTAGAGAGATGCTGGAGGCGCTGGAGGGCACCCGGTGGGTGTGCGCC  
ATGGTAAAGGGCTTCCAAAACCCACGCCTTGGCCAGAGTGGTTGTTACAACACACCAAACCTTACT  
CCGCTACGCGCTCACCTCCGGGCTCTTGGCCTCGCGAGATGTGTTCATATGTGCTGGATGAGACGCATG  
TCGACTCAGCGCAGACCAAGGTTCTGCGAGCACTGGTACATCAGGCTGTGGGAAAGGACAAAAGCAAG  
GCAGCTTGATAGAGATGACTGCCACCGGGAGAGACTCCACCAGCGGAGAGATAAGAGTGGCGACGGA  
TAGCAACTACCACATCGAAGAGCACGTCTATACCACACCTGTGGCCAGGCAGTTAAACAGTATGCTG  
ACACATACGGACCGAGGCGAATTGCGGTCTTCGTGCCAGGCCTGACGGGGAAGAGCGGAGCCTTACAG  
GTAGCTAAACAGGTCAGGCAGCTCACCGACTACGCCACGGTGGTCTGAGTAGGAAGACGTATGAAAA  
GAACATCAAGCTGATCTTTAGGGGCTACCCTAGAGGGCTGTGCATAGTGACCACCTCCATCAGTGAAT  
GTGGAGCCAATATGACCTAGACGCAGTTTTTGACACATGCCAACAATACCACTACCTTGTACGGCT  
TCAGGAACTAAGGGAATGATAACCCCCCTCCACCCAAGCCCAGACCTGCCAAAGGAGAGGCAGGGTTGG  
AAGGAGAAAGGAGGGCCAGTACTACCGGCCAGCAAATTATGATCTGCTGCAAGCCCCTCCCCTGGATC  
ACCCGACTCGGTCACTCTGCTGGAGGCCAACATGTGCCTTAGGGCACTGGGGCTCCCGGAGGAGCCG  
TGTGGAAGAGTTGTTGAGGAGGCGATGCTAAAAATGCAGCCCTCCAAGGATCAGGTGTATAGGTGGCT  
GACCGAGGGAGACACGGAGACTCTAACAGAGACCATGGCCATGTACAACGTTGAAGGTGGAAGAAGAA  
GCCGTGAGCAGGAGAGAACAGTTCGAAATAGGATGAAAACCTACTTCCATGACGTCAGATGGGAGAGA  
GTGGAAGATCAAGAAGAAACACCACAACCAAGACCAGGAGAATACATCTGGGATGAAGAGGGCCCTGA  
GATGATACAAGGAGCATCGTATGCTAGGGCCCCACCACCTCACAGAATACGAGTGAACGAAGCCACCT  
ACCTCAGGGGCACAGTCATAGAGACCCTGAGAGAGGAGGCGGACAGAGAGCTGAGAGAGACGGTGGCT  
GAGCAGCGGGAAGAATAGGCCGCGCTCACGTAGCCACACGGACGCGACTCGGACTGTCACACGGAACA  
GAGGACAAGGATCACAAGTTCAAGACAAACACTGGCGCCCTAGCAAAGACTAGGTTGCGGCTCGCGCC  
ACCGCAAACAAAAAATAGAAAAAACGAAACACAAAAGTCTGTAGTTAAAGCG

>MT297\_ON186519

AAACAGAAAAAACTCACAAGTGATTGTTGAGAACTTGACATGGCTACCCAGTGGTAGCAGCCTTGAG  
CTGCGTATTGGCCGCAGTGGACAAGGGATTGGCTCCCAATGTGGGGGCCAAGGGTCTCTTAGCTATGG  
CGGCAGCATCTGCGTTGGCACCGGAATTGGTGCTGGCTGCAGCTTGGCTCTCCATACTGAAAGGAAAC  
TCACCAGGTCGGGAAATGAACTACACACAAAGACACTTCATGGAGCTGCTGCCCACCATCGGATGGCT  
ATCTCTGGAATACGCGGCTCCACTGGATATCGTCCTAAACGAAGAAGACACACCACACCAGGAGGACA  
GAAGACTATATGAGAAGGCACTGAGCCTCTCCTACATAGGGAGAACCAGAACTATTTGCTGACAGCG  
ATAGTGGTGTGACATTGGCGAGCGTGTTCTACAGCCCGTCTGCGGGCGTTCTGGGGGCCGTTGTCAT  
TCTGACGGTATCCTTTCCTGCCACGAGGAGATCTGGGGGGAAGAACGCTGGATGACAGTGCGCCAGTTG  
GAGAGGCAGAGGGGATCTACCGGGTTTTTGAGCACATCGGACCATGGGCCTTCATGAAAGGTGTGCT  
ACTGTGACGGGGGGGAGCATCGTGTCTCGCTTCATGTGACAGGGGATAGAGCAGTATGGATAGAGGA  
CCGCAGGTATGAGCCCAGCGTGGTTCAGCCTAGCGGCGACTTCATAGCTTGGGGGAGACCACCGGTCA  
TAAAACCTCTAAAGGAGGACGACGAGGTGGTGGCCCTGGCACTACACCCAATCACGGACACGGTGCTG  
CCACTGAGATCGAGAACAGCCAGAATGCAGGGAAATGCTATCTACCGCATCAGCAAAACCTCACCAGG  
AGTGAGCGGGTCAACCGCTCTTTGTGGTTGACCTTAATGAGAATGGAGACCGCACCTTCGCACTAGCGG  
GGACAATAGGGAGAAGTATACGTGCAGGACCCTACCATCAATATGAGATCCAATCACATTTGCCGTTG  
CCTACCACACCATATGACACTATACTCAGAGCAGGCATAGTCCTCCAGCTATTTAGCCATCCGGGGGC  
GGGAAAGACCCGTGCAATACCGGAGTACGTGAGGCAGCTTATGACCTGGTCCAACAAGGTCTATGTGCG  
CCGGCCCAACCCGGGTGGTTGCTAGAGAGATGCTGGAGGCGCTGGAGGGCACCCGGTGGGTGTGCGCC  
ATGGTAAAGGGGCTTCCAAAACCCACGCCTTGGCCAGAGTGGTTGTTACAACACACCAAACCTTACT  
CCGCTACGCGCTCACCTCCGGGCTCTTGGCCTCGCGAGATGTGTGTCATATGTGCTGGATGAGACGCATG  
TCGACTCAGCGCAGACCAAGGTTCTGCGAGCACTGGTACATCAGGCTGTGGGAAAGGACAAAAGCAAG  
GCAGCTTGCATAGAGATGACTGCCACCGGGAGAGACTCCACCAGCGGAGAGATAAGAGTGGCGACGGA  
TAGCAACTACCACATCGAAGAGCACGTCTATACCACACCTGTGGCCCAGGCAGTTAAACAGTATGCTG  
ACACATACGGACCGAGGCGAATTGCGGTCTTCGTGCCAGGCCTGACGGGGAAGAGCGGAGCCTTACAG  
GTAGCTAAACAGGTGAGGCAGCTCACCGACTACGCCACGGTGGTCTGAGTAGGAAGACGTATGAAAA  
GAACATCAAGCTGATCTTTAGGGGCTACCCTAGAGGGCTGTGCATAGTGACCACCTCCATCAGTGAAT  
GTGGAGCCAACTATGACCTAGACGCAGTTTTTTGACACATGCCAACAATACCACTACCTTGTTACGGCT  
TCAGGAACTAAGGGAATGATAACCCCTCCACCCAAGCCCAGACCTGCCAAAGGAGAGGCAGGGTTGG  
AAGGAGAAAGGAGGGCCAGTACTACCGGCCAGCAAATTATGATCTGCTGCAAGCCCCTCCCCTGGATC  
ACCCGACTCGGTCACTCTGCTGGAGGCCAACATGTGCCTTAGGGCACTGGGGCTCCCGGAGGAGCCG  
TGTGGAAGAGTTGTTGAGGAGGCGATGCTAAAAATGCAGCCCTCCAAGGATCAGGTGTATAGGTGGCT  
GACCGAGGGAGACACGGAGACTCTAACAGAGACCATGGCCATGTACAACGTTGAAGGTGGAAGAAGAA  
GCCGTGAGCAGGAGAGAACAGTTCGAAATAGGATGAAAACCTACTTCCATGACGTGAGTGGGAGAGA  
GTGGAAGATCAAGAAGAAACACCACAACCAAGACCAGGAGAATACATCTGGGATGAAGAGGGCCCTGA  
GATGATACAAGGAGCATCGTATGCTAGGGCCCCACCACCTCACAGAATGCGAGTGAACGAAGCCACCT  
ACCTCAGGGGCACAGTCATAGAGACCCTGAGAGAGGAGGCGGACAGAGAGCTGAGAGAGACGGTGGCT  
GAGCAGCGGGAAGAATAGGCCGCGCTCACGTAGCCACACGGACGCGACTCGGACTGTGACACGGAACA  
GAGGACAAGGATCACAAGTTCAAGACAAACACTGGCGCCCTAGCAAAGACTAGGTTGCGGCTCGCGCC  
ACCGCAAACAAAAAATAGAAAAAACGAAACACAAAAGTCTGTAGTTAAAGCG

>MT328\_ON186520

AGTTGCAAGTGCCATAGCTTGGAATCCCGCCGCAGACTCAAACGAACGAAACACTCCAAAAAGCAAAA  
CCGGCTTCGCAGCTACTGCTAGAAACAGACGGATTTGTGGGAGTACCAACAACAACAATGCCAAACAT  
AAAAACTGCCTTGCTCTTGGTCACCCTGATGGGGTTGGCCTTAGGAGGCAATGACAAGCCAGACTGGG  
AAAAGGTGAAGCTGCTCGGACAGCAACTGCAGTCGGGCATTGCTACAAAGAACGCCGTAAAAGTGAAG  
TACTACGCTGAACTAATCATCTCTGAGATGCCTACTGACGAAACAACATATTATGCTGGCCTGAGAAC



AGGACAAGAAGTGGCACTCACGGTGGGCTCGGCGAAGTCCATCGTCGGAGAGACTCTGAACTTAAGAA  
TCAACCAATGGACTAGGGCAGTCGGGGAGTATCTCATGATCGACCGGCATGTCCCAGGACTGACCCTC  
CTGATCACGGGAGAGGATGTCTTGAGTGATCTCATGGAATTCGGGTGGAGCTACAGGCTTAACCCTAG  
CGGACACTACCCTGTATACGCAGCCACCAAGACCCTACCCGGAAGGGGGGCAGGTACACTGGTGGAA  
AGACCTACACCGACAGGTATGCCGCGTTCTATGACGGGCACGTAAAAGACCACATGGTAGCAATACAC  
CCTCACCAGGCTGACATCGAGAGAATGACTAAATACGAACCAATCAACCTAGTCTACGCAGATCTAAC  
ACCGAGGAGCATTGGTGAAGACTCGAGCACGTTCTCGTGACGAAGGGCCACTACACAATTCAGGCAG  
GGAAAATCACCCACGTGTGGGGAGATAAAAAAGACTGTGAAACATGTGATCCGAACTACCAGGTTTTT  
CAGTAGAGGGGGGACACGCCCAGCCGGTGCCCCCGTTCCCGGAAGACAACACCCACGGGAAGGGAA  
GGTTGGATTCTTGACTGGATGATCATCGCAGGAGATTACTTCAAAGGCTACAGGGGAAGGCTAACAT  
CATGGGAGAGGGCTTTTGACATCATCTTGATGAAGCTAGGGACCTGTTTCCGTCAAGCAAAGAGTTTG  
CCCTGCCAGGCTTGATACGACAGTACCTCGAGAGACGGGACGTACCACTGGATTGCGCCTTCTTTCTG  
GATGTTTTCTACCGCTGGTCTTGATGGCCCTTGCCATCACGACCAACCGATGGACTCGAATGGCCCT  
GGCCGTTGGGGTGACCTTACCGGGTACTACTACATAGCCATCATGCTGGCCGCCACCTCGGTGGTGT  
CGCTAGCTTTCAAGGCATTTCGCACCAAGGAAATGTGAGCGCGGGGACGTTGTGATCGAGAATGGGAGA  
CTCAGTGTGCTGGGTATCACCGCGGTAGCCGTGGCTGCCACGGTGGGCATCCACTACTGGCAACCAAG  
TCCTTCGCTCATATTTGCGGTGGCCTCATTGGCCGGGTTTCGCCGAATCCTCATGGCTTTACCGACCA  
TCCAATACCATGGCGCCACAGACGTCGCTAAGATGATGATGGCGGTCTCTATTTCGCAGGGGTGATC  
TACATCGCGTCCTCTTTTGATGTCGACAAGGACCAGCTATACTTGTGTGTAAGACGGGCACCCCGAC  
CTACCACATCCCACGTGGAGAGAGAGAAAACGCAGTAAAGCTGGATCAGGTCTACAACCTGGCCCGAT  
ACTACGCAAGGTATCCAGCTGATCTGCGTGCCAGATTTCGTGACAGAAGAGGCGATATGGGAGTGGGCC  
CCCGGCACCACATGGACGGTGGCTGAGATGGACTACATGGCAACAATTCTCCACGCGATCGTCTTCAG  
CCTCGCGGTTTACACCATGTTGACGGATTGAGGGGAAACGGACAGGGTCTTGGGGACATAAAGATGC  
GTATCCTAGAAAAAATCAAGACCACAGAGCTCTTTGGGGATGTGACGATGGCAAAGATAACTCTCGCT  
ATCAGCAGGGTTGAGTGGCTTGTGTCATAGCGGGAAATCTATTGCACACCTACTTTGCCCTAGGGCT  
TCCGGGCGTTGCGGTGAGATCCTCCTGGCAGCCGACTGATGGTACCCACTTACCACCTGTGGAGCA  
GGACCTACCGAGTCATGTCATACCTGAGAGGGACTAATGGCTACAGACAGCCTGTTGAGGGCCTGCTC  
CCAGCCCCTACGATAAGGAACACCCAAACGCAGTACACAGCAGGATTGGCAACAATAGTGGGAATCGC  
GGCTGTGCTCGTAAACCTGTACTACTACCTGATAGGAAGCAACCCCTATTATGTAGCCACAGCGTGC  
TAGTCTTCGCAGGCACGTTTGTGATGGTCCAGGACAACGACCAGTTGAACGGCTACCCACTCTTAATG  
TTGATGGCATACACATTTAACTCCCCAAGTCTGGCACTCATAGGTAGCATCTACAAAAAGTGCCTAGG  
TAGAGTCCTGTGGAGCAGGACGACTTAGGGGGTTTTCGTTCATACCGGAAAAGAC

>MT308\_ON186521

AGTTGCAAGTGCCATAGCTTGGAATCCCGCCGCAGACTCAAACGAACGAAACACTCCAAAAAGCAAAA  
CCGGCTTCGCAGCTACTGCTAGAAACAGACGGATTTGTGGGAGTACCAACAACAACAATGCCAAACAC  
AAAACTGCCTTGCTCTTGCTCACCCTGATGGGGTTGGCCTTAGGAGGCAATGACAAGCCAGACTGGG  
AAAAGGTGAAGCTGCTCGGACAGCAACTGCAGTCGGGCATTGCTACAAAGAACGCCGTAAAAGTGAAG  
TACTACGCTGAACTAATCATCTCTGAGATGCCTACTGACGAAACAACATATTATGCTGGCCTGAGAAC  
AGGACAAGAAGTGGCACTCACGGTGGGCTCGGCGAAGTCCATCGTCGGAGAGACTCTGAACTTAAGAA  
TCAACCAATGGACTAGGGCAGTCGGGGAGTATCTCATGATCGACCGGCATGTCCCAGGACTGACCCTC  
CTGATCACGGGAGAGGATGTCTTGAGTGATCTCATGGAATTCGGGTGGAGCTACAGGCTTAACCCTAG  
CGGACACTACCCTGTATACGCAGCCACCAAGACCCTACCCGGAAGGGGGGCAGGTACACTGGTGGAA  
AGACCTACACCGACAGGTATGCCGCGTTCTATGACGGACACGTAAAAGACCACATGGTAGCAATACAC  
CCTCACCAGGCTGACATCGAGAGAATGACTAAATACGAACCAATCAACCTAGTCTACGCAGATCTAAC  
ACCGAGGAGCATTGGTGAAGACTCGAGCACGTTCTCGTGACGAAGGGCCACTACACAATTCAGGCAG  
GGAAAATCACCCACGTGTGGGGAGATAAGAAAGACTGTGAAACATGTGATCCGAACTACCAGGTTTTT  
CAGTAGAGGGGGGACACGCCCACCGGTGCCCCCGTTCCCGGAAGACAACACCCACGGGAAGGGAA

GGTTGGATTCTGACTGGATGATCATCGCAGGAGATTACTTCAAAGGCTACAGGGGAAGGCTAACAT  
CATGGGAGAGGGCTTTGACATCATCTTGGATGAAGCTAGGGACCTGTTTCCGTCAAGCAAAGAGTTTG  
CCCTACCAGGCTTGATACGACAGTACCTCGAGAGACGGGACGTACCACTGGATTTCGGCCTTCTTTCTG  
GATGTTTTCTACCGCTGGTCTTGATGGCCCTTGCCATCACGACCAACCGATGGACTCGAATGGCCCT  
GGCCGTTGGGGTGACCTTACCGGGTACTACTACATAGCCATCATGCTGGCCGCCACCTCGGTGGTGT  
CGCTAGCTTTCAAGGCATTTCGCACCAAGGAAATGTGAGCGCGGGGACGTTGTGATTGAGAATGGGAGA  
CTCAGTGTGCTGGGTATCACCGCGGTAGCCGTGGCTGCCACGGTGGGCATCCACTACTGGCAACCAAG  
TCCTTCGCTCATATTTGCGGTGGCCTCATTGGCCGGGTTCCGCCGAATCCTCATGGCTTTACCGACTA  
TCCAATACCATGGCGCCACAGACGTCGCTAAGATGATGATGGCGGTCTCTATTTCGCAGGGGTGATC  
TACATCGCGTCTCTTTTGATGTCGACAAGGACCAGCTGTACTTGTGTTGTAAAGACGGGCACCCCGAC  
CTACCACATCCACGTGGAGAGAGAGAAAACGCAGTAAAGCTGGATCAGGTCTACAACCTGGCCCGAT  
ACTACGCAAGGTATCCAGCAGATCTGCGTGCCAGATTTCGTGACAGAGGAGGCGATATGGGAGTGGGCC  
CCCGGCGCCACATGGACGGTGGCTGAGATGGACTACATGGCAACAATTCTCCATGCGATCGTCTTCAG  
CCTCGCGGTTTACACCATGTTGACGGATTTCAGGGGAAACGGACAGGGTCTTGGGGACATAAAGATGC  
GTATCCTAGAAAAAATCAAGACCACAGAGCTCTTTGGGGATGTGACGATGGCAAAGATAACTCTCGCT  
ATCAGCAGGGTTGAGTGGCTTGTCTCATAGCGGGAAATCTATTGCACACCTACTTTGCCCTAGGGCT  
TCCGGGCGTTGCGGTGAGATCCTCCTGGCAGCCGACTGATGGTACCCACTTACCACCTGTGGAGCA  
GGACCTACCGAGTCATGTCATACCTGAGAGGGACTAATGGCTACAGACAGCCTGTTGAGGGCTTGCTC  
CCAGCCCCTACGATAAGGAACACCCAAACGCAGTACACAGCAGGATTGGCAACAATAGTGGGAATCGC  
GGCTGTGCTCGTAAACCTGTACTACTACCTGATAGGAAGCAACCCCTATTATGTAGCCACAGCGTGC  
TAGTCTTCGCAGGCACGTTTGTGATGGTCCAGGACAACGACCAGTTGAACGGCTACCCACTCTTAATG  
TTGATGGCATAACATTTAACTCCCCAAGTCTGGCACTCATAGGTAGCATCTACAAAAGTGCCTAGG  
TAGAGTCCTGTGGAGCAGGACGACTTAGGGGGTTTCGTTTCATACCGGAAAAGAC

>MT304\_ON186522

AGTTGCAAGTGCCATAGCTTGAATCCCGCCGCAGACTCAAACGAACGAAACACTCCAAAAAGCAAAA  
CCGGCTTCGCAGTACTGCTAGAAACAGACGGATTTGTGGGAGTACCAACAACAACAATGCCAAACAC  
AAAAACTGCCTTGCTCTTGGTCACCCTGATGGGGTTGGCCTTAGGAGGCAATGACAAGCCAGACTGGG  
AAAAGGTGAAGCTGCTCGGACAGCAACTGCAGTCGGGCATTGCTACAAAGAACGCCGTAAAAGTGAAG  
TACTACGCTGAACTAATCATCTCTGAGATGCCTACTGACGAAACAACATATTATGCTGGCCTGAGAAC  
AGGACAAGAAGTGGCACTCACGGTGGGCTCGGCGAAGTCCATCGTTCGGAGAGACTCTGAACCTTAAGAA  
TCAACCAATGGACTAGGGCAGTCGGGGAGTATCTCATGATCGACCGGCATGTCCAGGACTGACCCTC  
CTGATCACGGGAGAGGATGTCTTGAGTGATCTCATGGAATTCGGGTGGAGCTACAGGCTTAACCCTAG  
CGGACACTACCCTGTATACGCAGCCACCAAGACCCTACCCGGAAGGGGGGCAGGTACACTGGTGGAA  
AGACCTACACCGACAGGTATGCCGCTTCTATGACGGACACGTAAGAACACATGGTAGCAATACAC  
CCTCACCAGGCTGACATCGAGAGAATGACTAAATACGAACCAATCAACCTAGTCTACGCAGATCTAAC  
ACCGAGGAGCATTTGGTGAAGACTCGAGCACGTTCTCGTGACGAAGGGCCACTACACAATTCAGGCAG  
GGAAAATCACCCACGTGTGGGGAGATAAGAAAGACTGTGAAACATGTGATCCGAACTACCAGGTTTTT  
CAGTAGAGGGGGGACACGCCCAACCGGTGCCCCCGTTCCCGGAAGACAACCCACGGGAAGGGAA  
GGTTGGATTCTGACTGGATGATCATCGCAGGAGATTACTTCAAAGGCTACAGGGGAAGGCTAACAT  
CATGGGAGAGGGCTTTGACATCATCTTGGATGAAGCTAGGGACCTGTTTCCGTCAAGCAAAGAGTTTG  
CCCTACCAGGCTTGATACGACAGTACCTCGAGAGACGGGACGTACCACTGGATTTCGGCCTTCTTTCTG  
GATGTTTTCTACCGCTGGTCTTGATGGCCCTTGCCATCACGACCAACCGATGGACTCGAATGGCCCT  
GGCCGTTGGGGTGACCTTACCGGGTACTACTACATAGCCATCATGCTGGCCGCCACCTCGGTGGTGT  
CGCTAGCTTTCAAGGCATTTCGCACCAAGGAAATGTGAGCGCGGGGACGTTGTGATTGAGAATGGGAGA  
CTCAGTGTGCTGGGTATCACCGCGGTAGCCGTGGCTGCCACGGTGGGCATCCACTACTGGCAACCAAG  
TCCTTCGCTCATATTTGCGGTGGCCTCATTGGCCGGGTTCCGCCGAATCCTCATGGCTTTACCGACTA  
TCCAATACCATGGCGCCACAGACGTCGCTAAGATGATGATGGCGGTCTCTATTTCGCAGGGGTGATC

TACATCGCGTCCTCTTTTGATGTCGACAAGGACCAGCTGTACTTGTGTTTGTAAGACGGGCACCCCGAC  
CTACCACATCCCACGTGGAGAGAGAGAAAACGCAGTAAAGCTGGATCAGGTCTACAACCTGGCCCCGAT  
ACTACGCAAGGTATCCAGCAGATCTGCGTGCCAGATTTCGTGACAGAGGAGGCGATATGGGAGTGGGCC  
CCCGGCGCCACATGGACGGTGGCTGAGATGGACTACATGGCAACAATTCTCCATGCGATCGTCTTCAG  
CCTCGCGGTTTACACCATGTTGACGGATTTCAGGGGAAACGGACAGGGTCCTTGGGGACATAAAGATGC  
GTATCCTAGAAAAAATCAAGACCACAGAGCTCTTTGGGGATGTGACGATGGCAAAGATAACTCTCGCT  
ATCAGCAGGGTTGAGTGGCTTGTGTCATAGCGGGAAATCTATTGCACACCTACTTTGCCCTAGGGCT  
TCCGGGCGTTGCGGTGAGATCCTCCTGGCAGCCGGACTGATGGTACCCACTTACCACCTGTGGAGCA  
GGACCTACCGAGTCATGTCATACCTGAGAGGGACTAATGGCTACAGACAGCCTGTTGAGGGCTTGCTC  
CCAGCCCCCTACGATAAGGAACACCCAAACGCAGTACACAGCAGGATTGGCAACAATAGTGGGAATCGC  
GGCTGTGCTCGTAAACCTGTACTACTACCTGATAGGAAGCAACCCCTATTATGTAGCCACAGCGTGC  
TAGTCTTCGCAGGCACGTTTGTGATGGTCCAGGACAACGACCAGTTGAACGGCTACCCACTCTTAATG  
TTGATGGCATAACATTTAACTCCCCAAGTCTGGCACTCATAGGTAGCATCTACAAAAGTGCCTAGG  
TAGAGTCCTGTGGAGCAGGACGACTTAGGGGGTTTCGTTTCATACCGGAAAAGAC

>MT297\_ON186523

AGTTGCAAGTGCCATAGCTTGAATCCCGCCGAGACTCAAACGAACGAAACACTCCAAAAAGCAAAA  
CCGGCTTCGCAGCTACTGCTAGAAACAGACGGATTTGTGGGAGTACCAACAACAACAATGCCAAACAC  
AAAAACTGCCTTGCTCTTGGTCACCCTGATGGGGTTGGCCTTAGGAGGCAATGACAAGCCAGACTGGG  
AAAAGGTGAAGCTGCTCGGACAGCAACTGCAGTCGGGCATTGCTACAAAGAACGCCGTAAAAGTGAAG  
TACTACGCTGAACTAATCATCTCTGAGATGCCTACTGACGAAACAACATATTATGCTGGCCTGAGAAC  
AGGACAAGAAGTGGCACTCACGGTGGGCTCGGCGAAGTCCATCGTCGGAGAGACTCTGAACTTAAGAA  
TCAACCAATGGACTAGGGCAGTCGGGGAGTATCTCATGATCGACCGGCATGTCCCAGGACTGACCCTC  
CTGATCACGGGAGAGGATGTCTTGAGTGATCTCATGGAATTCGGGTGGAGCTACAGGCTTAACCCTAG  
CGGACACTACCCTGTATACGCAGCCACCAAGACCCTACCCGGAAGGGGGGCAGGTACACTGGTGGAA  
AGACCTACACCGACAGGTATGCCGCGTTCTATGACGGACACGTAAGAGACCACATGGTAGCAATACAC  
CCTCACCAGGCTGACATCGAGAGAATGACTAAATACGAACCAATCAACCTAGTCTACGCAGATCTAAC  
ACCGAGGAGCATTGGTGAAGACTCGAGCACGTTCTCGTGACGAAGGGCCACTACACAATTCAGGCAG  
GGAAAATCACCCACGTGTGGGGAGATAAGAAAGACTGTGAAACATGTGATCCGAACCTACCAGGTTTTT  
CAGTAGAGGGGGGACACGCCCAACCGGTGCCCCCGTTCCCGGAAGACAACCCACGGGAAGGGAA  
GGTTGGATTCTCTGACTGGATGATCATCGCAGGAGATTACTTCAAAGGCTACAGGGGAAGGCTAACAT  
CATGGGAGAGGGCTTTGACATCATCTTGATGAAGCTAGGGACCTGTTTCCGTCAAGCAAAGAGTTTG  
CCCTACCAGGCTTGATACGACAGTACCTCGAGAGACGGGACGTACCACTGGATTTCGGCCTTCTTTCTG  
GATGTTTTCTACCGCTGGTCTTGATGGCCCTTGCCATCACGACCAACCGATGGACTCGAATGGCCCT  
GGCCGTTGGGGTGACCTTACCGGGTACTACTACATAGCCATCATGCTGGCCGCCACCTCGGTGGTGT  
CGCTAGCTTTCAAGGCATTTCGCACCAAGGAAATGTGAGCGCGGGGACGTTGTGATTGAGAATGGGAGA  
CTCAGTGTGCTGGGTATCACCGCGGTAGCCGTGGCTGCCACGGTGGGCATCCACTACTGGCAACCAAG  
TCCTTCGCTCATATTTGCGGTGGCCTCATTGGCCGGGTTTCGCCGAATCCTCATGGCTTTACCGACTA  
TCCAATACCATGGCGCCACAGACGTCGCTAAGATGATGATGGCGGTCTCTCTATTTCGCAGGGGTGATC  
TACATCGCGTCCTCTTTTGATGTCGACAAGGACCAGCTGTACTTGTGTTTGTAAGACGGGCACCCCGAC  
CTACCACATCCCACGTGGAGAGAGAGAAAACGCAGTAAAGCTGGATCAGGTCTACAACCTGGCCCCGAT  
ACTACGCAAGGTATCCAGCAGATCTGCGTGCCAGATTTCGTGACAGAGGAGGCGATATGGGAGTGGGCC  
CCCGGCGCCACATGGACGGTGGCTGAGATGGACTACATGGCAACAATTCTCCATGCGATCGTCTTCAG  
CCTCGCGGTTTACACCATGTTGACGGATTTCAGGGGAAACGGACAGGGTCCTTGGGGACATAAAGATGC  
GTATCCTAGAAAAAATCAAGACCACAGAGCTCTTTGGGGATGTGACGATGGCAAAGATAACTCTCGCT  
ATCAGCAGGGTTGAGTGGCTTGTGTCATAGCGGGAAATCTATTGCACACCTACTTTGCCCTAGGGCT  
TCCGGGCGTTGCGGTGAGATCCTCCTGGCAGCCGGACTGATGGTACCCACTTACCACCTGTGGAGCA  
GGACCTACCGAGTCATGTCATACCTGAGAGGGACTAATGGCTACAGACAGCCTGTTGAGGGCTTGCTC

CCAGCCCCTACGATAAGGAACACCCAAACGCAGTACACAGCAGGATTGGCAACAATAGTGGGAATCGC  
GGCTGTGCTCGTAAACCTGTACTACTACCTGATAGGAAGCAACCCCTATTATGTAGCCACAGCGTGC  
TAGTCTTCGCAGGCACGTTTGTGATGGTCCAGGACAACGACCAGTTGAACGGCTACCCACTCTTAATG  
TTGATGGCATAACACATTTAACTCCCCAAGTCTGGCACTCATAGGTAGCATCTACAAAAAGTGCCTAGG  
TAGAGTCCTGTGGAGCAGGACGACTTAGGGGGTTTCGTTTCATACCGGAAAAGAC

>MT290\_ON186524

AGTTGCAAGTGCCATAGCTTGGAATCCCGCCGCGAGACTCAAACGAACGAAACACTCCAAAAAGCAAAA  
CCGGCTTCGCAGCTACTGCTAGAAACAGACGGATTTGTGGGAGTACCAACAACAACAATGCCAAACAC  
AAAAACTGCCTTGCTCTTGGTCACCCCTGATGGGGTTGGCCCTTAGGAGGCAATGACAAGCCAGACTGGG  
AAAAGGTGAAGCTGCTCGGACAGCAACTGCAGTCGGGCATTGCTACAAAGAACGCCGTAAAAGTGAAG  
TACTACGCTGAACTAATCATCTCTGAGATGCCTACTGACGAAACAACATATTATGCTGGCCTGAGAAC  
AGGACAAGAAGTGGCACTCACGGTGGGCTCGGCGAAGTCCATCGTCGGAGAGACTCTGAACTTAAGAA  
TCAACCAATGGACTAGGGCAGTCGGGGAGTATCTCATGATCGACCGGCATGTCCCAGGACTGACCCTC  
CTGATCACGGGAGAGGATGTCTTGAGTGATCTCATGGAATTCGGGTGGAGCTACAGGCTTAACCCTAG  
CGGACACTACCCTGTATACGCAGCCACCAAGACCCCTACCCGGAAGGGGGGCAGGTACACTGGTGGAA  
AGACCTACACCGACAGGTATGCCGCGTTCTATGACGGACACGTAAAAGACCACATGGTAGCAATACAC  
CCTCACCAGGCTGACATCGAGAGAATGACTAAATACGAACCAATCAACCTAGTCTACGCAGATCTAAC  
ACCGAGGAGCATTGGTGGAAAGACTCGAGCACGTTCTCGTGACGAAGGGCCACTACACAATTCAGGCAG  
GGAAAATCACCCACGTGTGGGGAGATAAGAAAGACTGTGAAACATGTGATCCGAACCTACCAGGTTTTT  
CAGTAGAGGGGGGACACGCCCAACCGGTGCCCCCGTTCCCGGAAGACAACACCCACGGGAAGGGAA  
GGTTGGATTCTGACTGGATGATCATCGCAGGAGATTACTTCAAAGGCTACAGGGGAAGGCTAACAT  
CATGGGAGAGGGCTTTGACATCATCTTGATGAAGCTAGGGACCTGTTTCCGTCAAGCAAAGAGTTTG  
CCCTACCAGGCTTGATACGACAGTACCTCGAGAGACGGGACGTACCACTGGATTTCGGCCTTCTTTCTG  
GATGTTTTCTACCGCTGGTCTTGATGGCCCTTGCCATCACGACCAACCGATGGACTCGAATGGCCCT  
GGCCGTTGGGGTGACCTTACCGGTACTACTACATAGCCATCATGCTGGCCGCCACCTCGGTGGTGT  
CGCTAGCTTTCAAGGCATTTCGCACCAAGGAAATGTGAGCGCGGGGACGTTGTGATTGAGAATGGGAGA  
CTCAGTGTGCTGGGTATCACCGCGGTAGCCGTGGCTGCCACGGTGGGCATCCACTACTGGCAACCAAG  
TCCTTCGCTCATATTTGCGGTGGCCTCATTGGCCGGGTTCCCGCAATCCTCATGGCTTTACCGACTA  
TCCAATACCATGGCGCCACAGACGTCGCTAAGATGATGATGGCGGTCTCCTATTTCGCAGGGGTGATC  
TACATCGCGTCTCTTTTGATGTCGACAAGGACCAGCTGTACTTGTGTTGTAAAGACGGGCACCCCGAC  
CTACCACATCCCACGTGGAGAGAGAGAAAACGCAGTAAAGCTGGATCAGGTCTACAACCTGGCCCCGAT  
ACTACGCAAGGTATCCAGCAGATCTGCGTGCCAGATTTCGTGACAGAGGAGGCGATATGGGAGTGGGCC  
CCCGGCGCCACATGGACGGTGGCTGAGATGGACTACATGGCAACAATTCTCCATGCGATCGTCTTCAG  
CCTCGCGGTTTACACCATGTTGACGGATTTCAGGGGAAACGGACAGGGTCCTTGGGGACATAAAGATGC  
GTATCCTAGAAAAAATCAAGACCACAGAGCTCTTTGGGGATGTGACGATGGCAAAGATAACTCTCGCT  
ATCAGCAGGGTTGAGTGGCTTGTCTCATAGCGGAAATCTATTGCACACCTACTTTGCCCTAGGGCT  
TCCGGGCGTTGCGGTTCGAGATCCTCCTGGCAGCCGACTGATGGTACCCACTTACCACCTGTGGAGCA  
GGACCTACCGAGTCATGTCATACCTGAGAGGGACTAATGGCTACAGACAGCCTGTTGAGGGCTTGCTC  
CCAGCCCCTACGATAAGGAACACCCAAACGCAGTACACAGCAGGATTGGCAACAATAGTGGGAATCGC  
GGCTGTGCTCGTAAACCTGTACTACTACCTGATAGGAAGCAACCCCTATTATGTAGCCACAGCGTGC  
TAGTCTTCGCAGGCACGTTTGTGATGGTCCAGGACAACGACCAGTTGAACGGCTACCCACTCTTAATG  
TTGATGGCATAACACATTTAACTCCCCAAGTCTGGCACTCATAGGTAGCATCTACAAAAAGTGCCTAGG  
TAGAGTCCTGTGGAGCAGGACGACTTAGGGGGTTTCGTTTCATACCGGAAAAGAC

>MT299\_ON186525

AGTTGCAAGTGCCATAGCTTGGAATCCCGCCGCGAGACTCAAACGAACGAAACACTCCAAAAAGCAAAA  
CCGGCTTCGCAGCTACTGCTAGAAACAGACGGATTTGTGGGAGTACCAACAACAACAATGCCAAACAC

AAAAACTGCCTTGCTCTTGGTCACCCTGATGGGGTTGGCCTTAGGAGGCAATGATAAGCCAGACTGGG  
AAAAGGTGAAGCTGCTCGGACAGCAACTGCAGTCGGGCATTGCTACAAAAGAACGCCGTAAAAGTGAAG  
TACTACGCTGAACTAATCATCTCTGAGATGCCTACTGACGAAACAACATATTATGCTGGCCTGAGAAC  
AGGACAAGAAGTGGCACTCACGGTGGGCTCGGCGAAGTCCATCGTCGGAGAGACTCTGAACTTAAGAA  
TCAACCAATGGACTAGGGCAGTCGGGGAGTATCTCATGATCGACCGGCATGTCCCAGGACTGACCCTC  
CTGATCACGGGAGAGGATGTCTTGAGTGATCTCATGGAATTCGGGTGGAGCTACAGGCTCAACCCTAG  
CGGACATTACCCTGTATACGCAGCCACTAAGACCCTACCCGGAAGGGGGGCAGGTACACTGGTGGAA  
AGACCTACACCGACAGGTATGCCGCGTTCTATGACGGACACGTAAAAGACCACATGGTAGCAATACAC  
CCTCACCAGGCTGACATCGAGAGAATGACTAAATACGAACCAATCAACCTAGTCTACGCAGATCTAAC  
ACCGAGGAGCATTGGTGAAGACTCGAGCACGTTCTCGTGACGAAGGGCCACTACACAATTCAGGCAG  
GGAAAATCACCCACGTGTGGGGAGATAAGAAAGACTGTGAAACATGTGATCCGAACCTACCAGGTTTTT  
CAGTAGAGGGGGGACACGCCCAACCGGTGCCCCCGTTCCCGGAAGACAACCCACGGGAAGGGAA  
GGTTGGATTCTGACTGGATGATCATCGCAAGAGATTACTTCAAAGGCTACAGGGAAAGGCTGACAT  
CATGGGAGAGGGCTTTGACATCATCTTGATGAAGCTAGGGACCTGTTTCCGTCAAGCAAAGAGTTTG  
CCCTACCAGGCTTGATACGACAGTACCTCGAGAGACGGGACGTACCACTGGATTTCGGCCTTCTTTCTG  
GATGTTTTTCTACCGCTGGTCTTGATGGCCCTTGCCATCACGACTAACCGATGGACTCGAATGGCCCT  
GGCCGTTGGGGGTACCTTACCGGTACTACTACATAGCCATCATGCTGGCCGCCACCTCGGTGGTGT  
CGCTAGCTTTCAAGGCATTTCGCACCAAGGAAATGTGAGCGCGGGGACGTTGTGATCGAGAATGGGAGA  
CTCAGTGTGCTGGGCATCACCGCGGTAGCCGTGGCTGCCACGGTGGGCATCCACTACTGGCAACCAAG  
TCCTTCGCTCATATTTGCGGTGGCCTCATTGGCCGGGTTCCGCCGAATCCTCATGGCTTTACCGACCA  
TCCAATACCATGGCGCCACAGACGTCGCTAAGATGATGATGGCGGTCTCTCTATTTCGCAGGGGTGATC  
TACATCGCGTCCTCTTTTGATGTGACAAAGGACCAGCTATACTTGTGTTGTAAGACAGGCACCCCGAC  
CTACCACATCCACGTGGAGAGAGAGAAAAACGCAGTAAAGCTGGATCAGGTCTACAACCTGGCCCGAT  
ACTACGCAAGGTATCCAGCTGATCTGCGTGCCAGATTTCGTGACAGAAGAGGCGATATGGGAGTGGGCC  
CCCGGCGCCACATGGACGGTGGCTGAGATGGACTACATGGCAACAATTCTCCATGCGATCGTCTTCAG  
CCTCGCGGTTTACACCATGTTGACGGATTTCAGGGGAAACGGACAGGGTCCTTGGGGACATAAAGATGC  
GTATCCTAGAAAAAATCAAGACCACAGAGCTCTTTGGGGATGTGACGATGGCAAAGATAACTCTCGCT  
ATCAGCAGGGTTGAGTGGCTTGTGTCATAGCGGGAAATCTATTGCACACCTACTTTGCCCTGGGGCT  
TCCGGGCGTTGCGGTGAGATCCTCCTGGCAGCCGGACTGATGGTACCCACTTACCACCTGTGGAGCA  
GGACCTACCGAGTCATGTCATACCTGAGAGGGACTAATGGCTACAGACAGCCTGTTGAGGGCCTGCTC  
CCAGCCCCTACGATAAGGAACACCCAAACGCAGTACACAGCAGGATTGGCAACAATAGTGGGAATCGC  
GGCTGTGCTCGTAAACCTGTACTACTACCTGATAGGAAGCAACCCCTATTATGTAGCCACAGCGTGC  
TAGTCTTCGCAGGCACGTTTGTGATGGTCCAGGACAACGACCAGTTGAACGGCTACCCACTCTTAATG  
TTGATGGCATAACATTTAACTCCCCAAGTCTGGCACTCATAGGTAGCATCTACAAAAGTGCCTAGG  
CAGAGTCCTGTGGAGCAGGACGACTTAGGGGGTTTCGTTTCATACCGGAAAAGAC

>MT293\_ON186526

AGTTGCAAGTGCCATAGCTTGGAATCCCGCCGAGACTCAAACGAACGAAACACTCCAAAAAGCAAAA  
CCGGCTTCGCAGCTACTGCTAGAAACAGACGGATTTGTGGGAGTACCAACAACAACAATGCCAAACAC  
AAAAACTGCCTTGCTCTTGGTCACCCTGATGGGGTTGGCCTTAGGAGGCAATGATAAGCCAGACTGGG  
AAAAGGTGAAGCTGCTCGGACAGCAACTGCAGTCGGGCATTGCTACAAAAGAACGCCGTAAAAGTGAAG  
TACTACGCTGAACTAATCATCTCTGAGATGCCTACTGACGAAACAACATATTATGCTGGCCTGAGAAC  
AGGACAAGAAGTGGCACTCACGGTGGGCTCGGCGAAGTCCATCGTCGGAGAGACTCTGAACTTAAGAA  
TCAACCAATGGACTAGGGCAGTCGGGGAGTATCTCATGATCGACCGGCATGTCCCAGGACTGACCCTC  
CTGATCACGGGAGAGGATGTCTTGAGTGATCTCATGGAATTCGGGTGGAGCTACAGGCTCAACCCTAG  
CGGACATTACCCTGTATACGCAGCCACTAAGACCCTACCCGGAAGGGGGGCAGGTACACTGGTGGAA  
AGACCTACACCGACAGGTATGCCGCGTTCTATGACGGACACGTAAAAGACCACATGGTAGCAATACAC  
CCTCACCAGGCTGACATCGAGAGAATGACTAAATACGAACCAATCAACCTAGTCTACGCAGATCTAAC

ACCGAGGAGCATTGGTGGAAAGACTCGAGCACGTTCTCGTGACGAAGGGCCACTACACAATTCAGGCAG  
GGAAAATCACCCACGTGTGGGGAGATAAGAAAAGACTGTGAAACATGTGATCCGAACCTACCAGGTTTTT  
CAGTAGAGGGGGGACACGCCCAACCGGTGCCCCCGTTCCCGGAAGACAACACCCACGGGAAGGGAA  
GGTTGGATTCTGACTGGATGATCATCGCAAGAGATTACTTCAAAGGCTACAGGGAAAGGCTGACAT  
CATGGGAGAGGGCTTTTGACATCATCTTGATGAAGCTAGGGACCTGTTTCCGTCAAGCAAAGAGTTTG  
CCCTACCAGGCTTGATACGACAGTACCTCGAGAGACGGGACGTACCACTGGATTTCGGCCTTCTTTCTG  
GATGTTTTTCTACCGCTGGTCTTGATGGCCCTTGCCATCACGACTAACCGATGGACTCGAATGGCCCT  
GGCCGTTGGGGTGTACCTTACCGGGTACTACTACATAGCCATCATGCTGGCCGCCACCTCGGTGGTGT  
CGCTAGCTTTCAAGGCATTTCGCACCAAGGAAATGTGAGCGCGGGGACGTGTGATCGAGAATGGGAGA  
CTCAGTGTGCTGGGCATCACCGCGGTAGCCGTGGCTGCCACGGTGGGCATCCACTACTGGCAACCAAG  
TCCTTCGCTCATATTTGCGGTGGCCTCATTGGCCGGGTTTCGCCGCAATCCTCATGGCTTTACCGACCA  
TCCAATACCATGGCGCCACAGACGTCGCTAAGATGATGATGGCGGTCTCTCTATTTCGCAGGGGTGATC  
TACATCGCGTCCTCTTTTGATGTCGACAAGGACCAGCTATACTTGTGTTGTGAAGACAGGCACCCCGAC  
CTACCACATCCACGTGGAGAGAGAGAAAAACGCAGTAAAGCTGGATCAGGTCTACAACCTGGCCCGAT  
ACTACGCAAGGTATCCAGCTGATCTGCGTGCCAGATTTCGTGACAGAAGAGGCGATATGGGAGTGGGCC  
CCCGGCGCCACATGGACGGTGGCTGAGATGGACTACATGGCAACAATTCTCCATGCGATCGTCTTCAG  
CCTCGCGGTTTACACCATGTTGACGGATTCAGGGGAAACGGACAGGGTCCTTGGGGACATAAAGATGC  
GTATCCTAGAAAAAATCAAGACCACAGAGCTCTTTGGGGATGTGACGATGGCAAAGATAACTCTCGCT  
ATCAGCAGGGTTGAGTGGCTTGTCGTCATAGCGGGAAATCTATTGCACACCTACTTTGCCCTGGGGCT  
TCCGGGCGTTGCGGTTCGAGATCCTCCTGGCAGCCGACTGATGGTACCCACTTACCACCTGTGGAGCA  
GGACCTACCGAGTCATGTCATACCTGAGAGGGACTAATGGCTACAGACAGCCTGTTGAGGGCCTGCTC  
CCAGCCCCTACGATAAGGAACACCCAAACGCAGTACACAGCAGGATTGGCAACAATAGTGGGAATCGC  
GGCTGTGCTCGTAAACCTGTACTACTACCTGATAGGAAGCAACCCCTATTATGTAGCCACAGCGTGC  
TAGTCTTCGCAGGCACGTTTGTGATGGTCCAGGACAACGACCAGTTGAACGGCTACCCACTCTTAATG  
TTGATGGCATAACATTTAACTCCCCAAGTCTGGCACTCATAGGTAGCATCTACAAAAAGTGCCTAGG  
CAGAGTCCTGTGGAGCAGGACGACTTAGGGGGTTTCGTTTCATACCGGAAAAGAC
