# Supplementary material for: Jingmen Tick Virus in Ticks from Kenya
Source: MDPI journal article supplement (doi:10.3390/v14051041), 2022-05-13
Supplement: s1 [file s1]

**Table S3. Relative abundance of ticks sampled from different hosts.**

| <b>Tick Species</b>                  | <b>Goats (%)</b>    | <b>Sheep (%)</b>    | <b>Cattle (%)</b>  | <b>Tortoises (%)</b> | <b>n (%)</b> |
|--------------------------------------|---------------------|---------------------|--------------------|----------------------|--------------|
| <i>Rhipicephalus appendiculatus</i>  | 1190 (26.15)        | 979 (21.52)         | 205 (4.51)         | 0                    | 2374 (52.18) |
| <i>Hyalomma rufipes</i>              | 373 (8.20)          | 31 (0.68)           | 369 (8.11)         | 0                    | 773 (17.00)  |
| <i>Hyalomma impeltatum</i>           | 381 (8.37)          | 435 (9.56)          | 168 (3.69)         | 0                    | 984 (21.62)  |
| <i>Rhipicephalus evertsi evertsi</i> | 22 (0.48)           | 65 (1.43)           | 16 (0.35)          | 0                    | 103 (2.26)   |
| <i>Amblyomma gemma</i>               | 22 (0.48)           | 9 (0.20)            | 39 (0.86)          | 0                    | 70 (1.54)    |
| <i>Hyalomma albiparmatum</i>         | 27 (0.59)           | 11 (0.24)           | 23 (0.51)          | 0                    | 61 (1.34)    |
| <i>Hyalomma truncatum</i>            | 26 (0.57)           | 19 (0.42)           | 17 (0.37)          | 0                    | 62 (1.36)    |
| <i>Amblyomma</i> sp.                 | 0                   | 0                   | 0                  | 35 (0.77)            | 35 (0.77)    |
| <i>Amblyomma sparsum</i>             | 0                   | 0                   | 0                  | 7 (0.15)             | 7 (0.15)     |
| <i>Amblyomma nuttalli</i>            | 0                   | 0                   | 0                  | 5 (0.11)             | 5 (0.11)     |
| <i>Rhipicephalus pulchellus</i>      | 0                   | 0                   | 3 (0.07)           | 0                    | 3 (0.07)     |
| <i>Amblyomma variegatum</i>          | 0                   | 11 (0.24)           | 0                  | 0                    | 11 (0.24)    |
| <i>Amblyomma lepidum</i>             | 0                   | 0                   | 4 (0.09)           | 0                    | 4 (0.09)     |
| <i>Hyalomma marginatum</i>           | 0                   | 2 (0.04)            | 0                  | 0                    | 2 (0.04)     |
| <i>Hyalomma marginatum</i> spp.      | 29 (0.64)           | 12 (0.26)           | 15 (0.33)          | 0                    | 56 (1.23)    |
| <b>Total (%)</b>                     | <b>2070 (45.49)</b> | <b>1574 (34.59)</b> | <b>859 (18.88)</b> | <b>47 (1.03)</b>     | <b>4550</b>  |

n: number of collected ticks.
